# Supplementary material for: Short high-accuracy tritium data time series for assessing groundwater mean transit times in the vadose and saturated zones of the Luxembourg Sandstone aquifer
Source: Copernicus journal article supplement (doi:10.5194/hess-2023-152), 2023-06-20
Supplement: Supplementary file 1 [file hess-2023-152-supplement.pdf]

## **Supplement of**

# **Short high-accuracy tritium data time series for assessing groundwater mean transit times in the vadose and saturated zones of the Luxembourg Sandstone aquifer**

Laurent Gourdol<sup>1</sup>, Michael K. Stewart<sup>2</sup>, Uwe Morgenstern<sup>2</sup>, Laurent Pfister<sup>1,3</sup>

<sup>1</sup>Luxembourg Institute of Science and Technology (LIST), Belvaux, Luxembourg

<sup>2</sup>GNS Science, Tritium & Water Dating Laboratory, Lower Hutt, New Zealand

<sup>3</sup>University of Luxembourg, Faculty of Science, Technology and Communication, Belval, Luxembourg

*Correspondence to:* Laurent Gourdol (laurent.gourdol@list.lu)

### **Contents of this file**

Tables S1-S3

Figures S1-S35

**Table S1.** Statistical summary of the ensembles of most likely EPM solutions retained.

| Spring | N    | NSE<br>median | Exponential to total flow (F) |      |        |      |      | Mean Transit Time ( $\tau_{mT}$ , years) |      |        |      |      | $\tau_{exp}(\tau_{mT}, F, \text{years})$ |      |        |      |      | $\tau_{pl}(\tau_{mT}, (1-F), \text{years})$ |      |        |      |      |
|--------|------|---------------|-------------------------------|------|--------|------|------|------------------------------------------|------|--------|------|------|------------------------------------------|------|--------|------|------|---------------------------------------------|------|--------|------|------|
|        |      |               | P5%                           | P25% | median | P75% | P95% | P5%                                      | P25% | median | P75% | P95% | P5%                                      | P25% | median | P75% | P95% | P5%                                         | P25% | median | P75% | P95% |
| B01    | 1668 | 0.87          | 0.64                          | 0.75 | 0.86   | 0.92 | 0.97 | 15.7                                     | 17.6 | 19.1   | 20.6 | 22.6 | 14.0                                     | 14.8 | 15.5   | 16.5 | 18.0 | 0.4                                         | 1.3  | 2.6    | 5.3  | 8.1  |
| B02    | 1667 | 0.83          | 0.59                          | 0.70 | 0.83   | 0.91 | 0.97 | 8.1                                      | 11.6 | 14.1   | 16.5 | 19.6 | 7.6                                      | 10.3 | 11.2   | 12.0 | 13.1 | 0.4                                         | 1.0  | 2.3    | 4.9  | 8.0  |
| B03    | 1668 | 0.86          | 0.61                          | 0.75 | 0.83   | 0.91 | 0.98 | 12.5                                     | 14.5 | 16.2   | 17.9 | 20.7 | 11.6                                     | 12.3 | 13.0   | 13.9 | 15.0 | 0.3                                         | 1.2  | 2.8    | 4.4  | 8.0  |
| B06    | 1656 | 0.89          | 0.53                          | 0.65 | 0.77   | 0.88 | 0.95 | 10.1                                     | 13.3 | 15.9   | 18.8 | 21.6 | 9.2                                      | 10.5 | 11.6   | 13.0 | 14.3 | 0.5                                         | 1.6  | 3.6    | 6.4  | 10.1 |
| B07    | 1667 | 0.70          | 0.93                          | 0.95 | 0.97   | 0.98 | 1.00 | 12.3                                     | 13.2 | 14.1   | 15.0 | 15.8 | 12.0                                     | 12.8 | 13.6   | 14.4 | 15.2 | 0.0                                         | 0.2  | 0.5    | 0.7  | 1.0  |
| B09    | 1462 | 0.68          | 0.92                          | 0.95 | 0.97   | 0.98 | 1.00 | 13.3                                     | 14.6 | 15.9   | 17.0 | 18.0 | 12.9                                     | 14.1 | 15.2   | 16.2 | 17.5 | 0.1                                         | 0.3  | 0.5    | 0.8  | 1.4  |
| B10    | 1668 | 0.87          | 0.60                          | 0.69 | 0.82   | 0.91 | 0.97 | 12.9                                     | 14.9 | 16.7   | 18.7 | 21.2 | 11.8                                     | 12.4 | 13.2   | 13.9 | 15.1 | 0.4                                         | 1.4  | 2.9    | 5.7  | 8.4  |
| C01    | 1667 | 0.93          | 0.63                          | 0.74 | 0.83   | 0.91 | 0.96 | 19.5                                     | 22.1 | 24.0   | 25.6 | 27.2 | 15.4                                     | 17.2 | 18.9   | 21.1 | 24.7 | 0.9                                         | 2.1  | 4.0    | 6.5  | 9.5  |
| C03    | 1311 | 0.90          | 0.55                          | 0.67 | 0.75   | 0.85 | 0.93 | 10.0                                     | 12.5 | 14.7   | 17.5 | 20.6 | 8.3                                      | 9.8  | 11.1   | 12.2 | 13.5 | 0.8                                         | 1.9  | 3.5    | 5.7  | 9.0  |
| C04    | 1079 | 0.90          | 0.61                          | 0.70 | 0.78   | 0.84 | 0.93 | 7.9                                      | 9.4  | 11.5   | 13.8 | 16.7 | 6.5                                      | 7.8  | 8.9    | 10.1 | 10.9 | 0.7                                         | 1.5  | 2.4    | 3.9  | 6.6  |
| C05    | 1666 | 0.82          | 0.62                          | 0.70 | 0.78   | 0.83 | 0.89 | 5.4                                      | 6.4  | 7.4    | 8.5  | 9.8  | 3.5                                      | 4.7  | 5.7    | 7.0  | 8.2  | 0.9                                         | 1.3  | 1.7    | 2.1  | 2.5  |
| C07    | 1474 | 0.90          | 0.56                          | 0.66 | 0.78   | 0.88 | 0.95 | 8.3                                      | 11.3 | 14.0   | 16.8 | 19.9 | 7.5                                      | 9.4  | 10.5   | 11.5 | 12.6 | 0.5                                         | 1.3  | 3.1    | 5.6  | 8.8  |
| C09    | 1062 | 0.87          | 0.71                          | 0.78 | 0.83   | 0.89 | 0.95 | 6.7                                      | 8.6  | 10.7   | 12.4 | 14.2 | 5.6                                      | 7.7  | 8.9    | 10.0 | 11.0 | 0.4                                         | 1.0  | 1.5    | 2.7  | 3.9  |
| C10    | 1605 | 0.92          | 0.50                          | 0.60 | 0.67   | 0.75 | 0.86 | 6.3                                      | 7.8  | 9.1    | 10.8 | 13.5 | 3.4                                      | 4.8  | 6.4    | 8.0  | 9.3  | 1.3                                         | 2.2  | 3.0    | 3.8  | 4.7  |
| D01    | 1598 | 0.89          | 0.48                          | 0.62 | 0.72   | 0.81 | 0.90 | 5.8                                      | 7.7  | 9.3    | 11.3 | 13.6 | 2.9                                      | 4.8  | 7.2    | 8.9  | 10.2 | 0.9                                         | 2.0  | 2.7    | 3.3  | 4.0  |
| K01    | 1086 | 0.69          | 0.47                          | 0.49 | 0.51   | 0.53 | 0.56 | 12.7                                     | 14.0 | 15.1   | 16.4 | 17.6 | 6.3                                      | 7.1  | 7.8    | 8.4  | 9.0  | 6.0                                         | 6.7  | 7.3    | 8.0  | 8.9  |
| K02    | 1663 | 0.82          | 0.43                          | 0.44 | 0.46   | 0.48 | 0.50 | 13.1                                     | 14.1 | 15.1   | 16.3 | 17.4 | 5.7                                      | 6.4  | 7.1    | 7.6  | 8.1  | 7.1                                         | 7.6  | 8.1    | 8.7  | 9.5  |
| K03    | 1668 | 0.89          | 0.37                          | 0.45 | 0.49   | 0.54 | 0.59 | 9.5                                      | 10.8 | 12.3   | 14.2 | 16.8 | 3.6                                      | 5.0  | 6.3    | 7.5  | 8.4  | 4.9                                         | 5.6  | 6.2    | 7.0  | 8.6  |
| K07    | 1667 | 0.86          | 0.44                          | 0.49 | 0.53   | 0.60 | 0.69 | 8.7                                      | 10.1 | 12.4   | 15.6 | 19.0 | 4.4                                      | 5.9  | 7.2    | 8.1  | 8.9  | 3.1                                         | 4.3  | 5.4    | 7.6  | 10.6 |
| K13    | 1668 | 0.86          | 0.42                          | 0.49 | 0.55   | 0.63 | 0.72 | 7.9                                      | 9.4  | 11.5   | 14.9 | 19.0 | 3.7                                      | 5.4  | 7.2    | 8.3  | 9.3  | 2.7                                         | 3.8  | 5.0    | 6.6  | 10.6 |
| K17    | 1667 | 0.83          | 0.41                          | 0.44 | 0.47   | 0.51 | 0.57 | 10.2                                     | 11.6 | 13.7   | 16.4 | 18.6 | 4.6                                      | 5.7  | 6.8    | 7.5  | 8.5  | 4.9                                         | 5.8  | 7.1    | 8.8  | 10.5 |
| K19    | 1668 | 0.92          | 0.49                          | 0.54 | 0.59   | 0.67 | 0.77 | 7.8                                      | 9.4  | 11.1   | 13.5 | 17.8 | 4.5                                      | 5.8  | 7.1    | 8.3  | 9.3  | 2.2                                         | 3.2  | 4.4    | 5.9  | 8.7  |
| K21    | 1667 | 0.92          | 0.36                          | 0.52 | 0.67   | 0.78 | 0.89 | 4.7                                      | 7.4  | 12.5   | 16.8 | 20.5 | 2.2                                      | 5.3  | 8.3    | 10.2 | 12.5 | 1.1                                         | 2.0  | 3.0    | 6.0  | 12.4 |
| K21A   | 1522 | 0.86          | 0.25                          | 0.36 | 0.48   | 0.55 | 0.64 | 9.0                                      | 11.4 | 13.6   | 15.2 | 17.1 | 3.5                                      | 4.9  | 6.1    | 7.1  | 8.3  | 3.8                                         | 5.1  | 7.1    | 9.6  | 11.3 |
| K22    | 1667 | 0.92          | 0.47                          | 0.53 | 0.58   | 0.65 | 0.74 | 7.8                                      | 9.3  | 10.9   | 13.4 | 17.7 | 4.2                                      | 5.4  | 6.8    | 8.1  | 9.2  | 2.5                                         | 3.5  | 4.6    | 5.7  | 8.6  |
| K24    | 1580 | 0.79          | 0.44                          | 0.46 | 0.49   | 0.51 | 0.53 | 12.2                                     | 13.3 | 14.7   | 16.3 | 17.7 | 5.5                                      | 6.4  | 7.3    | 8.1  | 8.7  | 6.3                                         | 6.8  | 7.5    | 8.3  | 9.3  |
| K26    | 1668 | 0.81          | 0.46                          | 0.48 | 0.51   | 0.55 | 0.61 | 10.0                                     | 11.3 | 13.4   | 15.9 | 18.1 | 5.3                                      | 6.2  | 6.9    | 7.9  | 8.9  | 4.1                                         | 5.2  | 6.6    | 8.0  | 9.6  |
| K28    | 1669 | 0.88          | 0.47                          | 0.51 | 0.55   | 0.62 | 0.70 | 8.8                                      | 9.9  | 11.6   | 14.5 | 17.9 | 4.8                                      | 5.9  | 6.8    | 7.8  | 9.0  | 2.7                                         | 4.1  | 5.3    | 6.8  | 9.1  |
| K31    | 1667 | 0.92          | 0.48                          | 0.53 | 0.59   | 0.66 | 0.76 | 7.8                                      | 9.2  | 10.7   | 12.9 | 17.8 | 4.3                                      | 5.4  | 6.8    | 8.1  | 9.1  | 2.3                                         | 3.3  | 4.3    | 5.5  | 8.6  |
| K32    | 1667 | 0.91          | 0.40                          | 0.48 | 0.53   | 0.61 | 0.70 | 8.6                                      | 9.7  | 11.2   | 13.5 | 17.1 | 3.8                                      | 5.3  | 6.4    | 7.6  | 8.8  | 2.8                                         | 4.3  | 5.4    | 6.4  | 8.6  |
| M01    | 1550 | 0.89          | 0.54                          | 0.66 | 0.76   | 0.83 | 0.90 | 5.0                                      | 6.3  | 7.6    | 9.8  | 12.0 | 2.8                                      | 4.2  | 5.9    | 8.1  | 9.8  | 0.8                                         | 1.4  | 2.0    | 2.5  | 3.0  |
| P01    | 1666 | 0.93          | 0.56                          | 0.67 | 0.78   | 0.87 | 0.95 | 14.6                                     | 17.0 | 19.3   | 21.2 | 23.6 | 12.3                                     | 13.1 | 14.3   | 15.5 | 17.4 | 0.8                                         | 2.2  | 4.1    | 7.0  | 10.1 |
| S01    | 1668 | 0.91          | 0.54                          | 0.62 | 0.69   | 0.76 | 0.85 | 6.4                                      | 7.9  | 9.5    | 11.6 | 15.0 | 3.9                                      | 5.3  | 6.9    | 8.4  | 9.4  | 1.3                                         | 2.1  | 2.8    | 3.9  | 6.0  |
| S02    | 1667 | 0.89          | 0.51                          | 0.62 | 0.70   | 0.79 | 0.90 | 6.2                                      | 8.1  | 10.9   | 14.0 | 18.0 | 3.4                                      | 5.6  | 8.4    | 10.4 | 11.7 | 1.1                                         | 2.1  | 3.0    | 4.1  | 7.1  |
| S03    | 1667 | 0.91          | 0.45                          | 0.57 | 0.64   | 0.73 | 0.82 | 6.7                                      | 8.3  | 10.4   | 13.8 | 18.0 | 3.6                                      | 5.0  | 7.3    | 9.4  | 10.6 | 1.6                                         | 2.6  | 3.7    | 5.0  | 8.0  |

**Table S2.** Statistical summary of the spring discharge – effective precipitation cross-correlation analysis results.

| Spring | Correlation peak value |      |        |      |      | Time lag to correlation peak (months) |      |        |      |      | Cumulative precipitation time window (months) |      |        |      |      | Mean response time of spring to precipitation (months) |      |        |      |      |
|--------|------------------------|------|--------|------|------|---------------------------------------|------|--------|------|------|-----------------------------------------------|------|--------|------|------|--------------------------------------------------------|------|--------|------|------|
|        | P5%                    | P25% | median | P75% | P95% | P5%                                   | P25% | median | P75% | P95% | P5%                                           | P25% | median | P75% | P95% | P5%                                                    | P25% | median | P75% | P95% |
| B01    | 0.76                   | 0.83 | 0.87   | 0.90 | 0.92 | 0                                     | 0    | 0      | 0    | 1    | 8                                             | 10   | 11     | 21   | 47   | 5                                                      | 5    | 6      | 11   | 23   |
| B02    | 0.42                   | 0.57 | 0.70   | 0.80 | 0.94 | 0                                     | 0    | 0      | 0    | 22   | 6                                             | 13   | 14     | 32   | 54   | 3                                                      | 7    | 7      | 16   | 36   |
| B03    | 0.69                   | 0.79 | 0.83   | 0.87 | 0.91 | 0                                     | 0    | 0      | 1    | 2    | 9                                             | 10   | 17     | 20   | 46   | 5                                                      | 6    | 9      | 10   | 23   |
| B06    | 0.64                   | 0.69 | 0.74   | 0.80 | 0.86 | 0                                     | 0    | 0      | 0    | 2    | 2                                             | 6    | 9      | 30   | 46   | 2                                                      | 3    | 8      | 15   | 23   |
| B07    | 0.71                   | 0.77 | 0.82   | 0.89 | 0.92 | 0                                     | 0    | 0      | 0    | 1    | 7                                             | 8    | 10     | 19   | 32   | 4                                                      | 4    | 5      | 10   | 16   |
| B09    | 0.67                   | 0.78 | 0.85   | 0.88 | 0.91 | 0                                     | 0    | 0      | 0    | 0    | 3                                             | 4    | 4      | 15   | 41   | 2                                                      | 2    | 2      | 8    | 20   |
| B10    | 0.73                   | 0.77 | 0.80   | 0.85 | 0.91 | 0                                     | 0    | 0      | 0    | 1    | 8                                             | 12   | 16     | 29   | 35   | 4                                                      | 6    | 8      | 14   | 17   |
| C01    | 0.70                   | 0.78 | 0.87   | 0.92 | 0.93 | 0                                     | 0    | 0      | 1    | 3    | 10                                            | 17   | 24     | 37   | 49   | 5                                                      | 11   | 12     | 19   | 26   |
| C03    | 0.68                   | 0.80 | 0.85   | 0.95 | 0.98 | 0                                     | 0    | 0      | 1    | 5    | 13                                            | 24   | 25     | 36   | 52   | 9                                                      | 13   | 13     | 18   | 26   |
| C04    | 0.74                   | 0.80 | 0.85   | 0.91 | 0.95 | 0                                     | 0    | 0      | 0    | 2    | 11                                            | 15   | 24     | 35   | 49   | 6                                                      | 8    | 13     | 18   | 24   |
| C05    | 0.73                   | 0.81 | 0.85   | 0.91 | 0.95 | 0                                     | 0    | 1      | 3    | 4    | 16                                            | 23   | 24     | 36   | 49   | 9                                                      | 12   | 14     | 18   | 25   |
| C07    | 0.62                   | 0.79 | 0.84   | 0.89 | 0.97 | 0                                     | 0    | 1      | 2    | 4    | 11                                            | 22   | 36     | 48   | 49   | 6                                                      | 11   | 18     | 25   | 26   |
| C09    | 0.58                   | 0.70 | 0.77   | 0.82 | 0.89 | 0                                     | 0    | 0      | 1    | 1    | 11                                            | 16   | 26     | 47   | 56   | 6                                                      | 8    | 13     | 24   | 28   |
| C10    | 0.78                   | 0.81 | 0.84   | 0.87 | 0.89 | 0                                     | 0    | 0      | 0    | 0    | 6                                             | 7    | 17     | 28   | 53   | 3                                                      | 4    | 8      | 14   | 27   |
| D01    | 0.69                   | 0.77 | 0.83   | 0.88 | 0.96 | 0                                     | 0    | 1      | 2    | 6    | 12                                            | 12   | 23     | 32   | 51   | 7                                                      | 8    | 12     | 17   | 26   |
| K01    | 0.70                   | 0.83 | 0.86   | 0.89 | 0.92 | 0                                     | 0    | 0      | 1    | 4    | 11                                            | 12   | 24     | 24   | 49   | 6                                                      | 8    | 12     | 12   | 24   |
| K02    | 0.74                   | 0.80 | 0.88   | 0.91 | 0.96 | 0                                     | 0    | 1      | 2    | 5    | 12                                            | 19   | 25     | 38   | 42   | 8                                                      | 10   | 13     | 19   | 21   |
| K03    | 0.61                   | 0.71 | 0.83   | 0.92 | 0.96 | 0                                     | 0    | 1      | 5    | 9    | 12                                            | 23   | 25     | 46   | 59   | 9                                                      | 12   | 13     | 24   | 34   |
| K07    | 0.54                   | 0.79 | 0.87   | 0.91 | 0.96 | 0                                     | 0    | 0      | 0    | 10   | 12                                            | 24   | 26     | 37   | 44   | 10                                                     | 13   | 17     | 19   | 22   |
| K13    | 0.66                   | 0.77 | 0.85   | 0.91 | 0.96 | 0                                     | 0    | 0      | 7    | 10   | 12                                            | 24   | 24     | 37   | 48   | 10                                                     | 12   | 15     | 19   | 24   |
| K17    | 0.66                   | 0.76 | 0.82   | 0.87 | 0.96 | 0                                     | 0    | 0      | 3    | 8    | 11                                            | 23   | 35     | 48   | 50   | 8                                                      | 15   | 18     | 25   | 28   |
| K19    | 0.71                   | 0.80 | 0.87   | 0.90 | 0.95 | 0                                     | 0    | 0      | 2    | 8    | 16                                            | 24   | 31     | 40   | 47   | 10                                                     | 14   | 16     | 20   | 24   |
| K21    | 0.69                   | 0.79 | 0.87   | 0.92 | 0.96 | 0                                     | 0    | 0      | 1    | 10   | 21                                            | 24   | 29     | 40   | 49   | 12                                                     | 14   | 16     | 20   | 25   |
| K21A   | 0.62                   | 0.74 | 0.82   | 0.89 | 0.97 | 0                                     | 0    | 1      | 9    | 14   | 13                                            | 22   | 37     | 50   | 50   | 14                                                     | 15   | 20     | 25   | 25   |
| K22    | 0.70                   | 0.79 | 0.86   | 0.89 | 0.95 | 0                                     | 0    | 0      | 1    | 4    | 12                                            | 19   | 28     | 34   | 43   | 7                                                      | 10   | 14     | 17   | 22   |
| K24    | 0.68                   | 0.85 | 0.90   | 0.94 | 0.97 | 0                                     | 0    | 0      | 2    | 3    | 23                                            | 24   | 24     | 25   | 47   | 12                                                     | 12   | 13     | 14   | 24   |
| K26    | 0.35                   | 0.72 | 0.85   | 0.93 | 0.96 | 0                                     | 0    | 0      | 4    | 25   | 13                                            | 24   | 35     | 44   | 49   | 9                                                      | 14   | 18     | 22   | 37   |
| K28    | 0.66                   | 0.79 | 0.87   | 0.92 | 0.97 | 0                                     | 0    | 0      | 3    | 6    | 23                                            | 24   | 36     | 47   | 55   | 12                                                     | 14   | 18     | 24   | 29   |
| K31    | 0.74                   | 0.81 | 0.86   | 0.92 | 0.97 | 0                                     | 0    | 0      | 3    | 7    | 23                                            | 25   | 36     | 44   | 48   | 12                                                     | 14   | 18     | 22   | 26   |
| K32    | 0.62                   | 0.81 | 0.87   | 0.92 | 0.95 | 0                                     | 0    | 0      | 0    | 4    | 17                                            | 24   | 25     | 36   | 48   | 9                                                      | 13   | 14     | 18   | 26   |
| M01    | 0.87                   | 0.88 | 0.90   | 0.91 | 0.93 | 0                                     | 0    | 0      | 0    | 1    | 6                                             | 8    | 19     | 20   | 31   | 3                                                      | 4    | 10     | 10   | 15   |
| S      | 0.75                   | 0.85 | 0.90   | 0.94 | 0.97 | 0                                     | 0    | 0      | 1    | 2    | 18                                            | 23   | 24     | 30   | 47   | 10                                                     | 12   | 13     | 15   | 24   |

**Table S3.** Average physicochemical characteristics of spring waters.

| Spring | O <sub>2</sub> | pH      | EC <sup>(25°C)</sup> | SiO <sub>2</sub> | Na <sup>+</sup> | K <sup>+</sup> | Mg <sup>2+</sup> | Ca <sup>2+</sup> | Cl <sup>-</sup> | SO <sub>4</sub> <sup>2-</sup> | HCO <sub>3</sub> <sup>-</sup> | TDS  |
|--------|----------------|---------|----------------------|------------------|-----------------|----------------|------------------|------------------|-----------------|-------------------------------|-------------------------------|------|
|        | mg/L           | pH unit | μS/cm                | mg/L             | mg/L            | mg/L           | mg/L             | mg/L             | mg/L            | mg/L                          | mg/L                          | mg/L |
| B01    | 7.57           | 7.15    | 994                  | 8.29             | 33.9            | 1.46           | 2.95             | 171.8            | 89.3            | 48.6                          | 374                           | 730  |
| B02    | 6.25           | 7.20    | 1122                 | 8.91             | 42.9            | 2.30           | 3.53             | 189.8            | 113.8           | 105.2                         | 352                           | 818  |
| B03    | 9.18           | 7.44    | 780                  | 8.04             | 22.9            | 1.18           | 1.88             | 140.5            | 51.0            | 33.8                          | 335                           | 594  |
| B06    | 4.65           | 7.33    | 962                  | 7.24             | 30.9            | 1.34           | 10.93            | 151.6            | 110.6           | 87.2                          | 283                           | 682  |
| B07    | 10.47          | 7.79    | 418                  | 6.01             | 3.3             | 0.37           | 1.14             | 83.9             | 5.8             | 31.5                          | 206                           | 339  |
| B09    | 6.65           | 7.26    | 763                  | 8.61             | 14.3            | 1.99           | 4.48             | 146.0            | 22.9            | 66.9                          | 360                           | 625  |
| B10    | 10.30          | 7.55    | 569                  | 6.97             | 6.9             | 0.90           | 1.47             | 111.7            | 16.6            | 22.0                          | 274                           | 440  |
| C01    | 9.57           | 7.55    | 587                  | 6.63             | 12.3            | 0.59           | 1.36             | 108.8            | 34.8            | 37.7                          | 247                           | 449  |
| C03    | 10.57          | 7.72    | 623                  | 6.63             | 22.7            | 0.65           | 1.24             | 106.8            | 41.4            | 37.9                          | 260                           | 477  |
| C04    | 10.13          | 7.55    | 606                  | 6.56             | 17.4            | 0.59           | 1.30             | 109.4            | 34.3            | 39.8                          | 261                           | 470  |
| C05    | 10.51          | 7.66    | 603                  | 6.55             | 16.7            | 0.56           | 1.02             | 109.2            | 34.2            | 39.5                          | 255                           | 463  |
| C07    | 10.59          | 7.81    | 591                  | 6.45             | 17.7            | 0.60           | 0.93             | 105.0            | 39.3            | 37.8                          | 243                           | 451  |
| C09    | 10.33          | 7.70    | 607                  | 6.69             | 21.8            | 0.57           | 1.31             | 105.9            | 37.9            | 28.6                          | 272                           | 475  |
| C10    | 7.45           | 7.51    | 583                  | 6.75             | 8.8             | 0.90           | 6.36             | 105.9            | 18.8            | 48.2                          | 263                           | 459  |
| D01    | 10.34          | 7.67    | 565                  | 6.73             | 5.8             | 0.63           | 1.27             | 113.3            | 11.4            | 50.0                          | 252                           | 441  |
| K01    | 9.74           | 7.47    | 699                  | 7.17             | 16.2            | 1.18           | 2.61             | 125.3            | 44.5            | 54.5                          | 259                           | 511  |
| K02    | 9.56           | 7.51    | 648                  | 6.89             | 9.6             | 0.81           | 2.21             | 122.4            | 27.1            | 48.8                          | 251                           | 469  |
| K03    | 7.94           | 7.41    | 619                  | 6.74             | 7.7             | 0.73           | 2.12             | 118.7            | 21.3            | 46.5                          | 247                           | 451  |
| K07    | 8.81           | 7.48    | 577                  | 6.85             | 4.5             | 0.65           | 1.86             | 115.2            | 9.4             | 48.0                          | 247                           | 433  |
| K13    | 9.44           | 7.56    | 569                  | 6.89             | 4.5             | 0.60           | 1.17             | 114.1            | 9.3             | 46.5                          | 242                           | 426  |
| K17    | 9.93           | 7.63    | 601                  | 6.57             | 4.8             | 0.57           | 0.95             | 118.2            | 11.6            | 46.4                          | 230                           | 419  |
| K19    | 7.86           | 7.53    | 586                  | 6.85             | 4.7             | 0.64           | 1.80             | 115.6            | 9.8             | 49.3                          | 242                           | 431  |
| K21    | 5.76           | 7.46    | 591                  | 6.50             | 4.5             | 0.95           | 7.05             | 108.1            | 10.4            | 58.6                          | 228                           | 424  |
| K21A   | 10.12          | 7.61    | 586                  | 6.45             | 5.0             | 0.52           | 0.87             | 113.7            | 11.4            | 40.0                          | 215                           | 393  |
| K22    | 10.04          | 7.55    | 533                  | 6.69             | 5.8             | 0.53           | 1.35             | 104.7            | 12.7            | 31.5                          | 244                           | 408  |
| K24    | 9.35           | 7.56    | 645                  | 7.11             | 13.4            | 0.87           | 2.68             | 117.4            | 30.0            | 45.5                          | 256                           | 473  |
| K26    | 9.09           | 7.51    | 665                  | 7.15             | 15.0            | 0.84           | 2.13             | 120.2            | 33.5            | 44.4                          | 257                           | 480  |
| K28    | 9.57           | 7.58    | 672                  | 7.42             | 15.4            | 0.89           | 2.05             | 121.6            | 33.8            | 46.1                          | 258                           | 485  |
| K31    | 8.71           | 7.56    | 690                  | 7.31             | 18.5            | 1.05           | 2.10             | 122.3            | 38.9            | 47.1                          | 262                           | 499  |
| K32    | 9.91           | 7.61    | 616                  | 7.51             | 10.3            | 0.98           | 1.97             | 117.1            | 20.5            | 42.5                          | 266                           | 467  |
| M01    | 6.36           | 7.46    | 856                  | 6.58             | 19.2            | 1.48           | 8.85             | 152.0            | 47.3            | 111.9                         | 303                           | 650  |
| P01    | 7.97           | 7.55    | 792                  | 7.81             | 27.0            | 1.21           | 3.90             | 131.5            | 69.5            | 60.5                          | 257                           | 559  |
| S01    | 9.29           | 7.58    | 651                  | 7.39             | 13.5            | 0.69           | 1.90             | 122.1            | 32.0            | 58.4                          | 271                           | 507  |
| S02    | 9.15           | 7.56    | 753                  | 7.35             | 22.5            | 1.45           | 2.02             | 134.1            | 42.4            | 118.9                         | 245                           | 573  |
| S03    | 8.57           | 7.57    | 734                  | 7.58             | 21.1            | 1.16           | 2.36             | 129.8            | 44.8            | 84.7                          | 262                           | 553  |



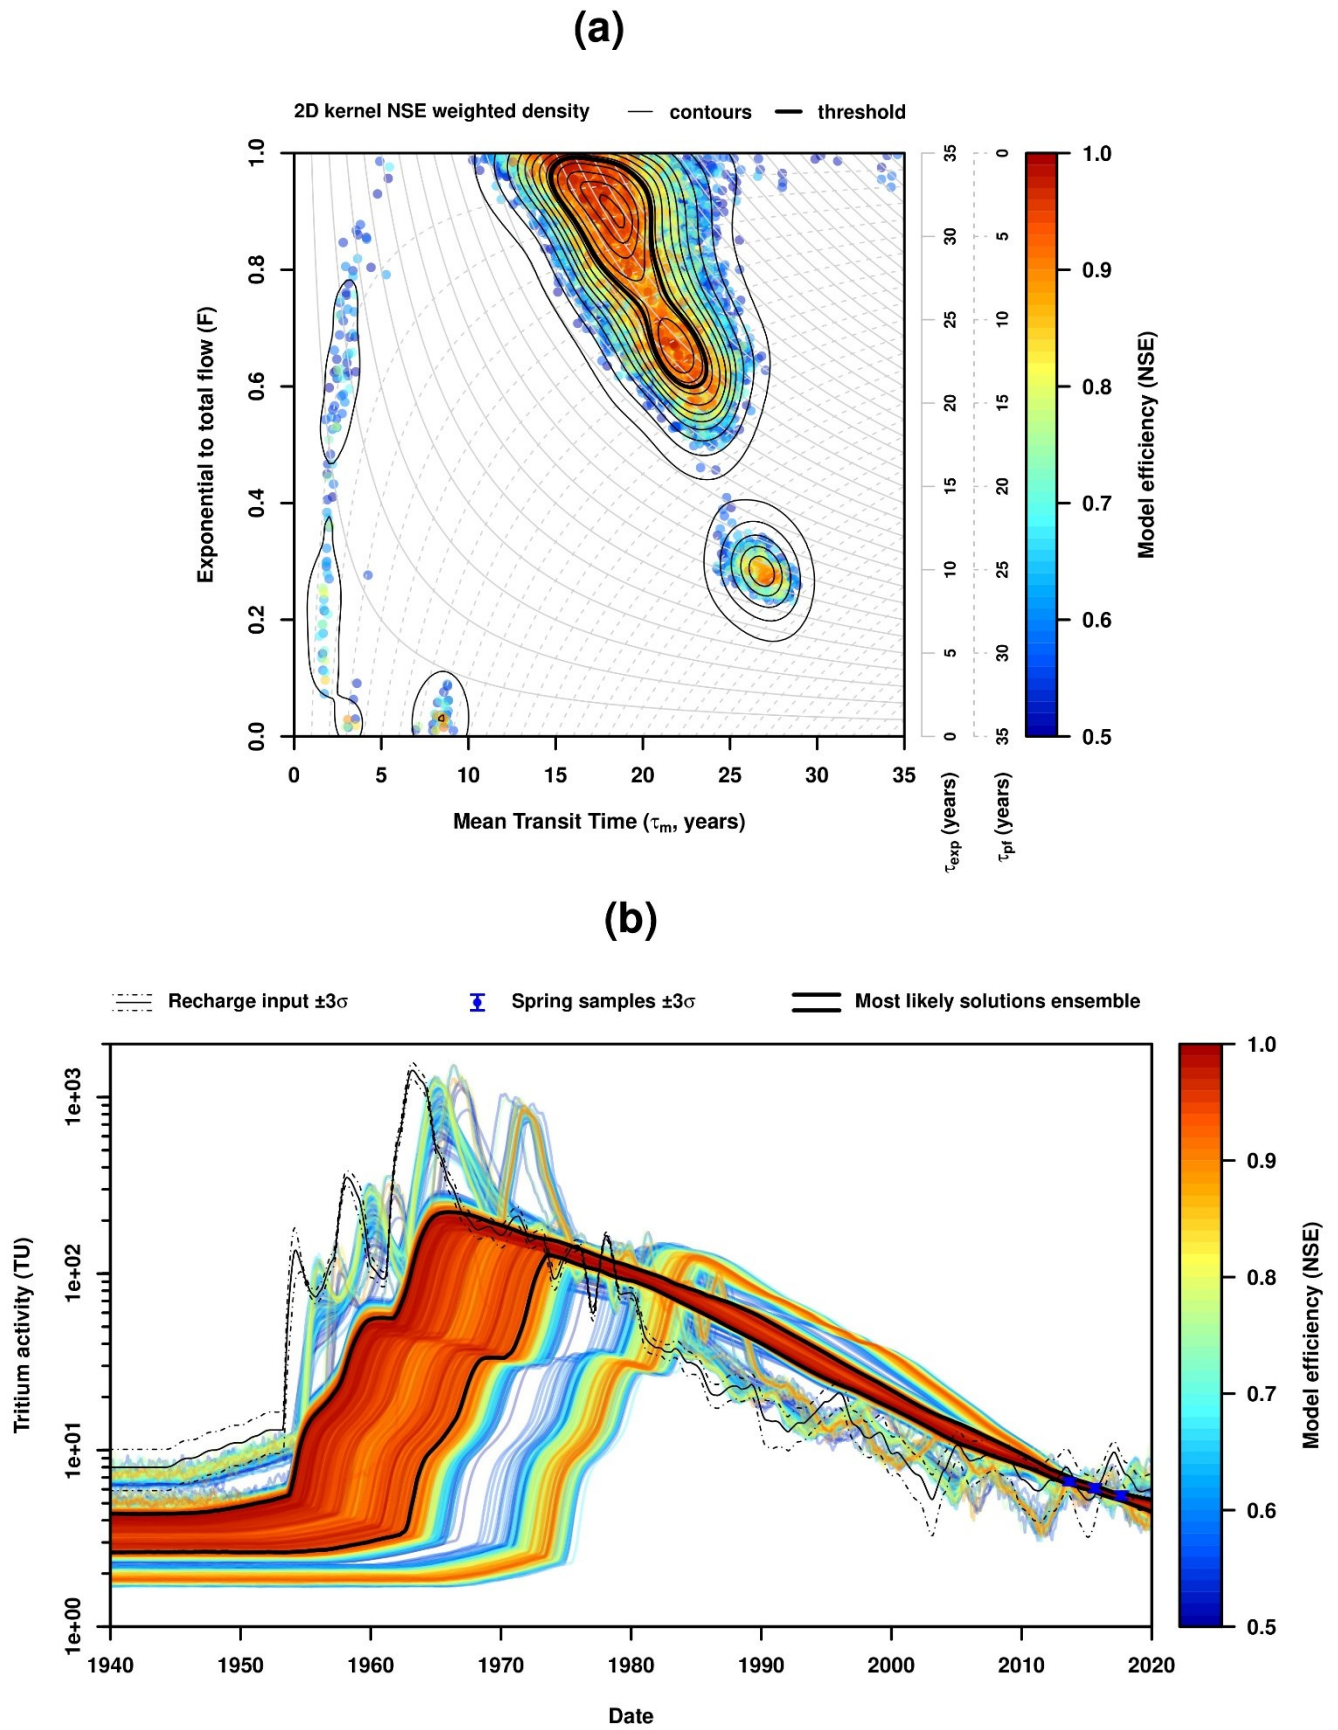

Figure S1: Modelling results of spring B01 in the EPM parameter space (a) and associated modelled tritium time-series (b).

(a)

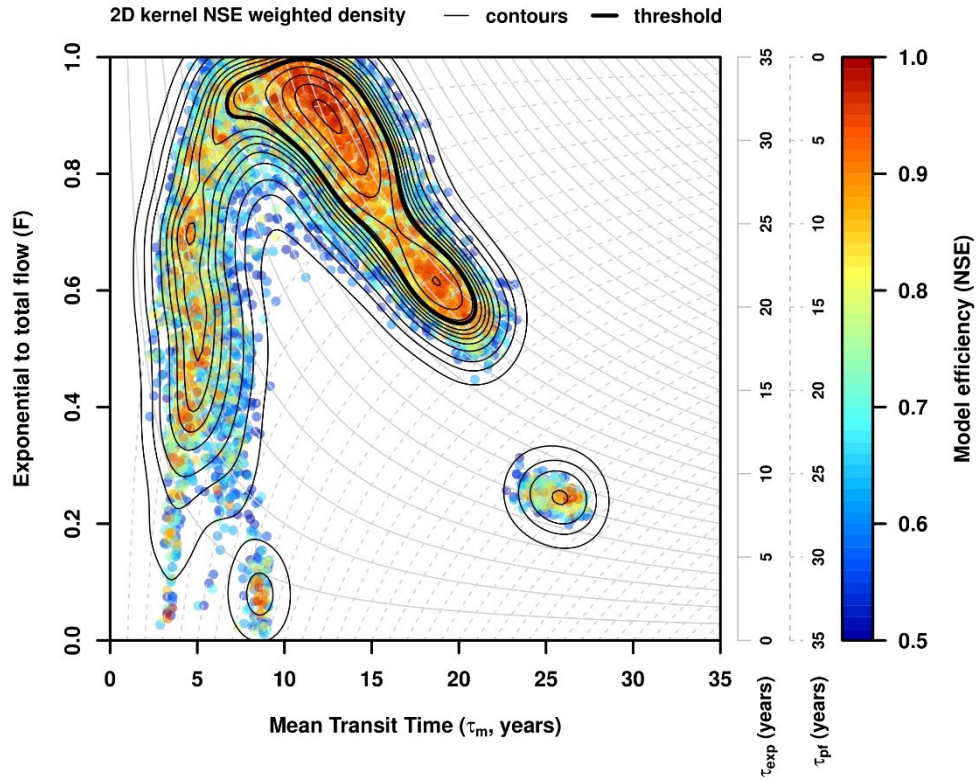

(b)

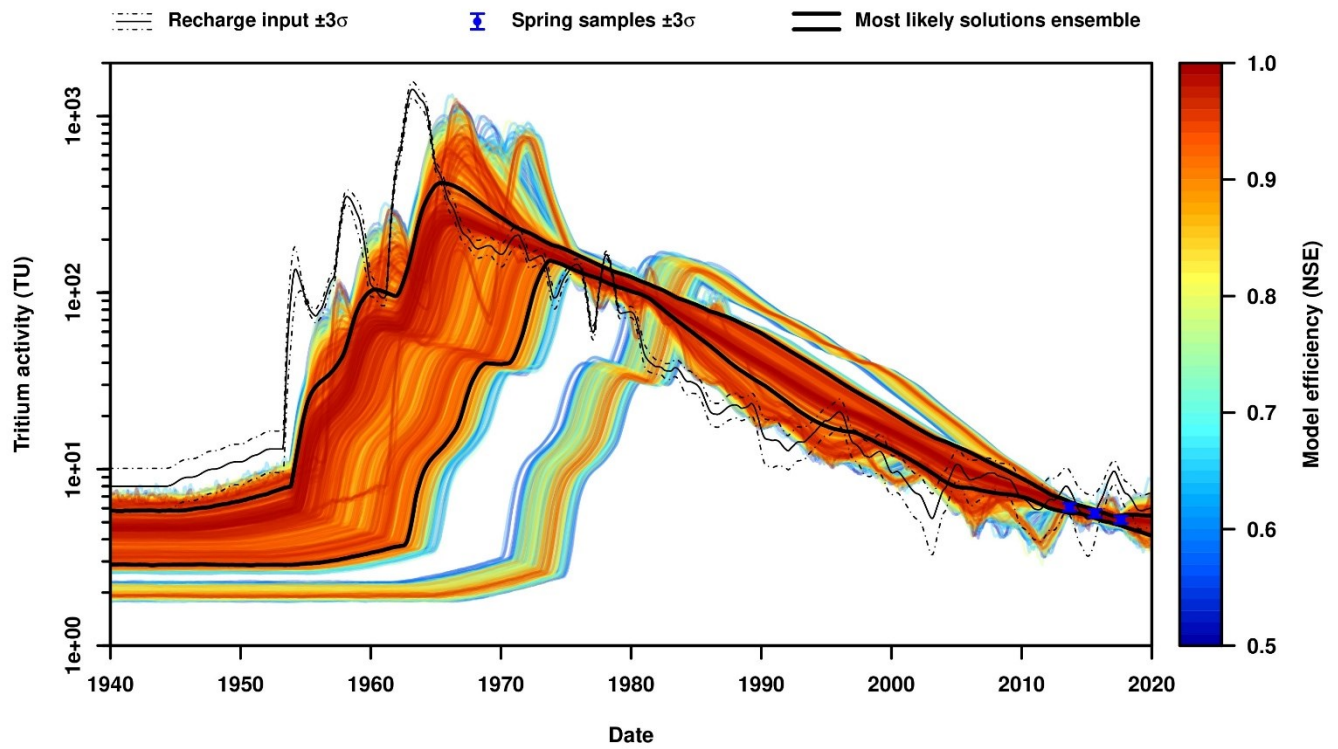

Figure S2: Modelling results of spring B02 in the EPM parameter space (a) and associated modelled tritium time-series (b).

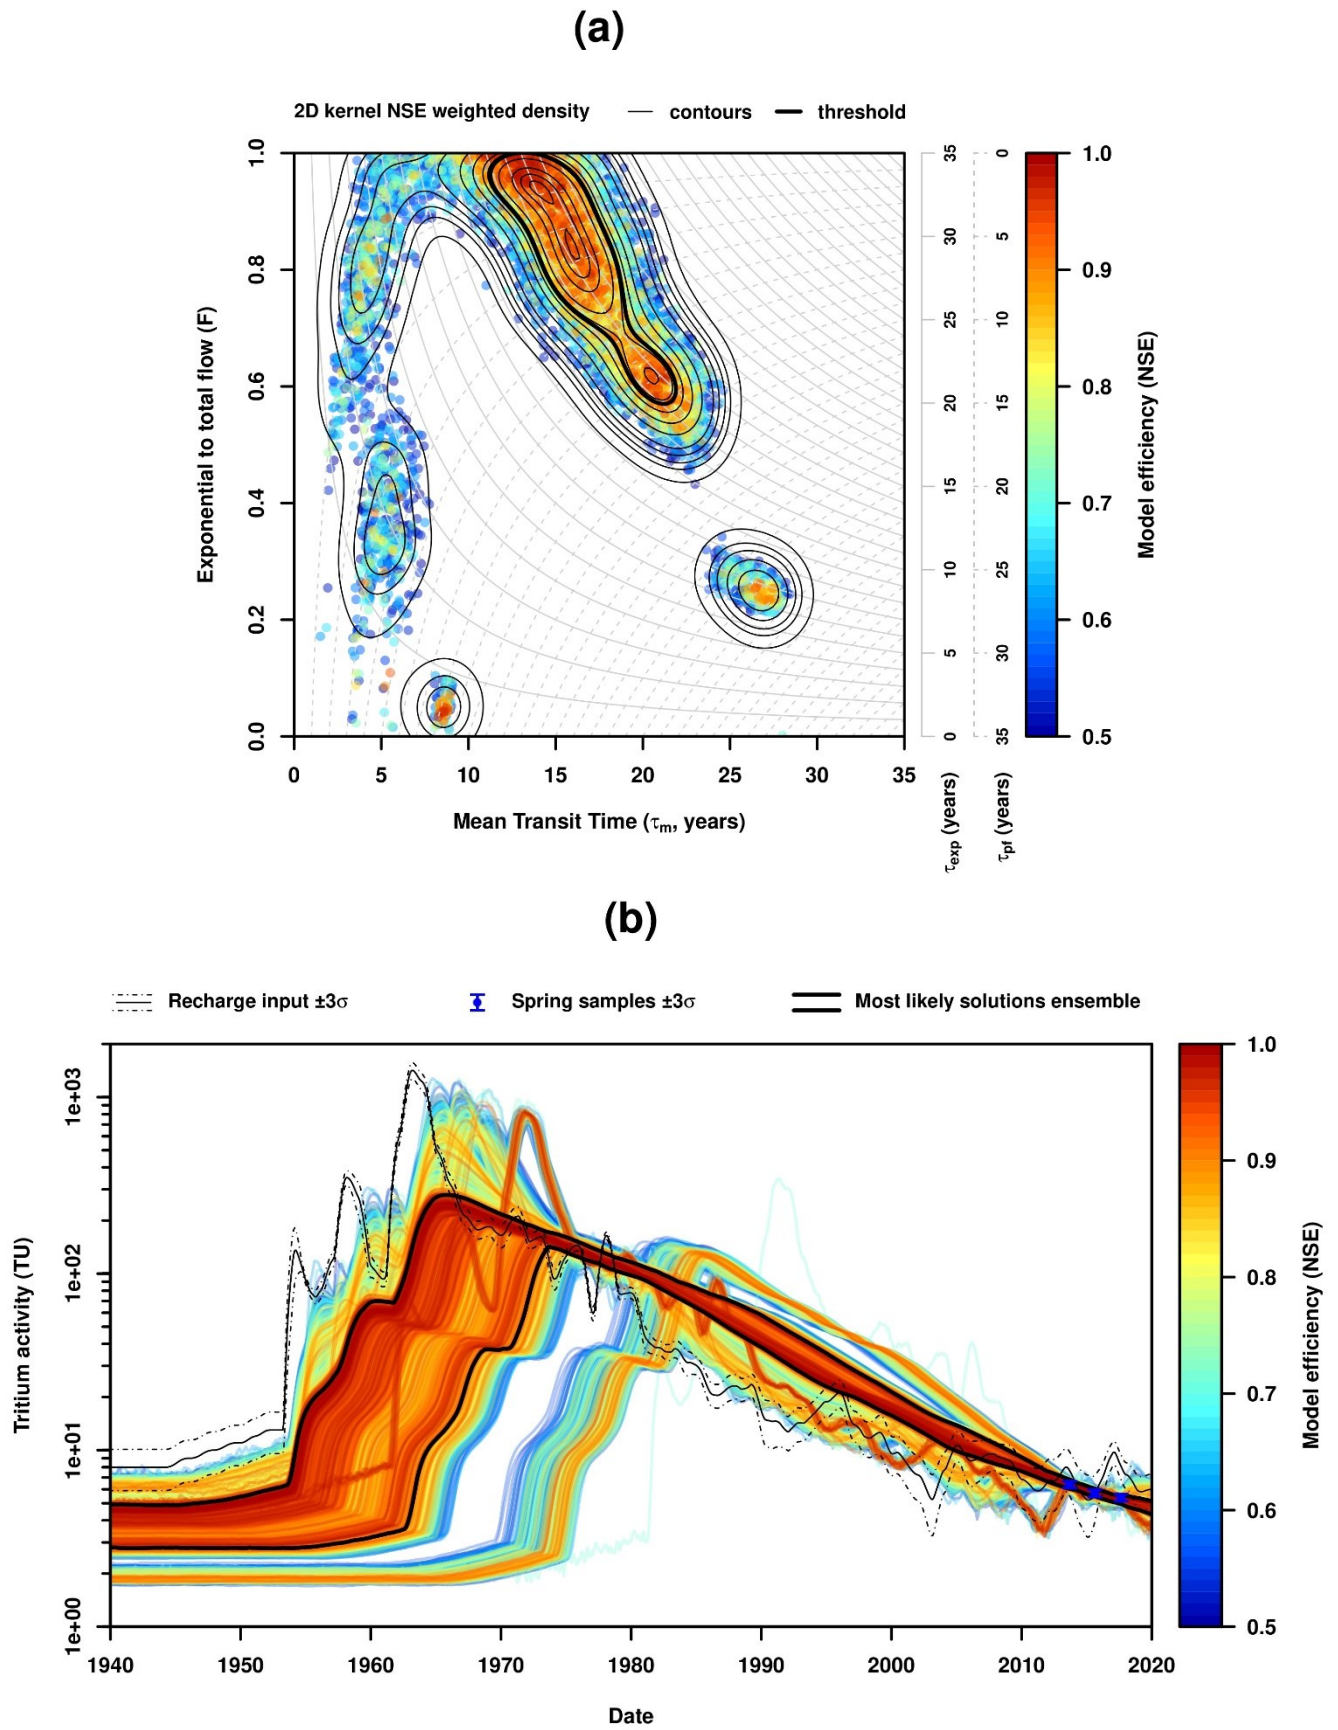

Figure S3: Modelling results of spring B03 in the EPM parameter space (a) and associated modelled tritium time-series (b).



(a)

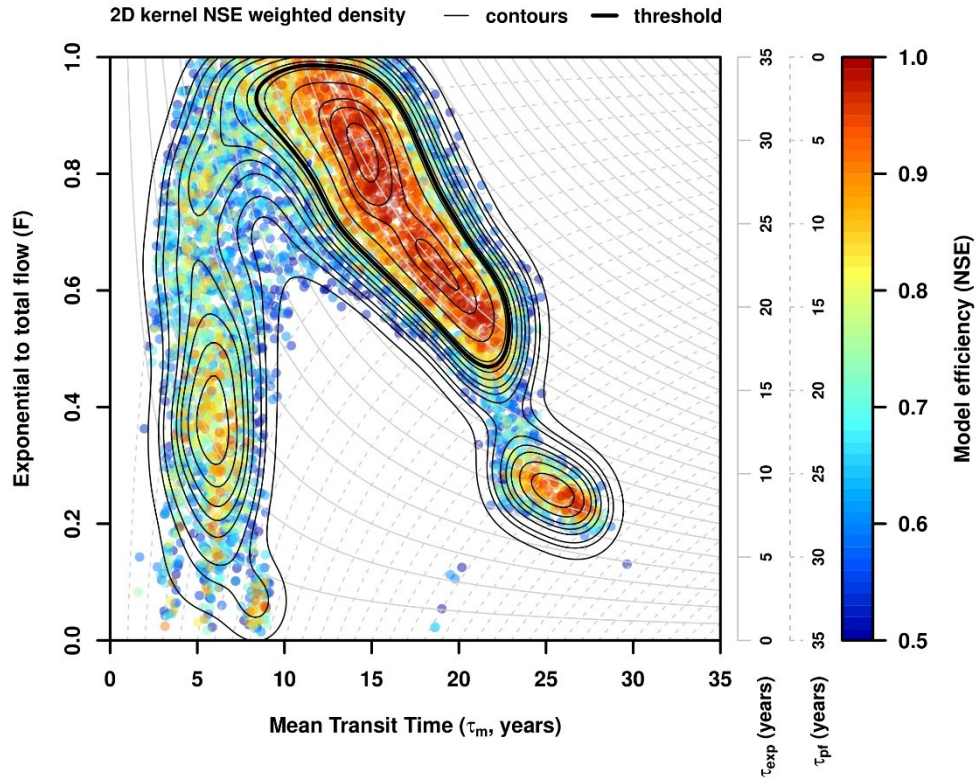

(b)

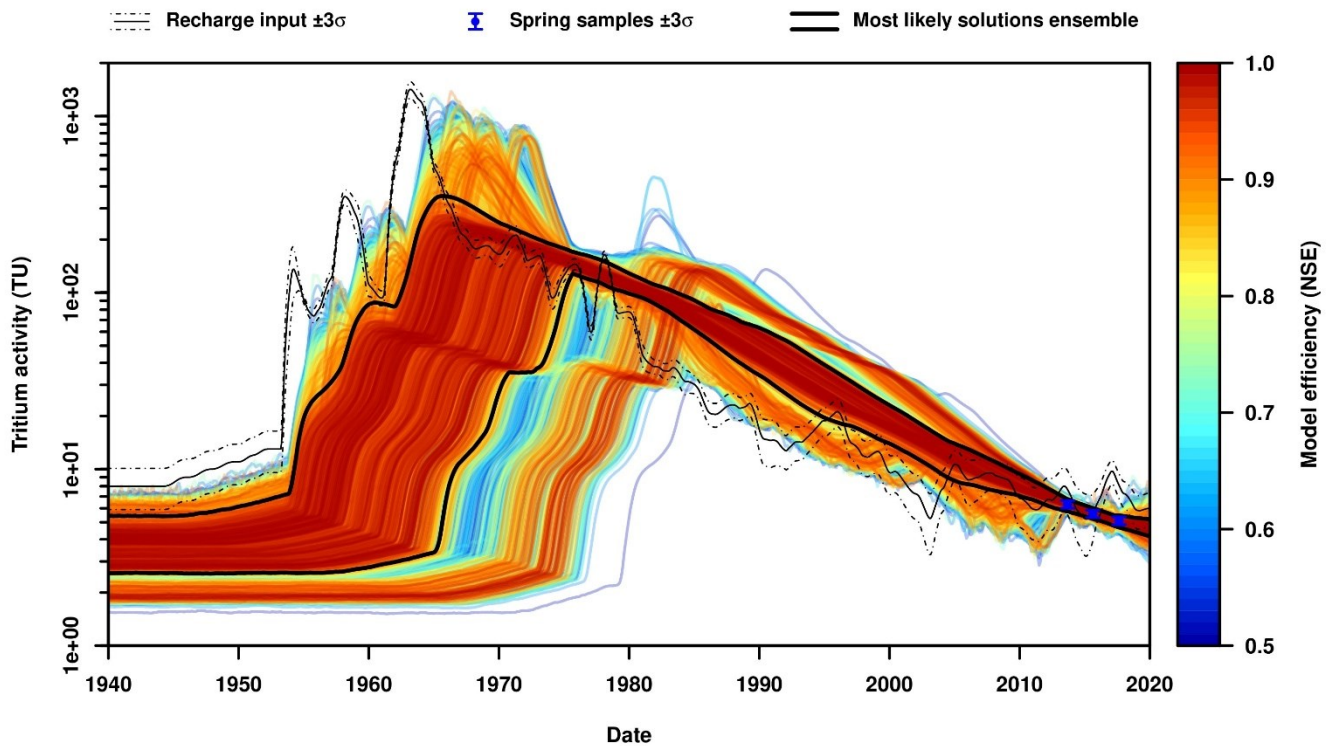

Figure S4: Modelling results of spring B06 in the EPM parameter space (a) and associated modelled tritium time-series (b).

(a)

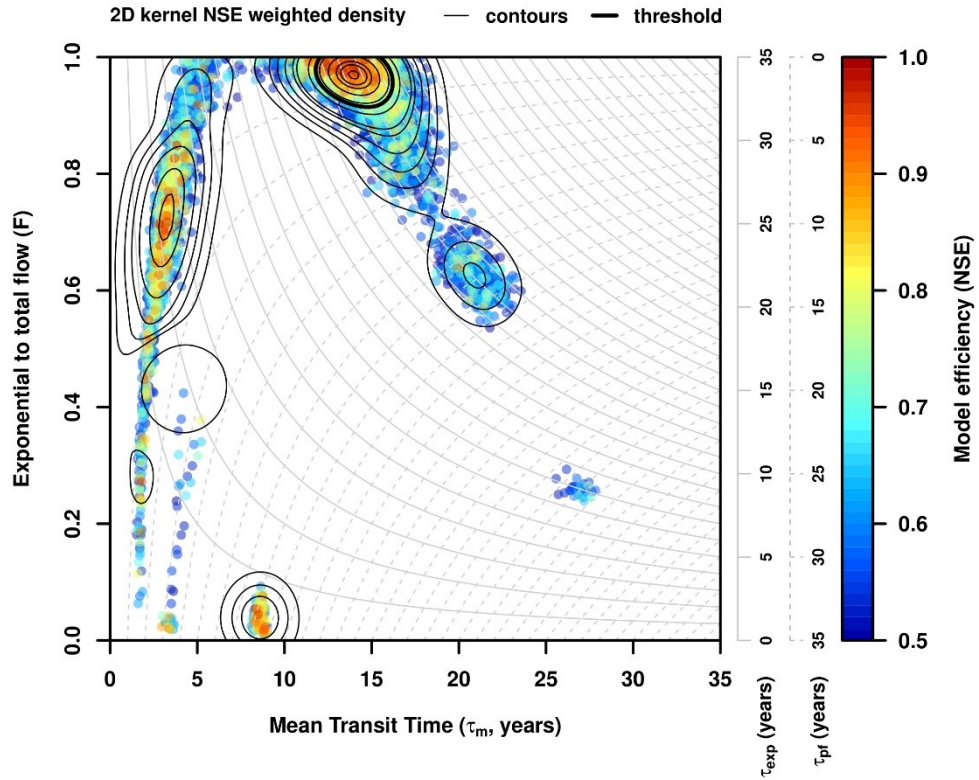

(b)

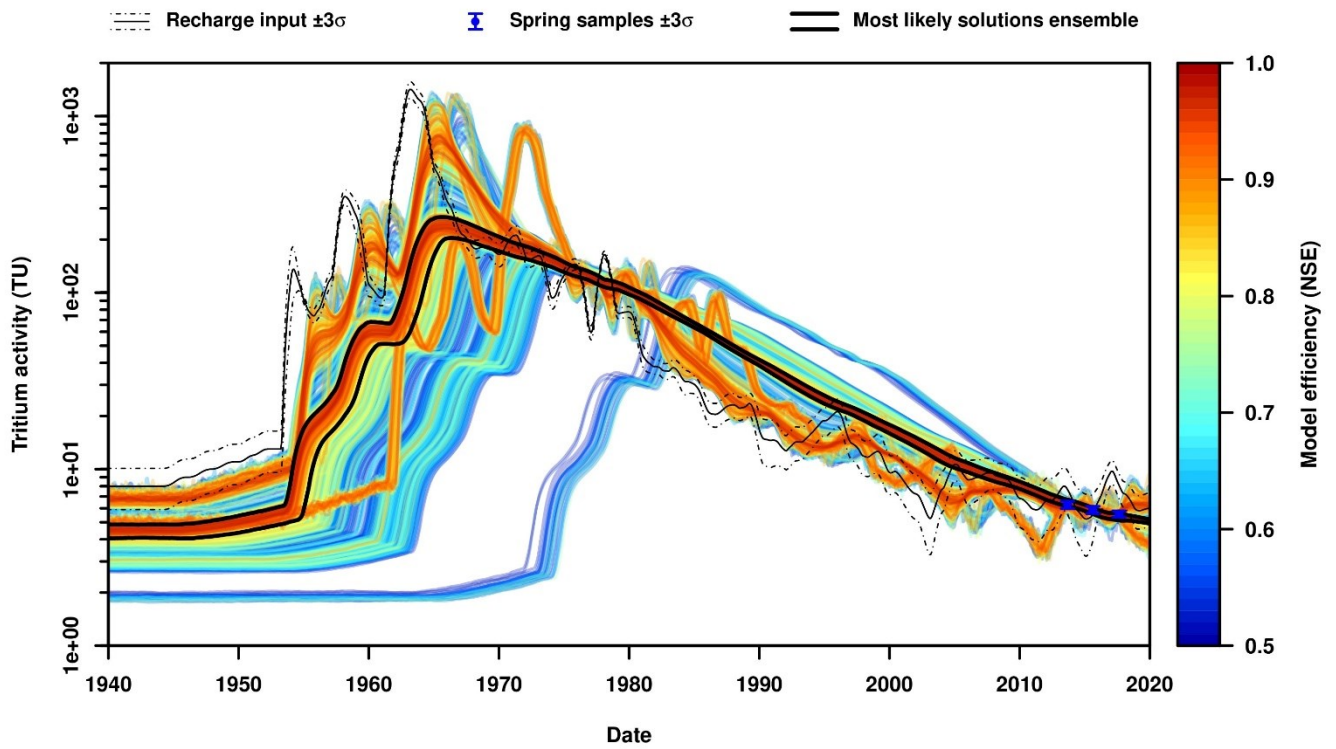

Figure S5: Modelling results of spring B07 in the EPM parameter space (a) and associated modelled tritium time-series (b).

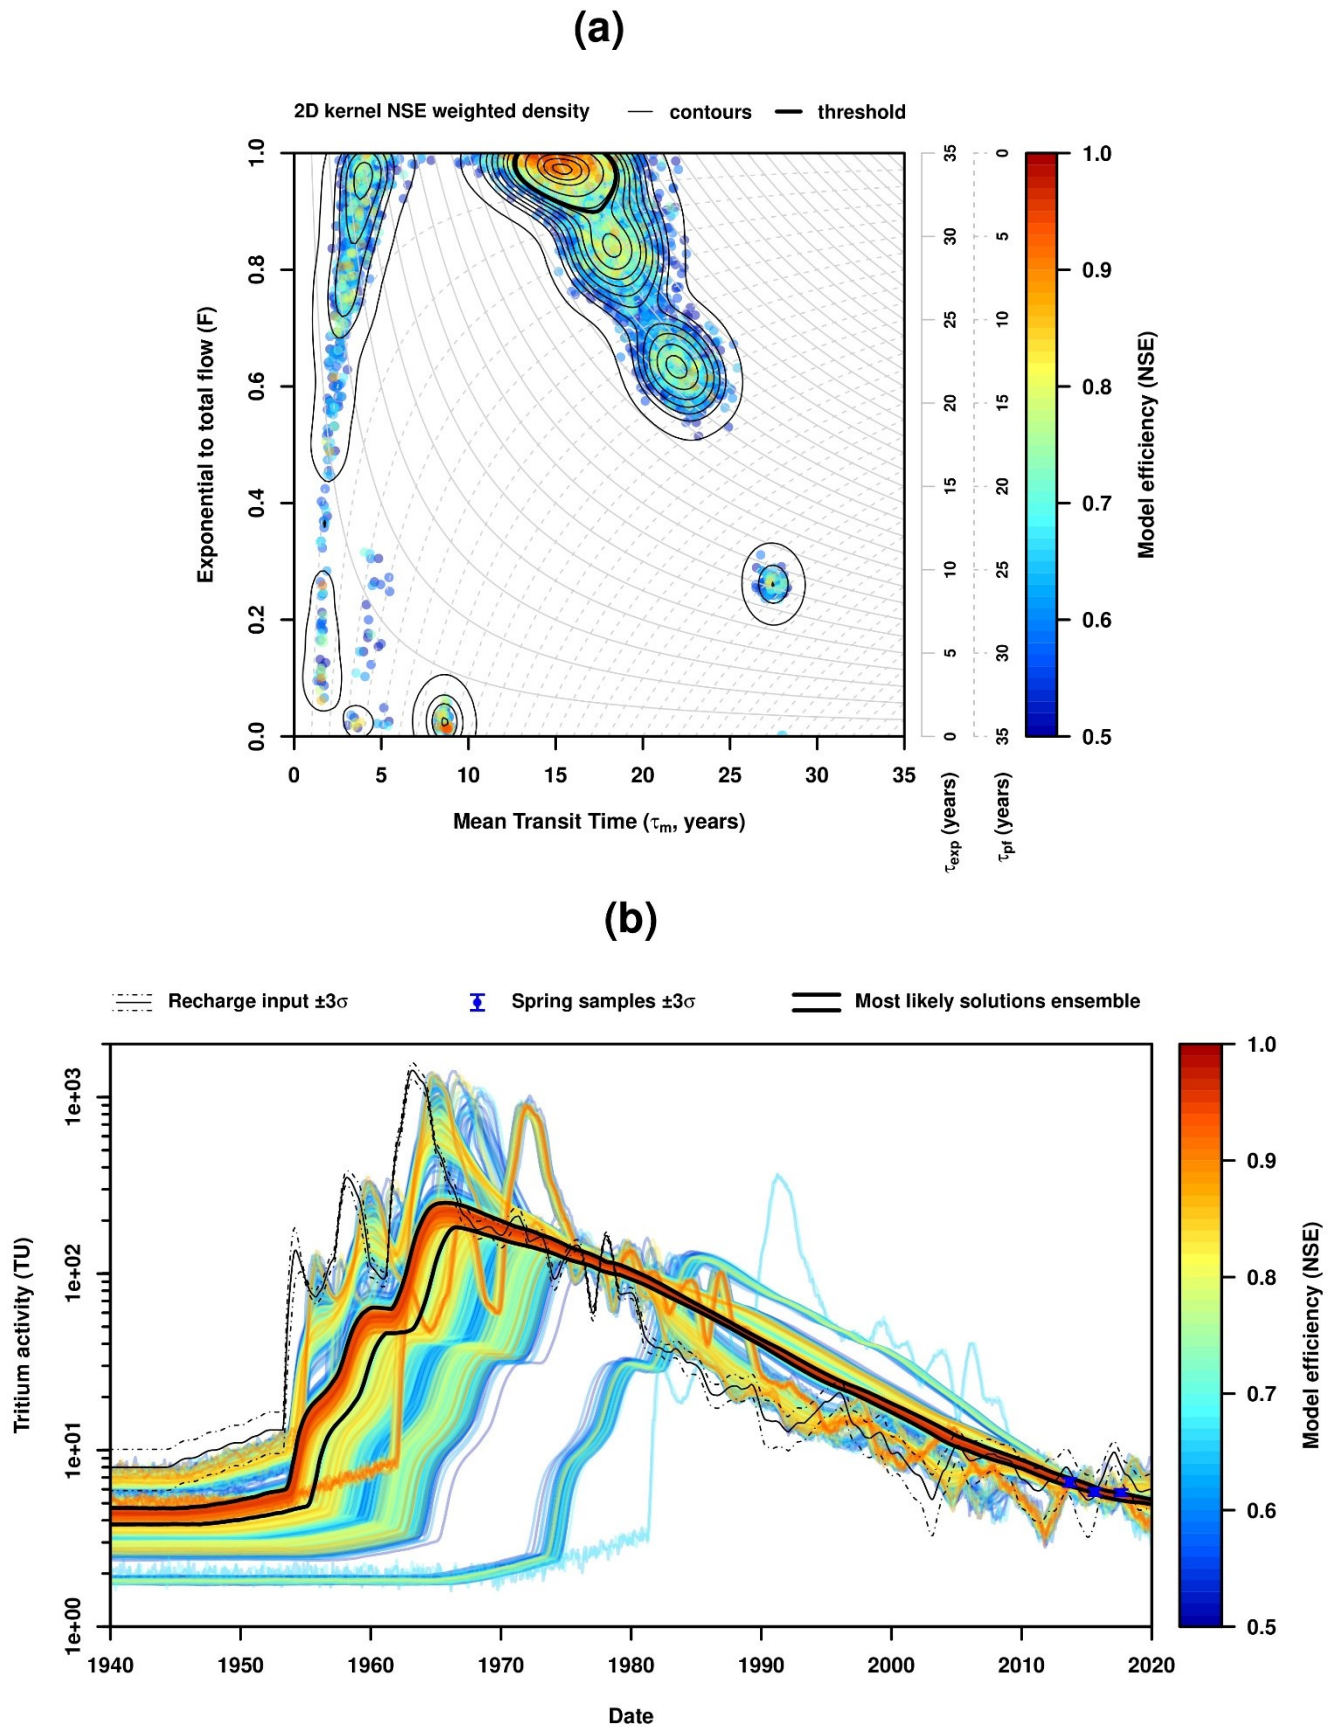

Figure S6: Modelling results of spring B09 in the EPM parameter space (a) and associated modelled tritium time-series (b).



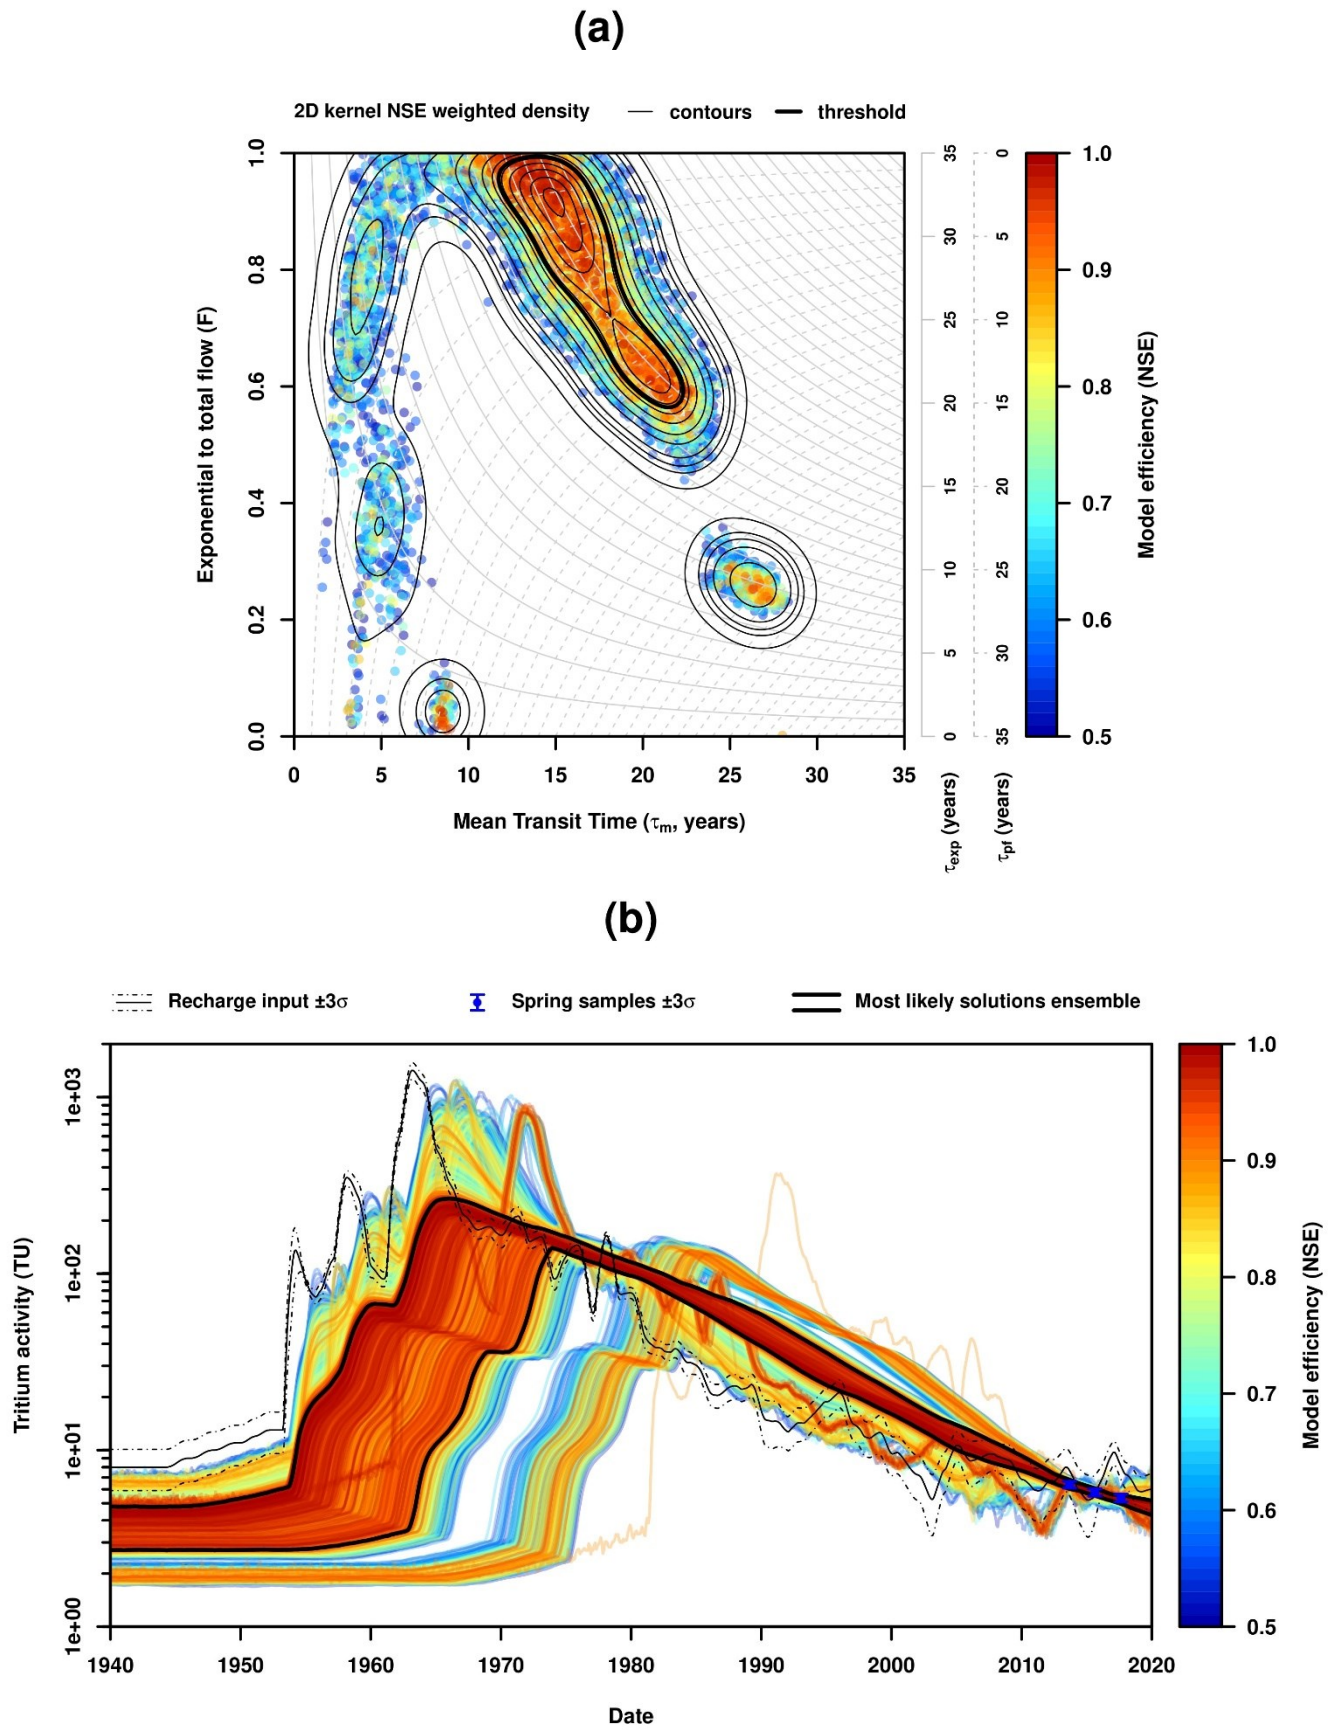

Figure S7: Modelling results of spring B10 in the EPM parameter space (a) and associated modelled tritium time-series (b).

(a)

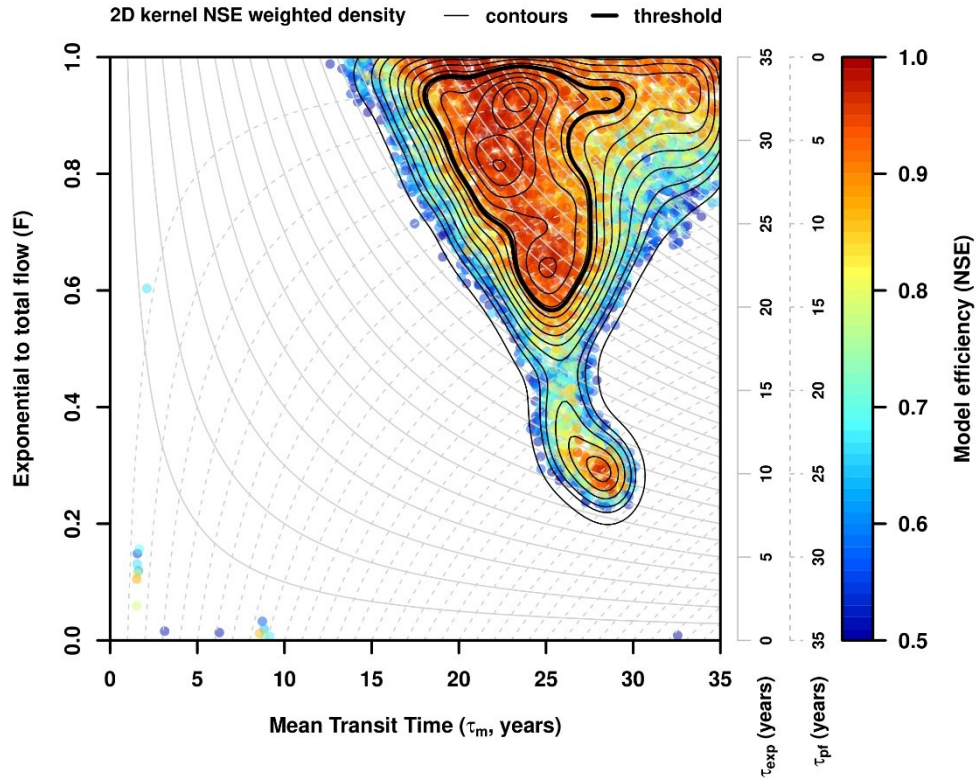

(b)

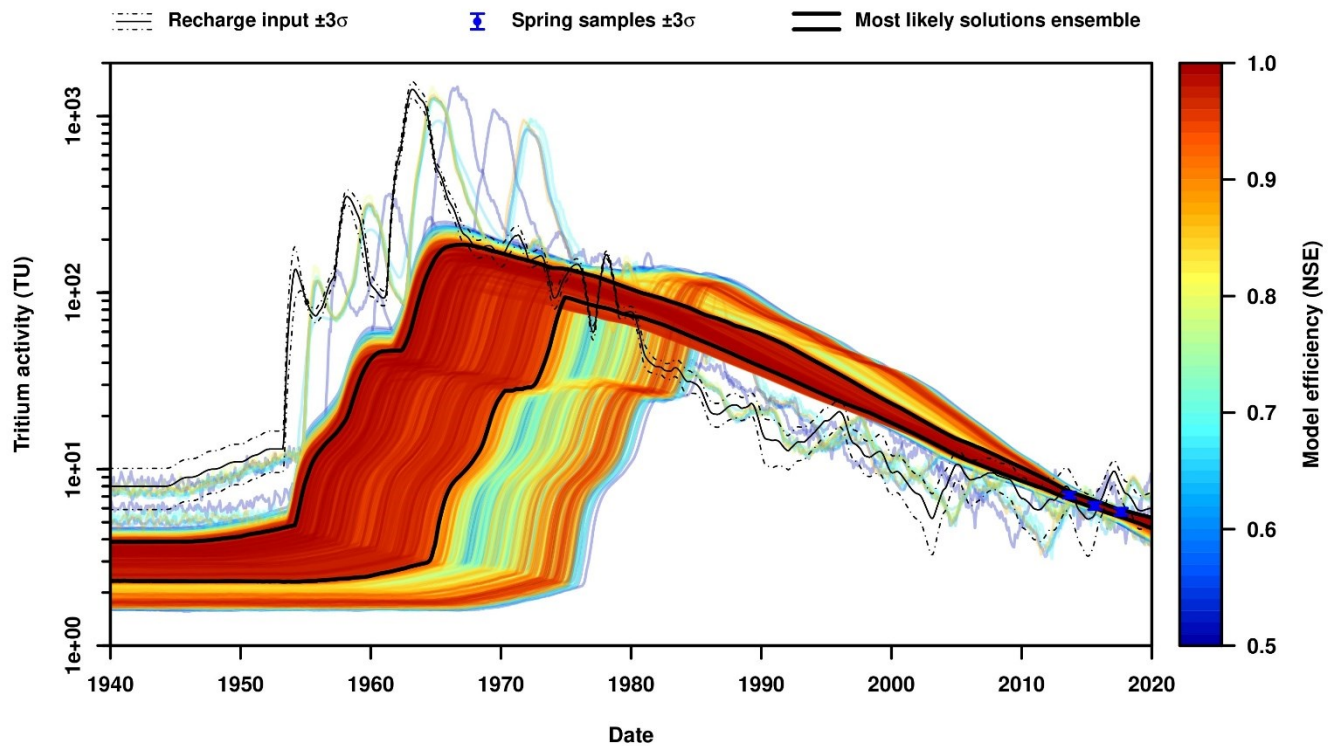

Figure S8: Modelling results of spring C01 in the EPM parameter space (a) and associated modelled tritium time-series (b).



(a)

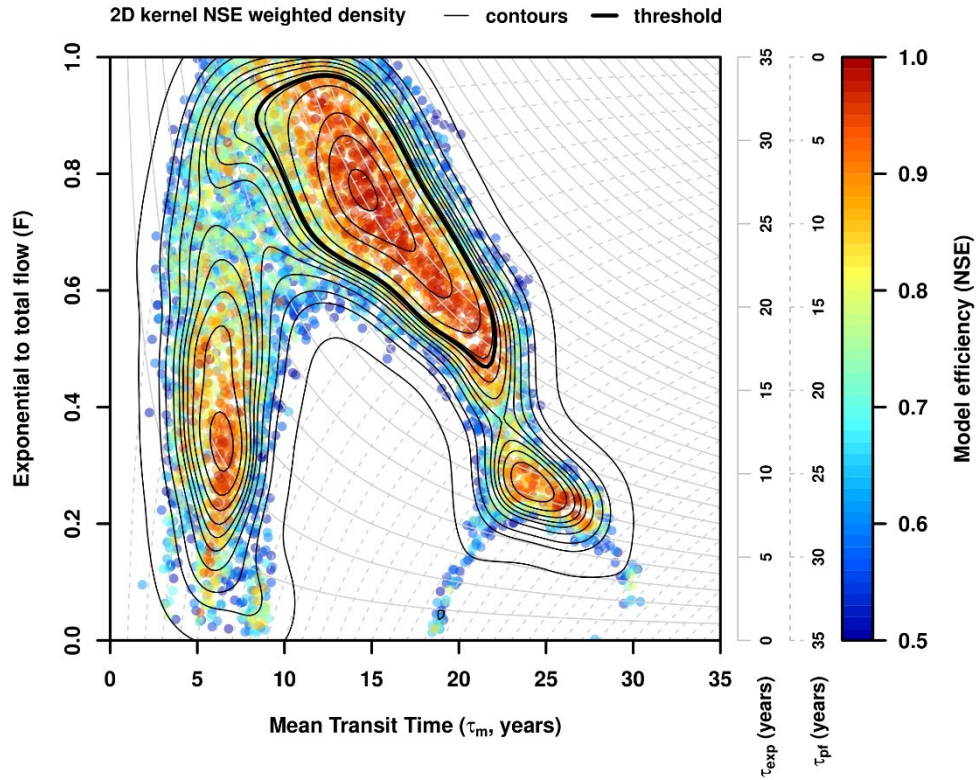

(b)

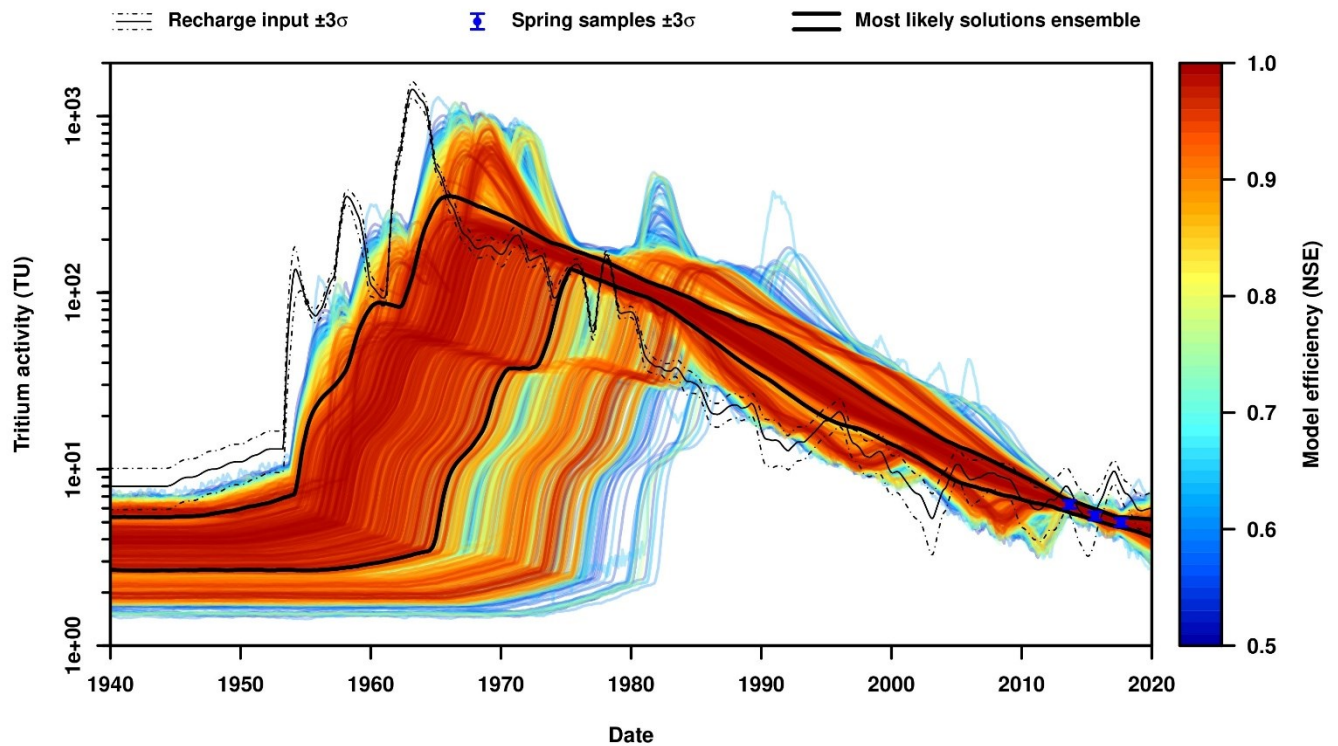

Figure S9: Modelling results of spring C03 in the EPM parameter space (a) and associated modelled tritium time-series (b).

(a)

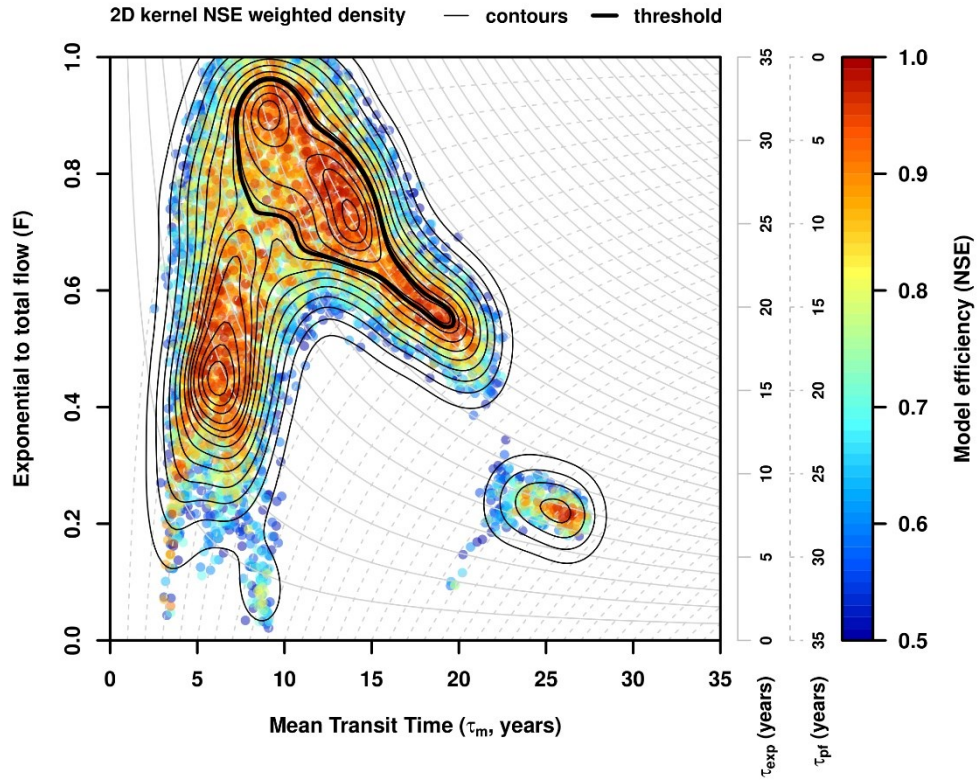

(b)

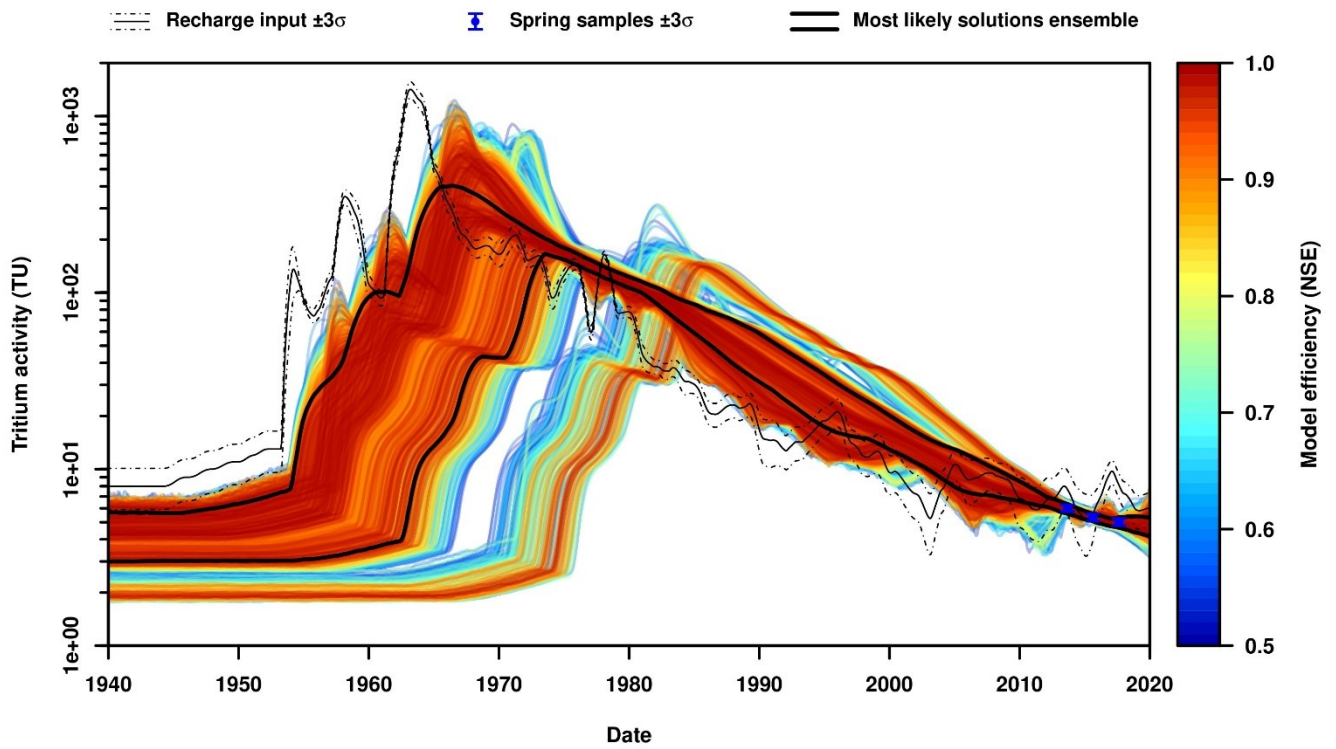

Figure S10: Modelling results of spring C04 in the EPM parameter space (a) and associated modelled tritium time-series (b).

(a)

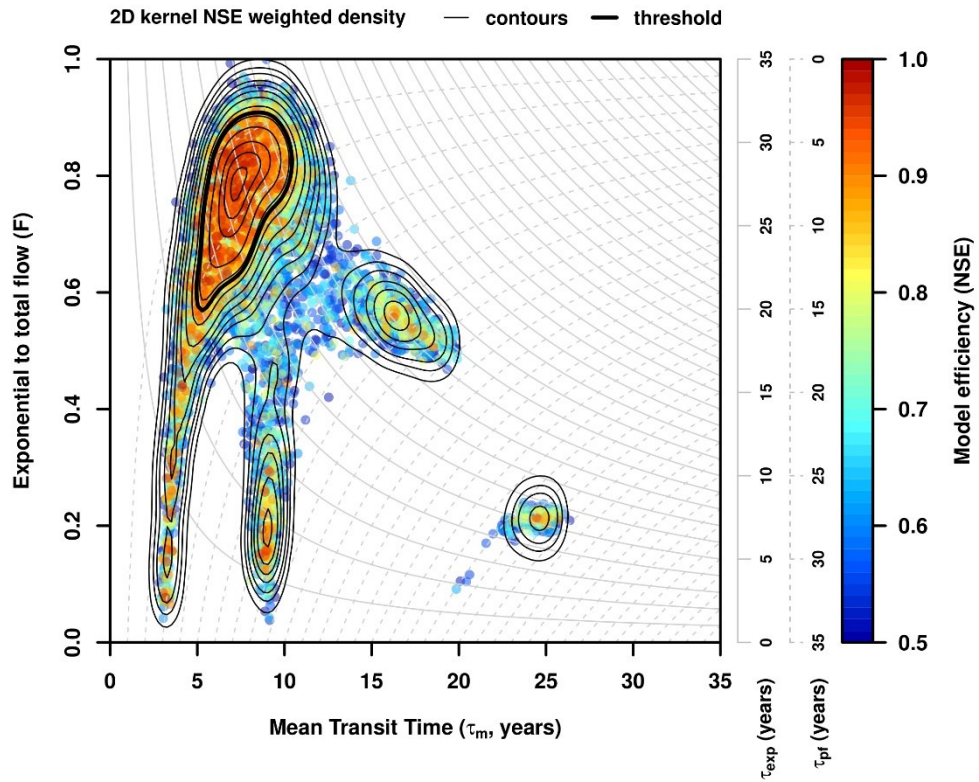

(b)

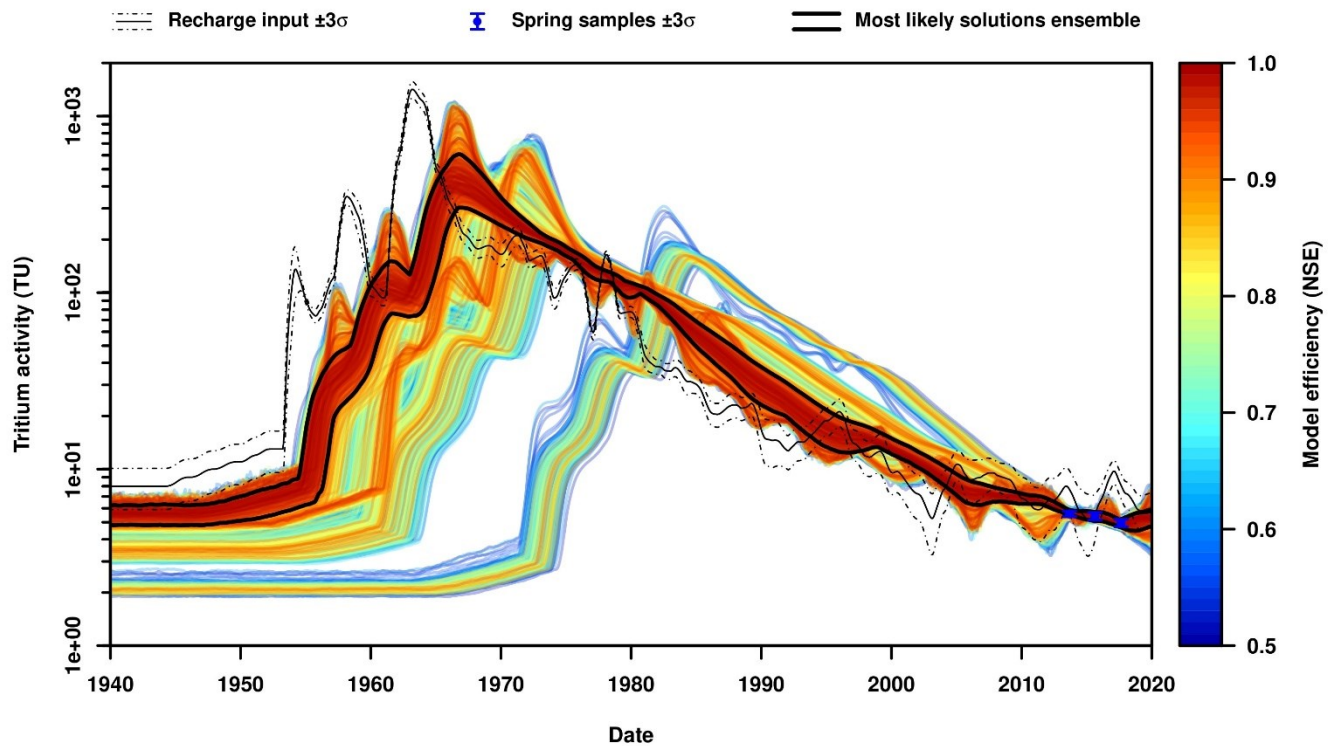

Figure S11: Modelling results of spring C05 in the EPM parameter space (a) and associated modelled tritium time-series (b).



(a)

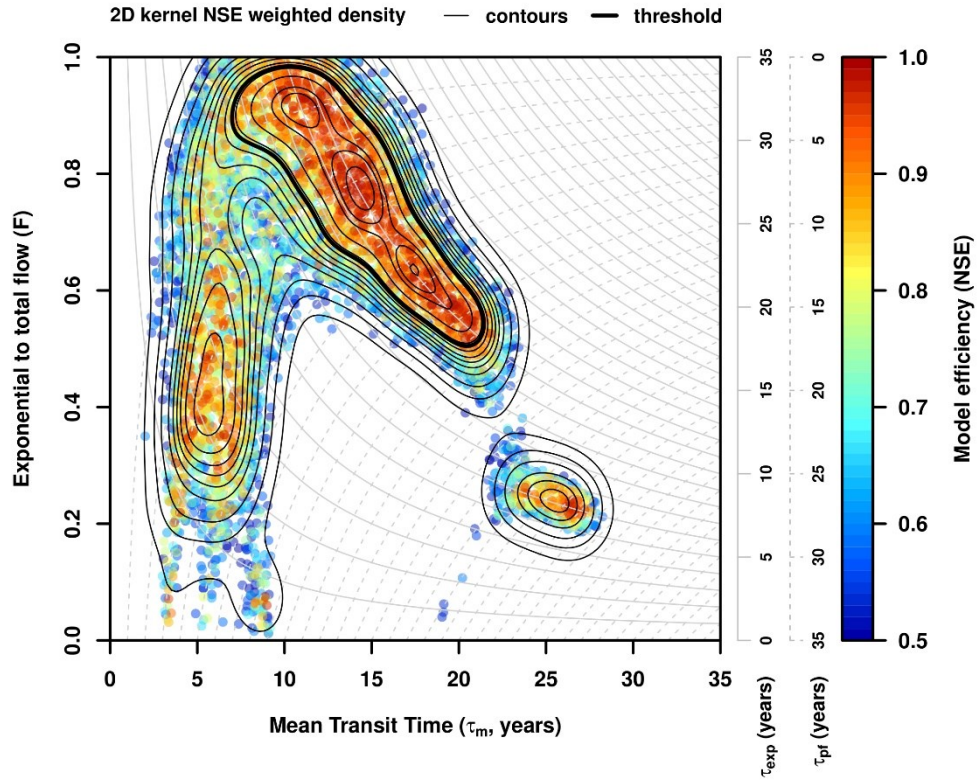

(b)

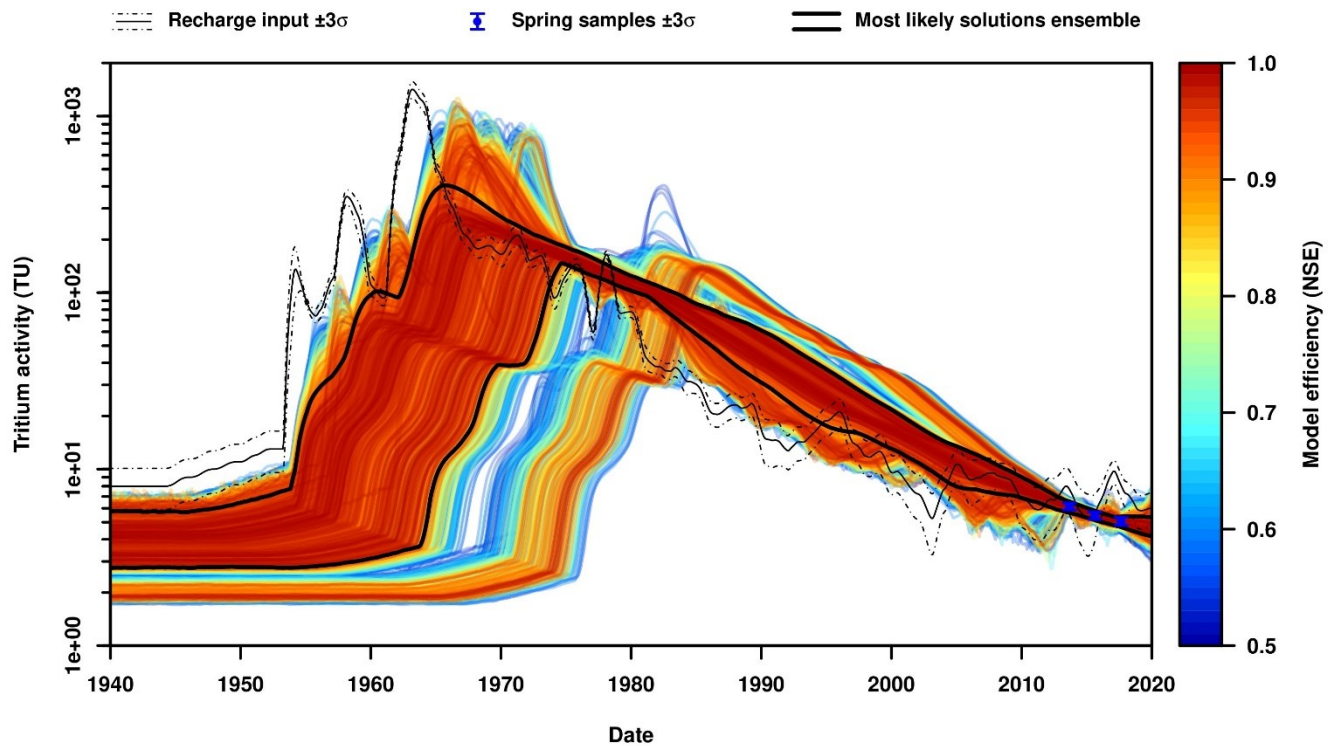

Figure S12: Modelling results of spring C07 in the EPM parameter space (a) and associated modelled tritium time-series (b).

(a)

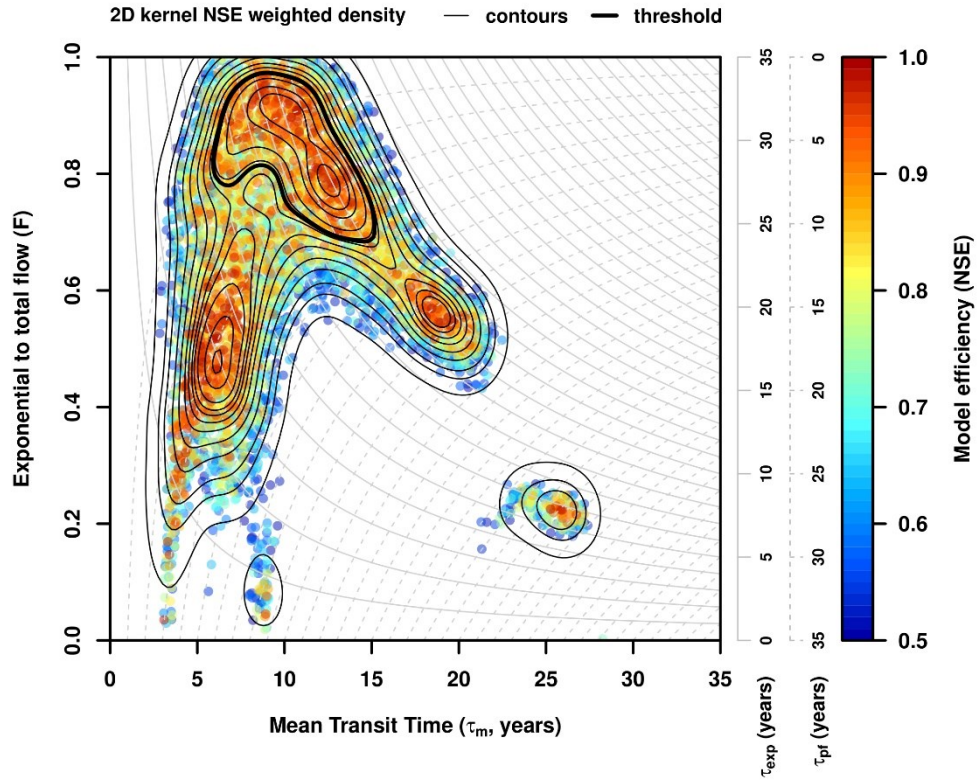

(b)

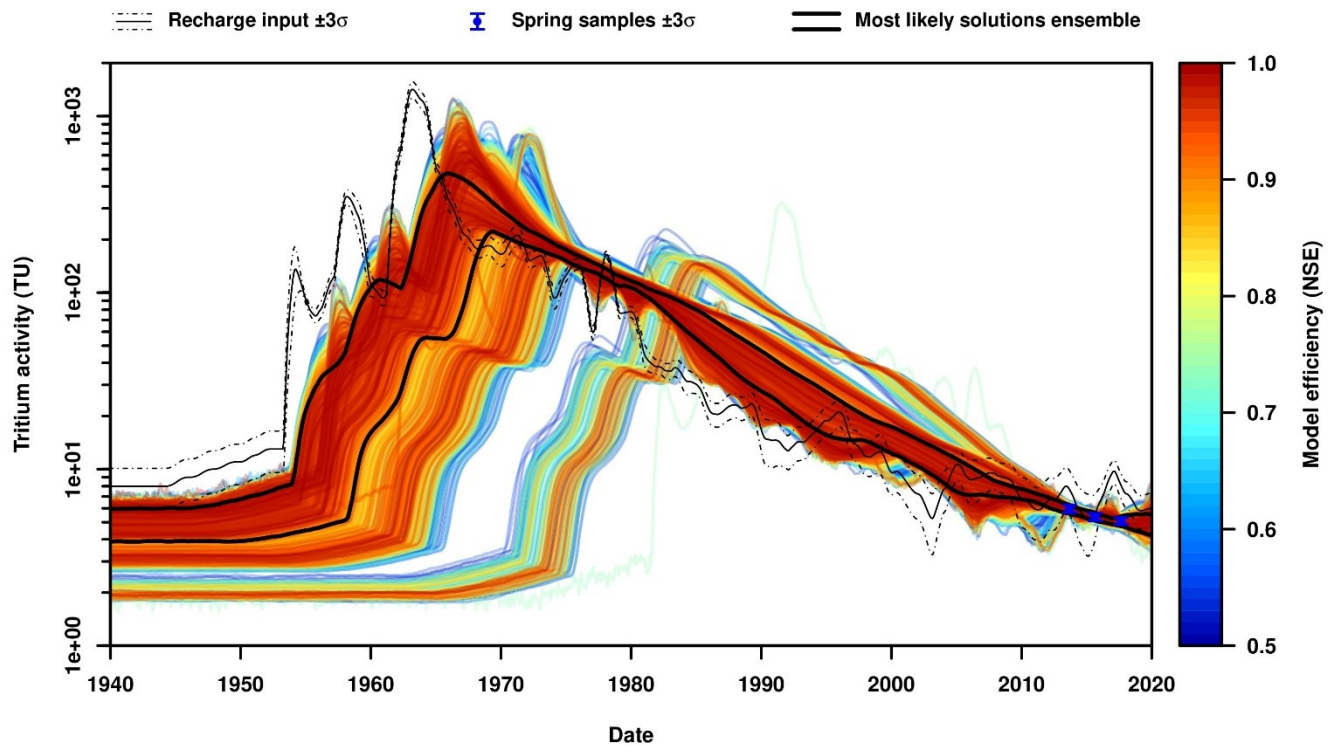

Figure S13: Modelling results of spring C09 in the EPM parameter space (a) and associated modelled tritium time-series (b).

(a)

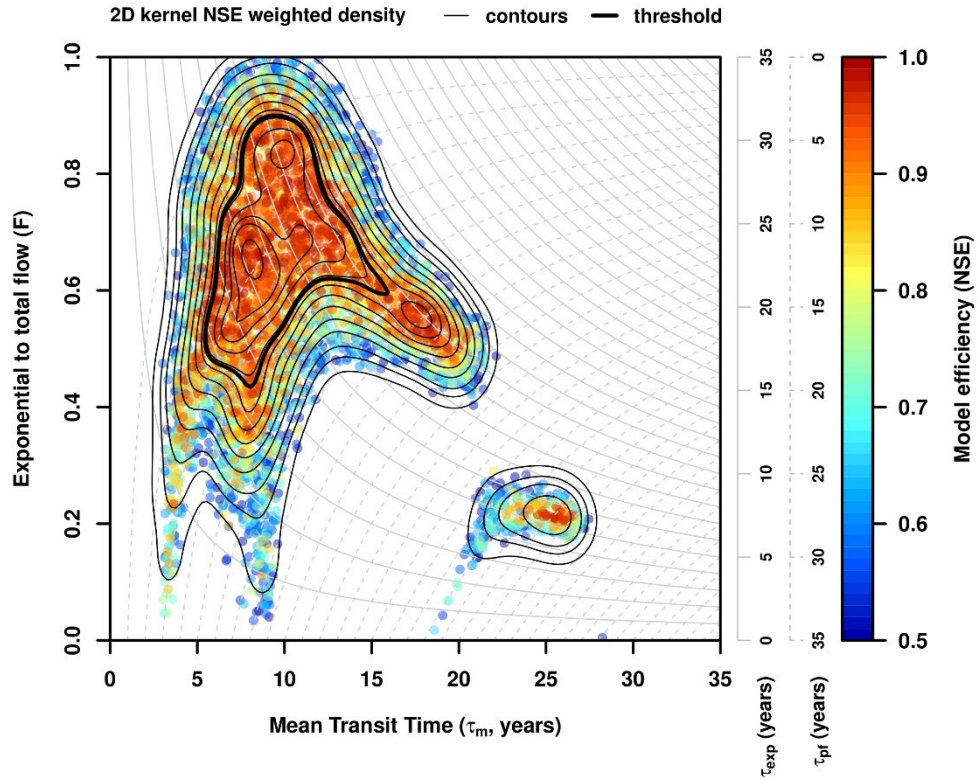

(b)

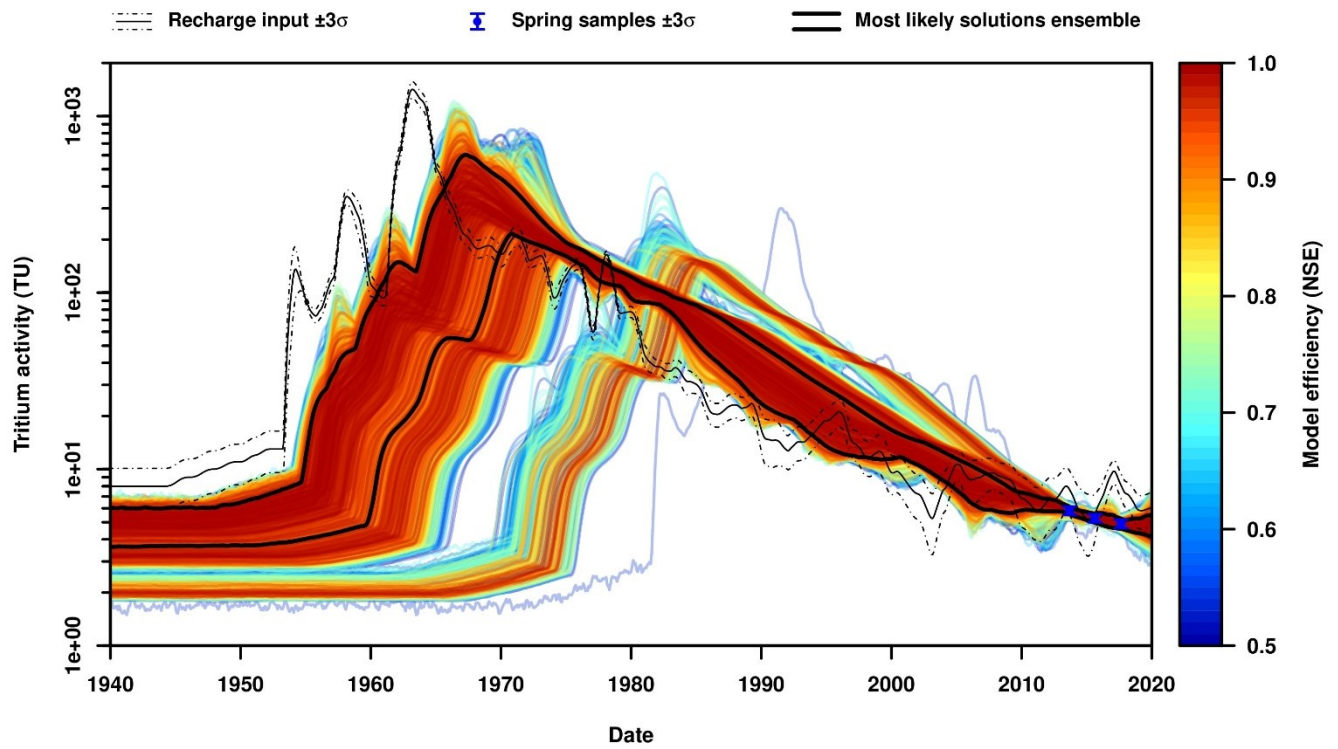

Figure S14: Modelling results of spring C10 in the EPM parameter space (a) and associated modelled tritium time-series (b).



(a)

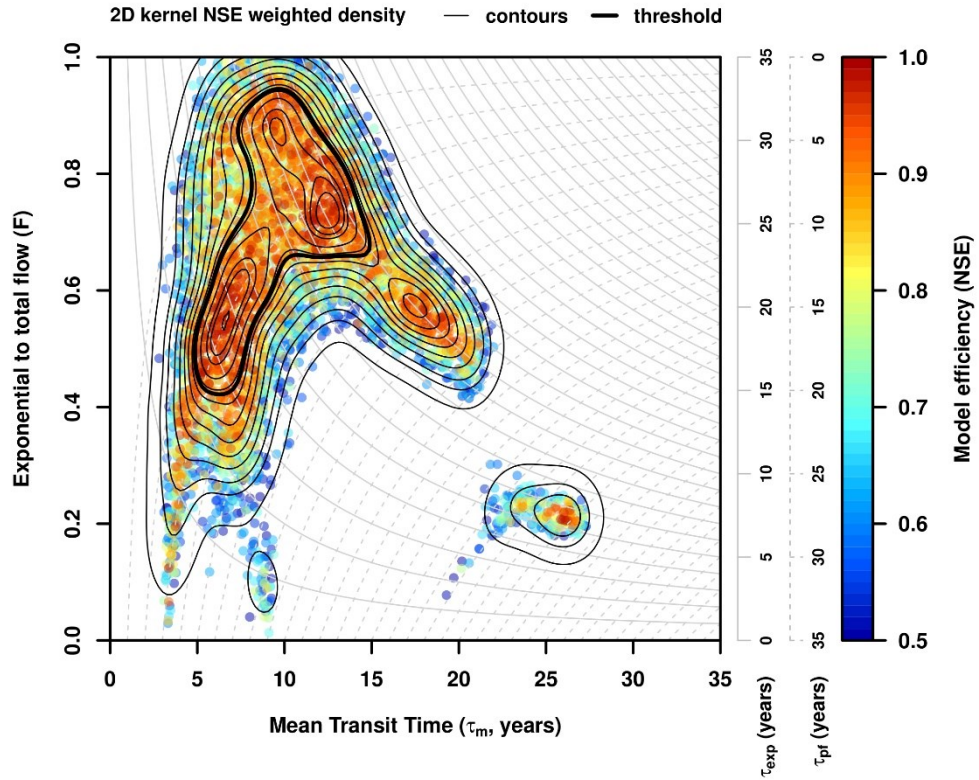

(b)

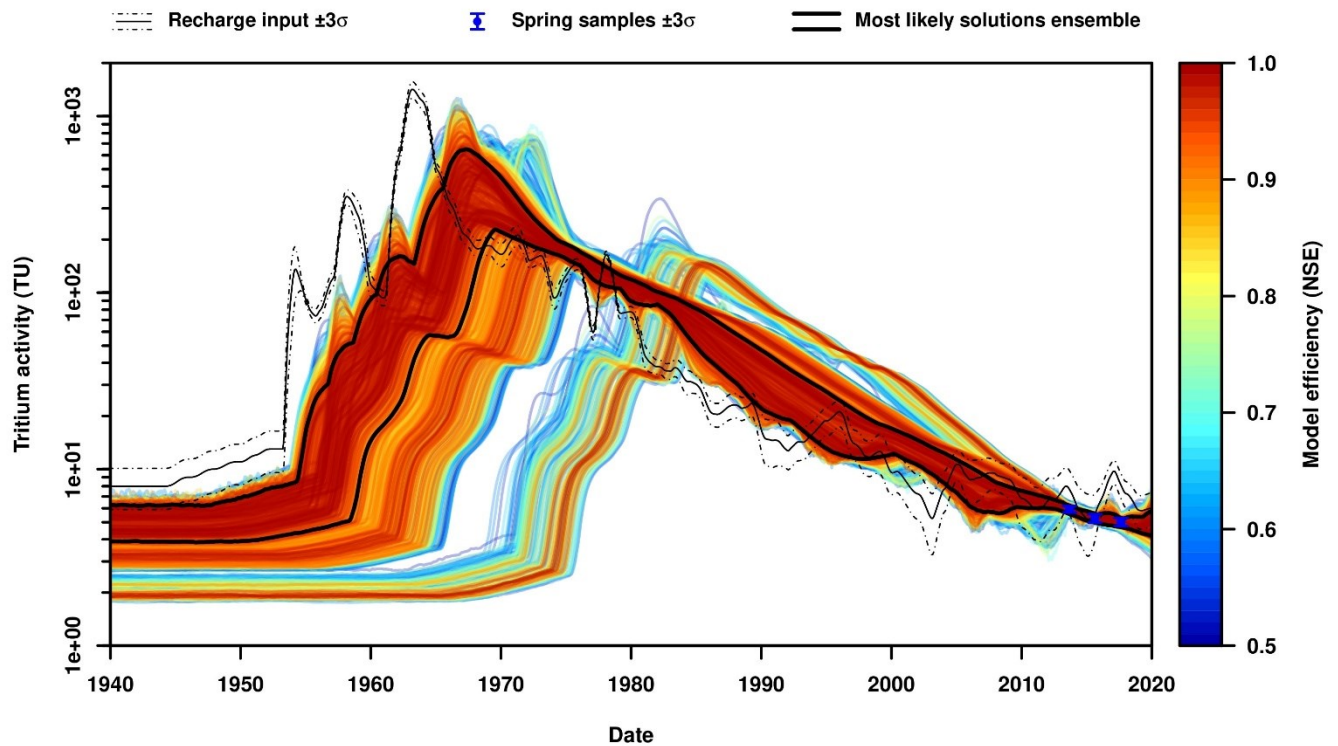

Figure S15: Modelling results of spring D01 in the EPM parameter space (a) and associated modelled tritium time-series (b).

(a)

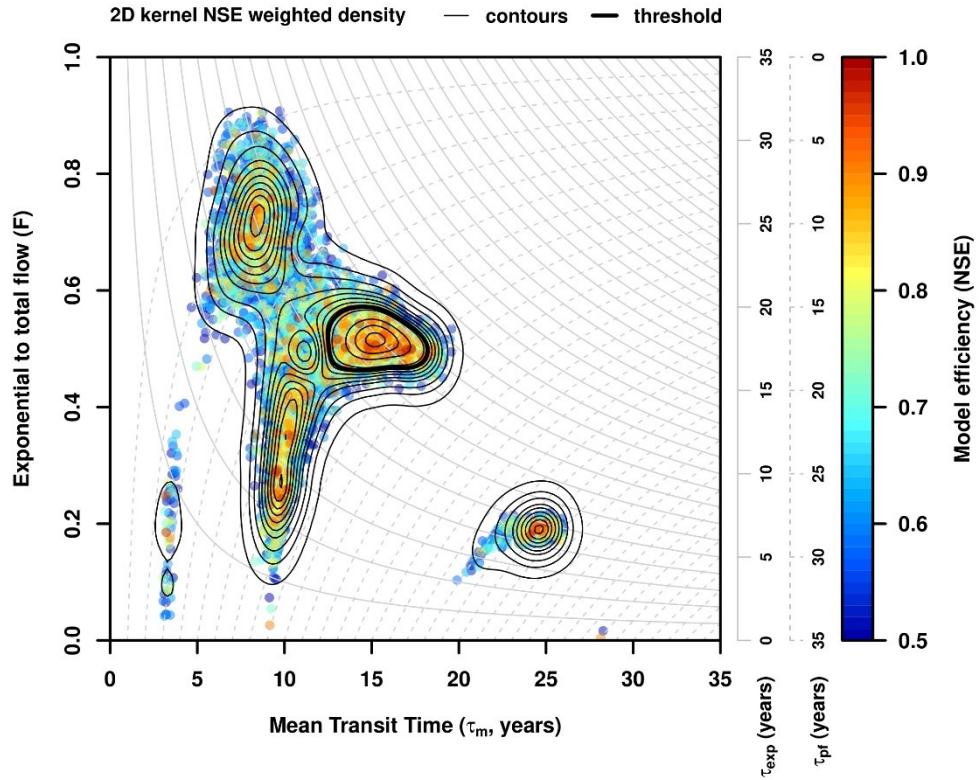

(b)

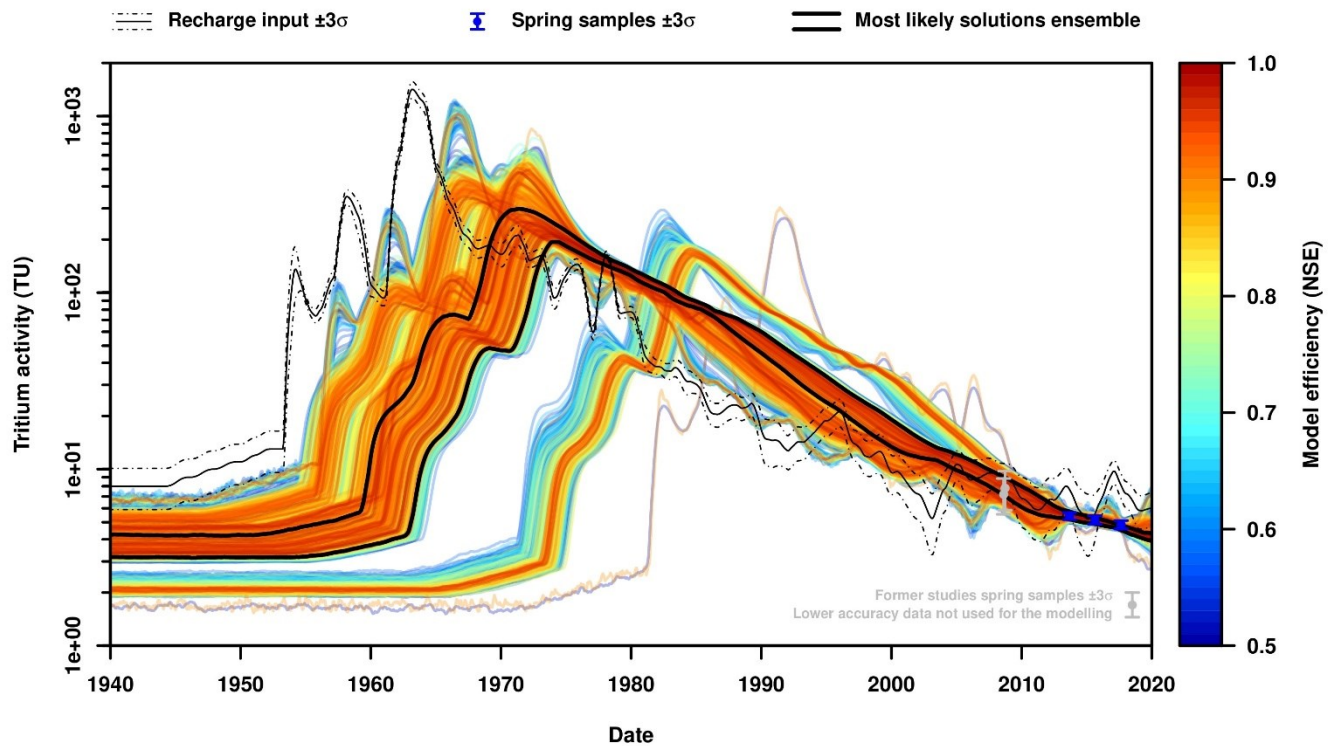

Figure S16: Modelling results of spring K01 in the EPM parameter space (a) and associated modelled tritium time-series (b).



(a)

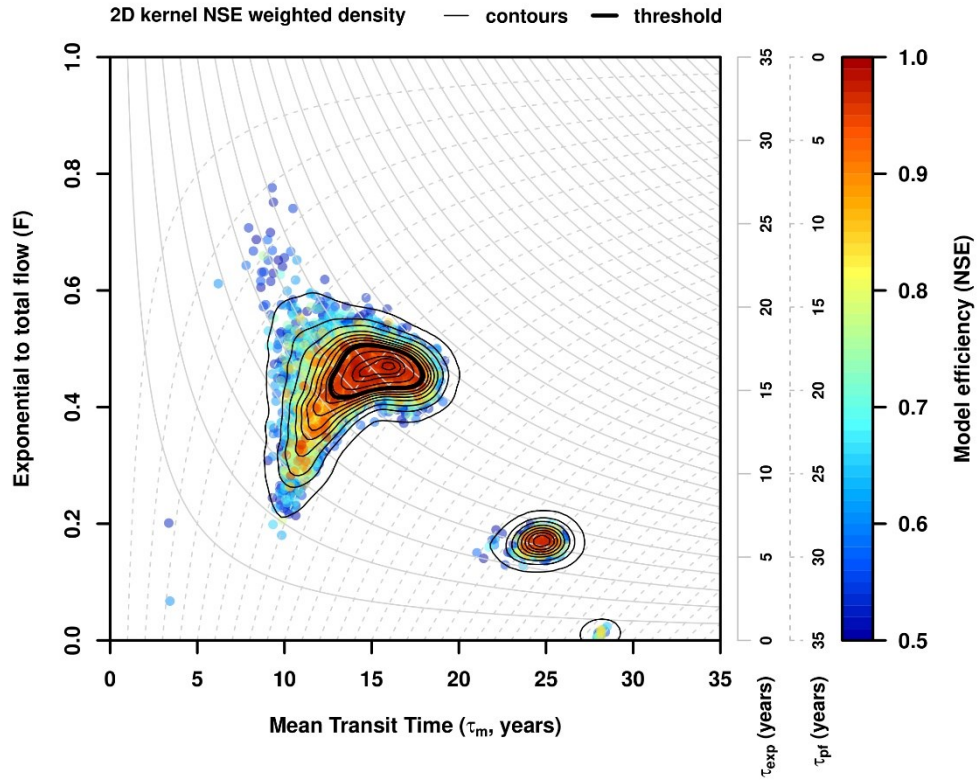

(b)

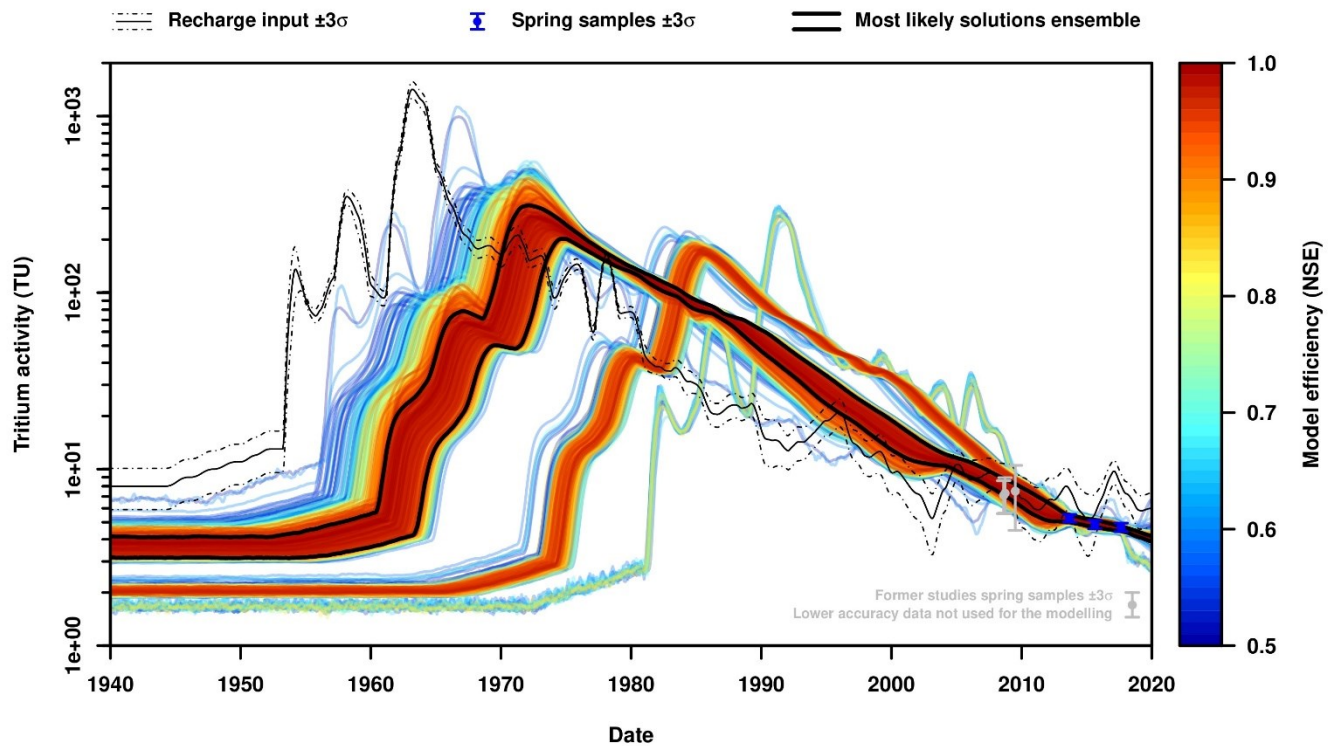

Figure S17: Modelling results of spring K02 in the EPM parameter space (a) and associated modelled tritium time-series (b).

(a)

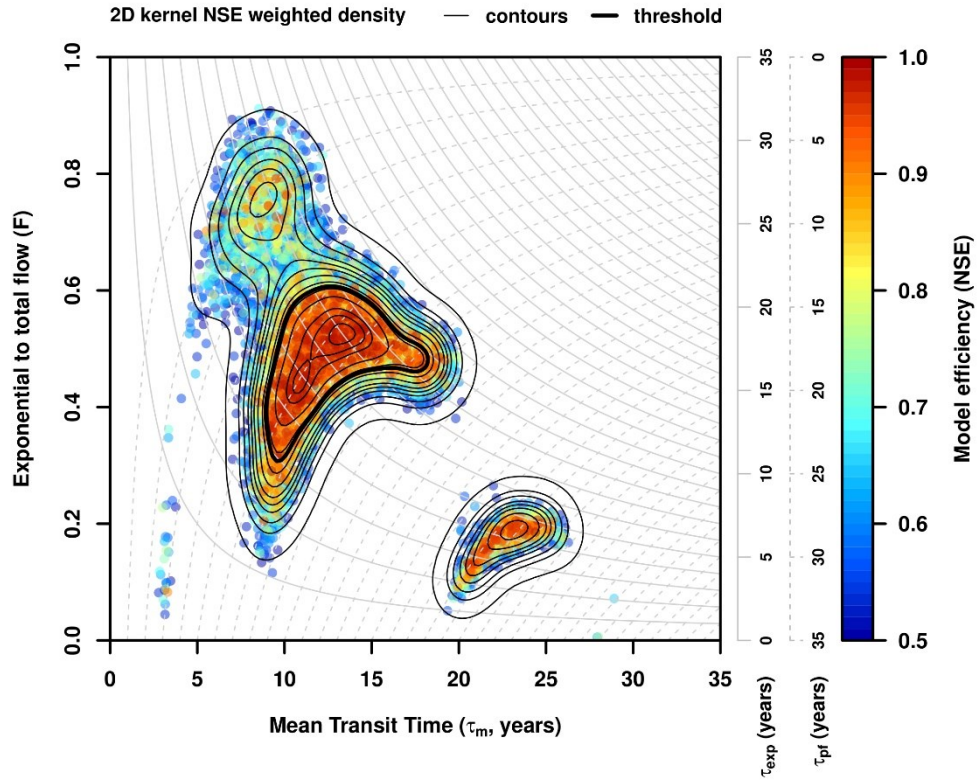

(b)

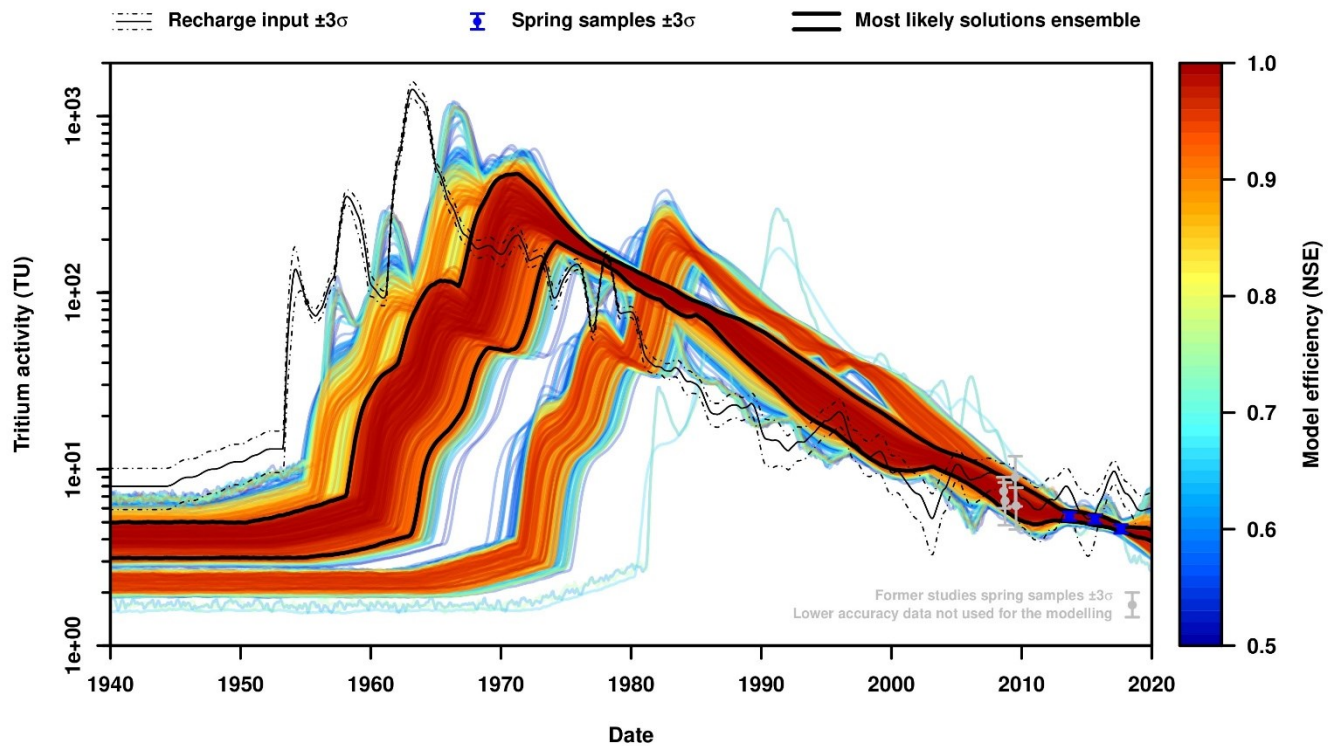

Figure S18: Modelling results of spring K03 in the EPM parameter space (a) and associated modelled tritium time-series (b).

(a)

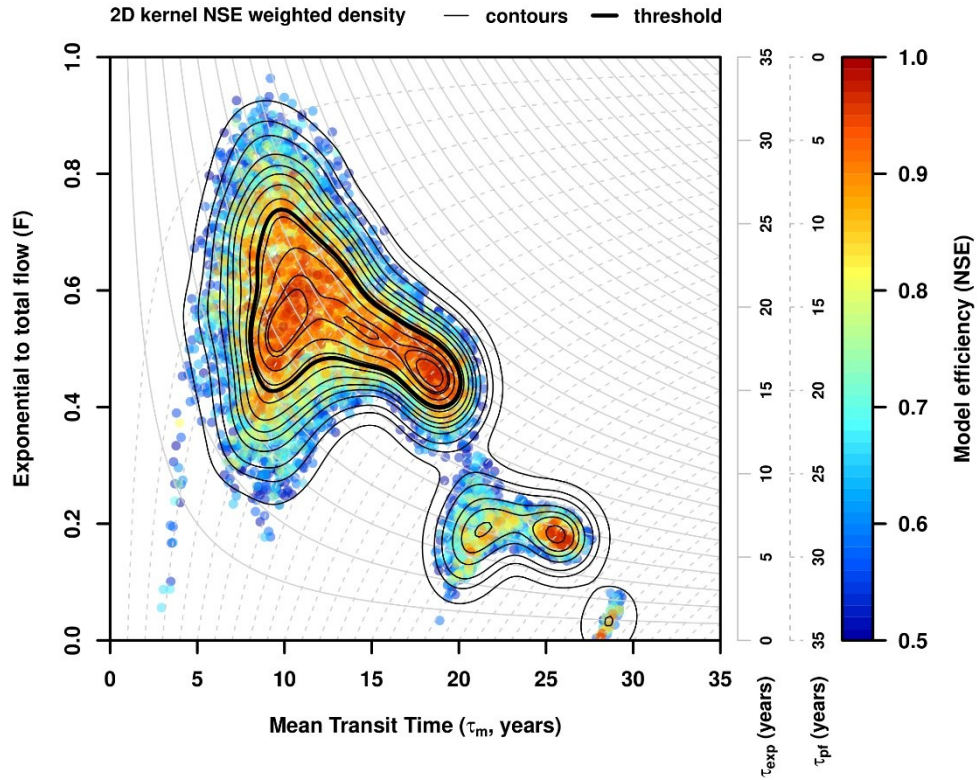

(b)

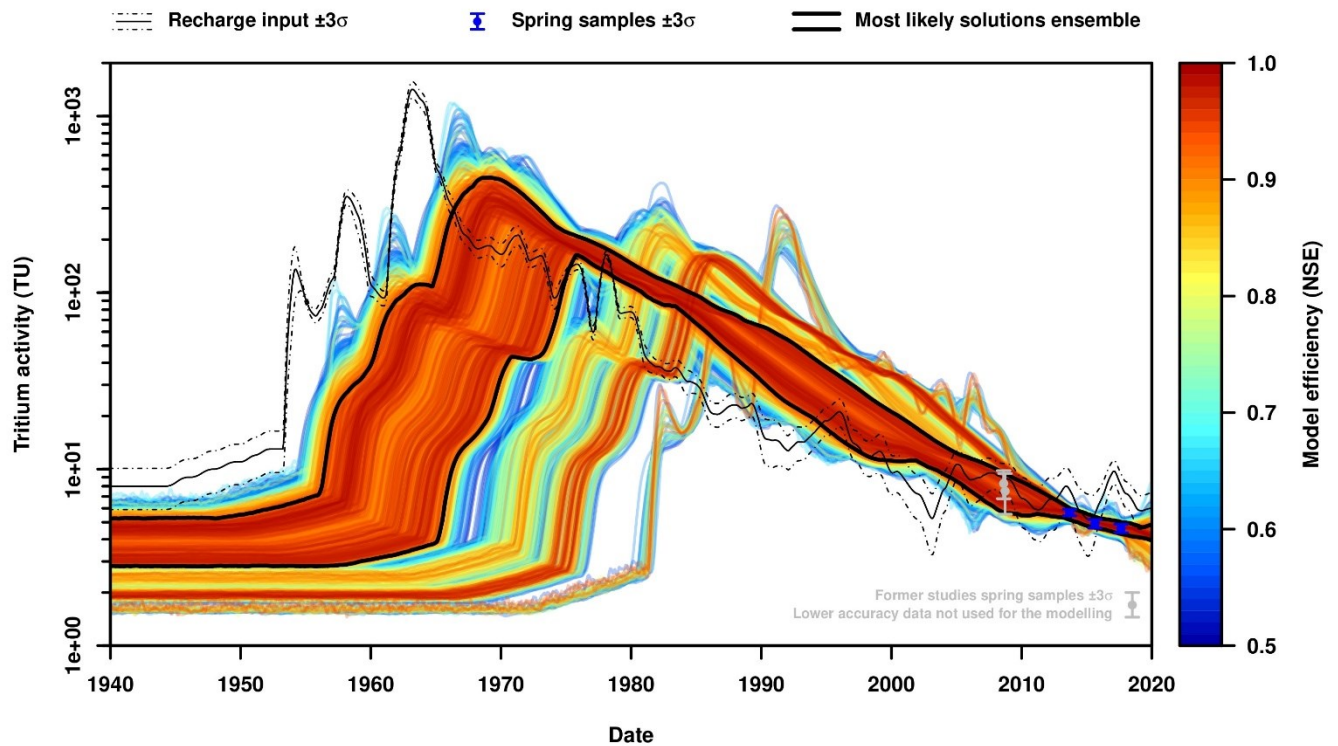

Figure S19: Modelling results of spring K07 in the EPM parameter space (a) and associated modelled tritium time-series (b).



(a)

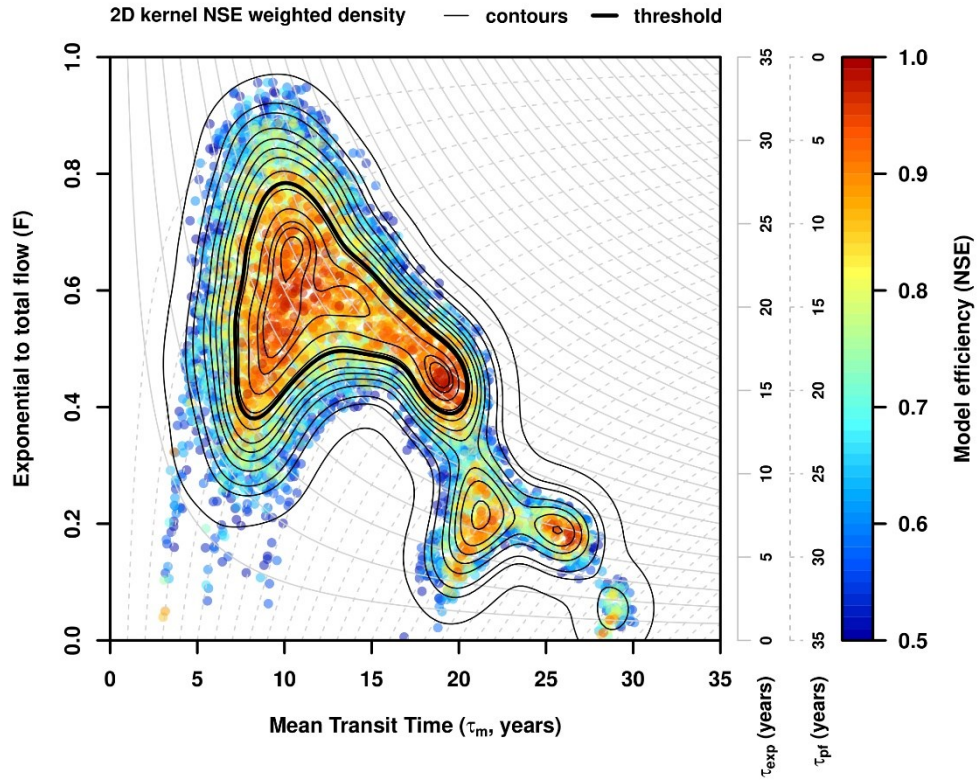

(b)

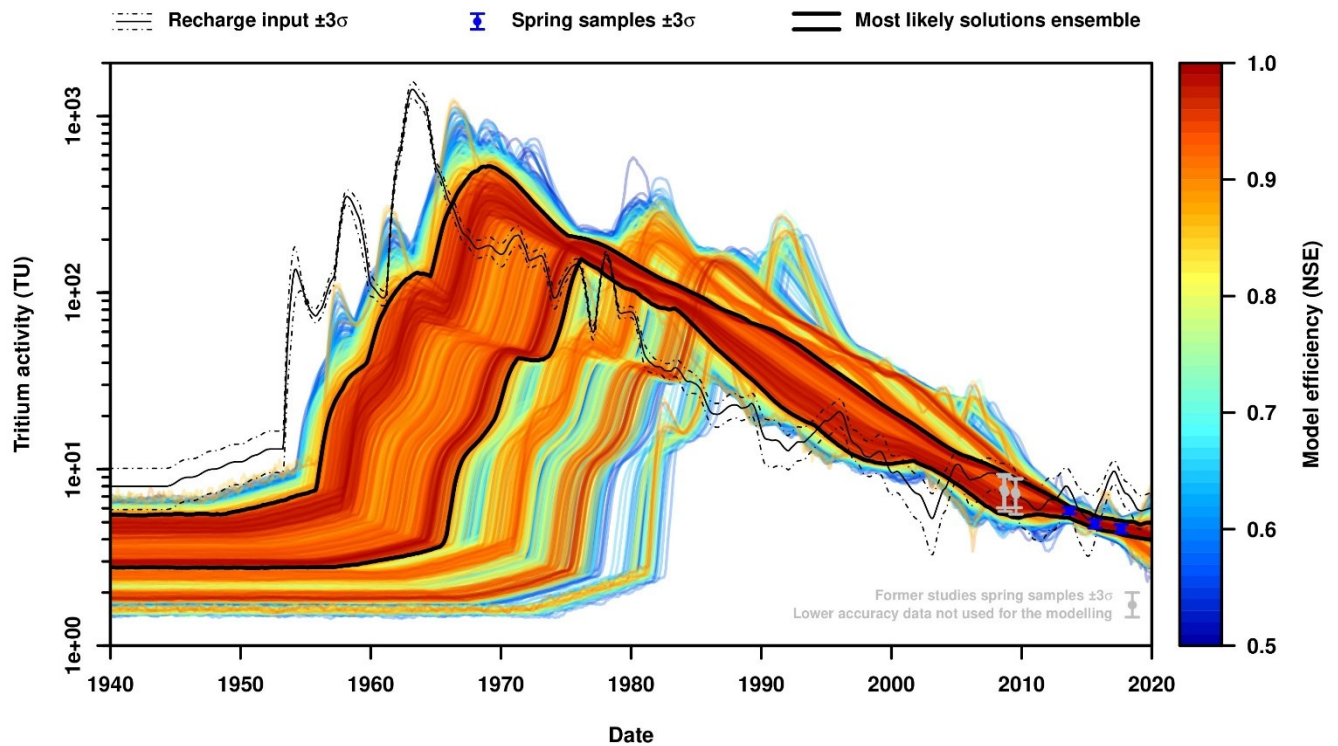

Figure S20: Modelling results of spring K13 in the EPM parameter space (a) and associated modelled tritium time-series (b).

(a)

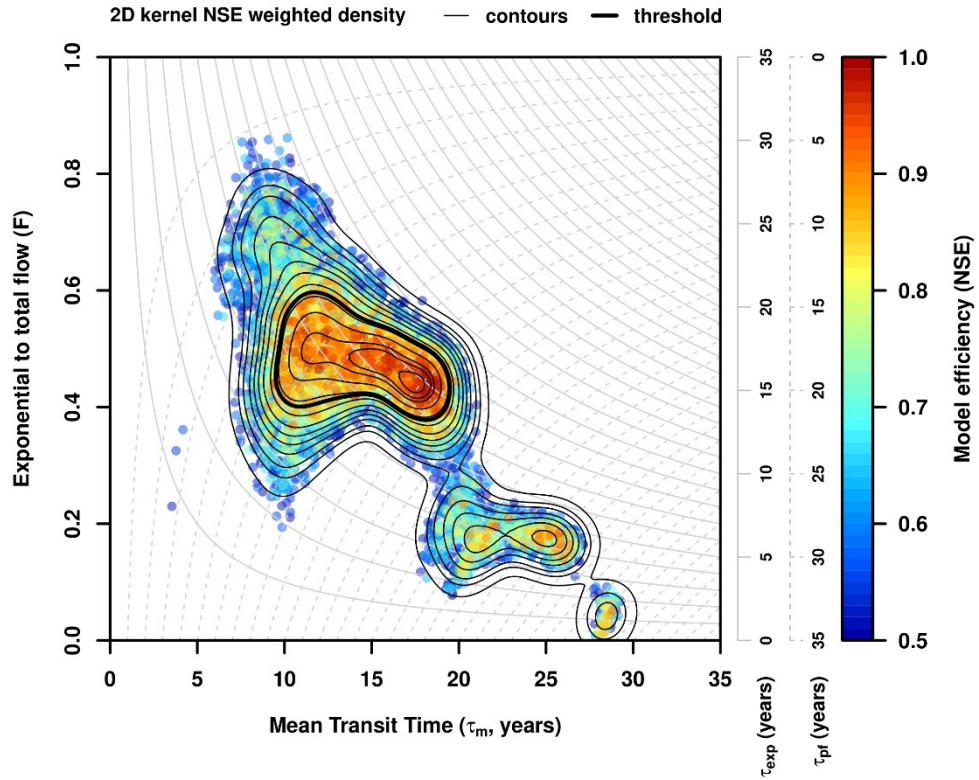

(b)

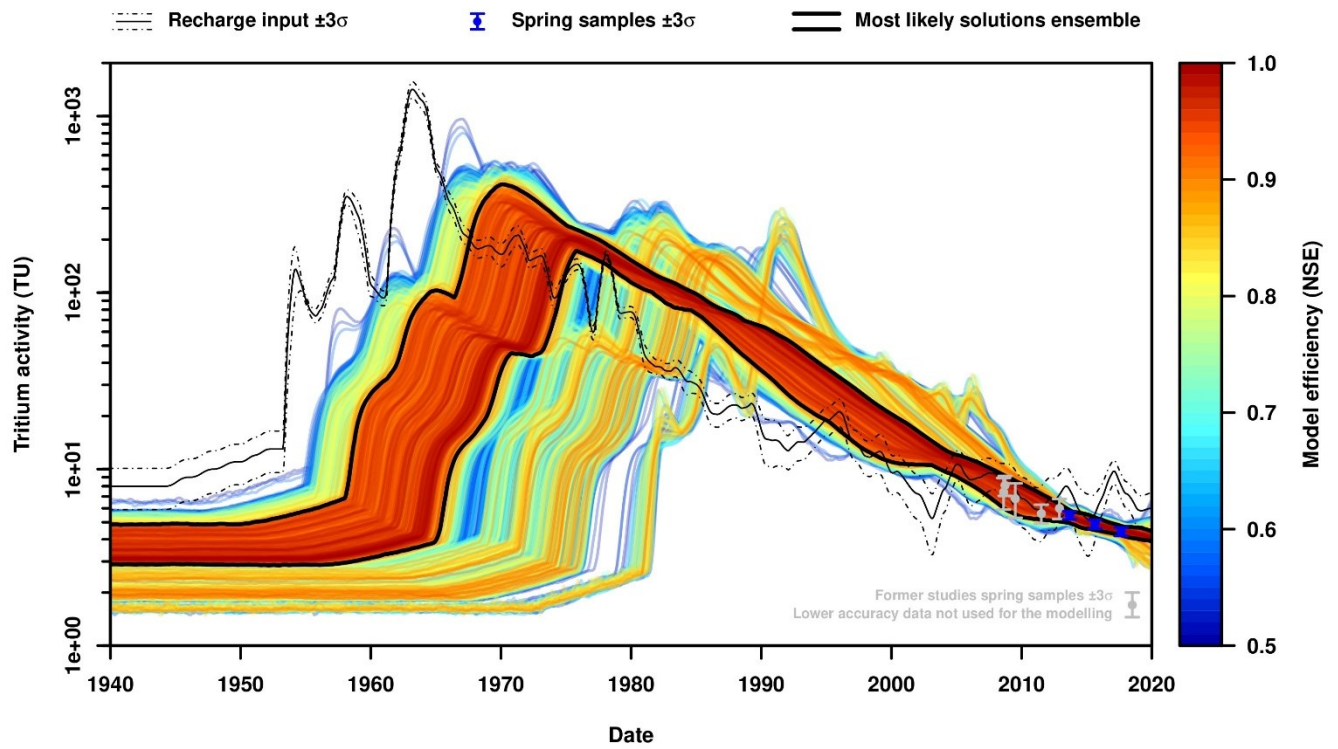

Figure S21: Modelling results of spring K17 in the EPM parameter space (a) and associated modelled tritium time-series (b).

(a)

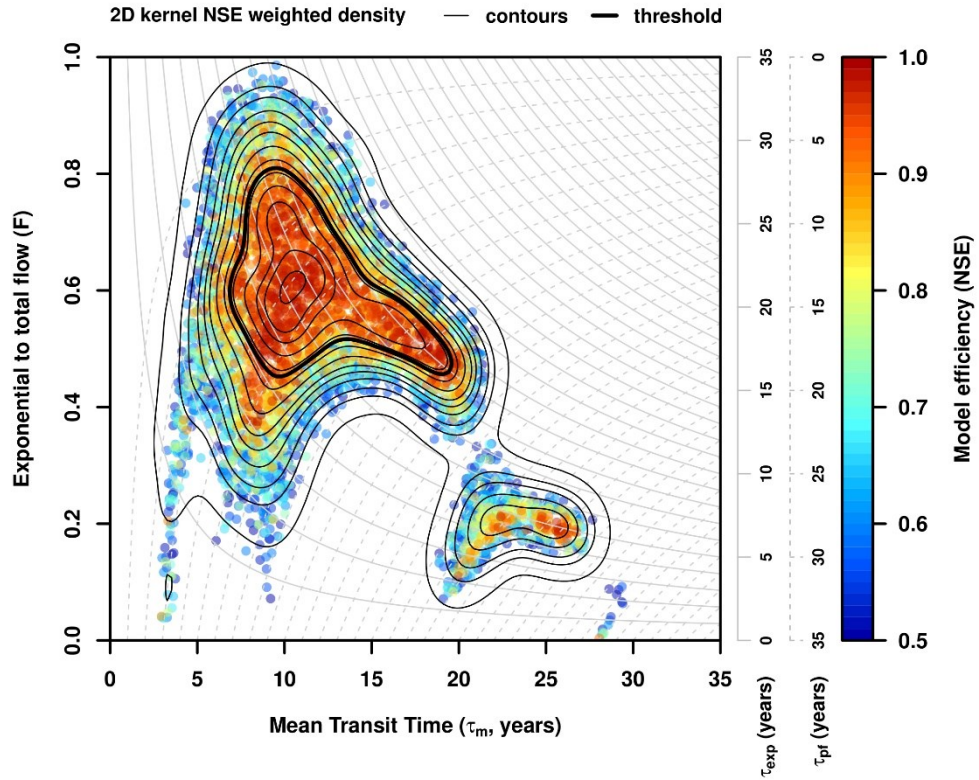

(b)

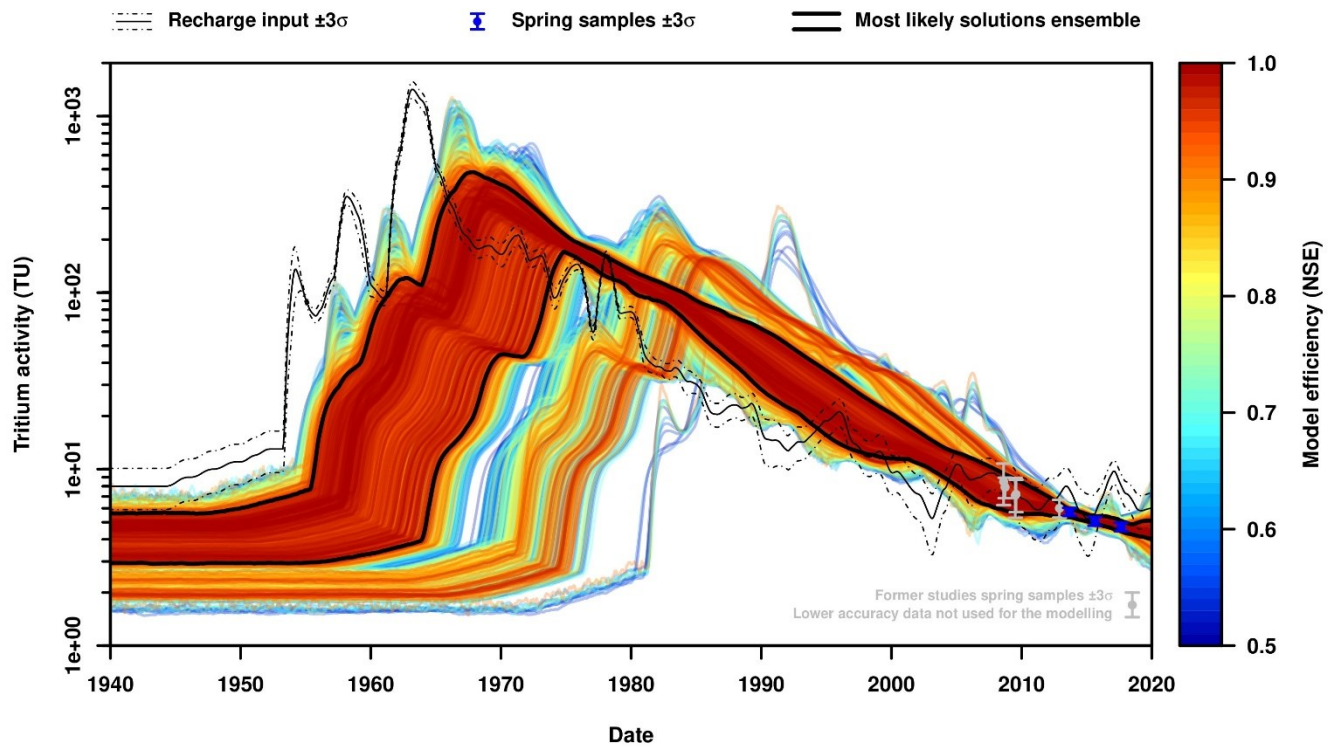

Figure S22: Modelling results of spring K19 in the EPM parameter space (a) and associated modelled tritium time-series (b).



(a)

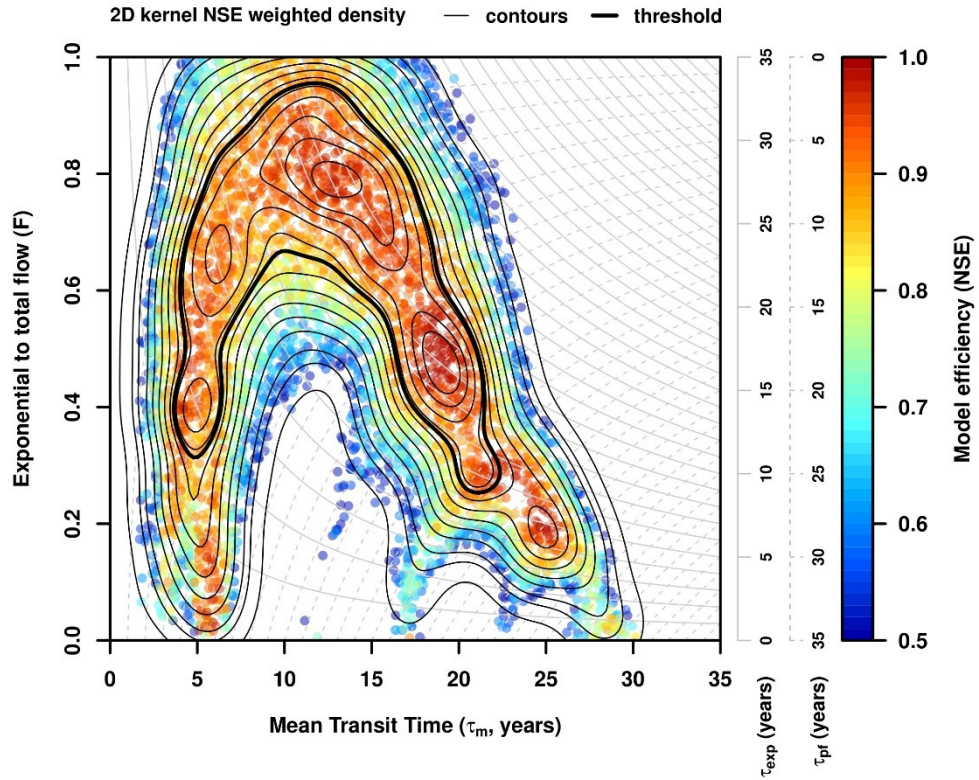

(b)

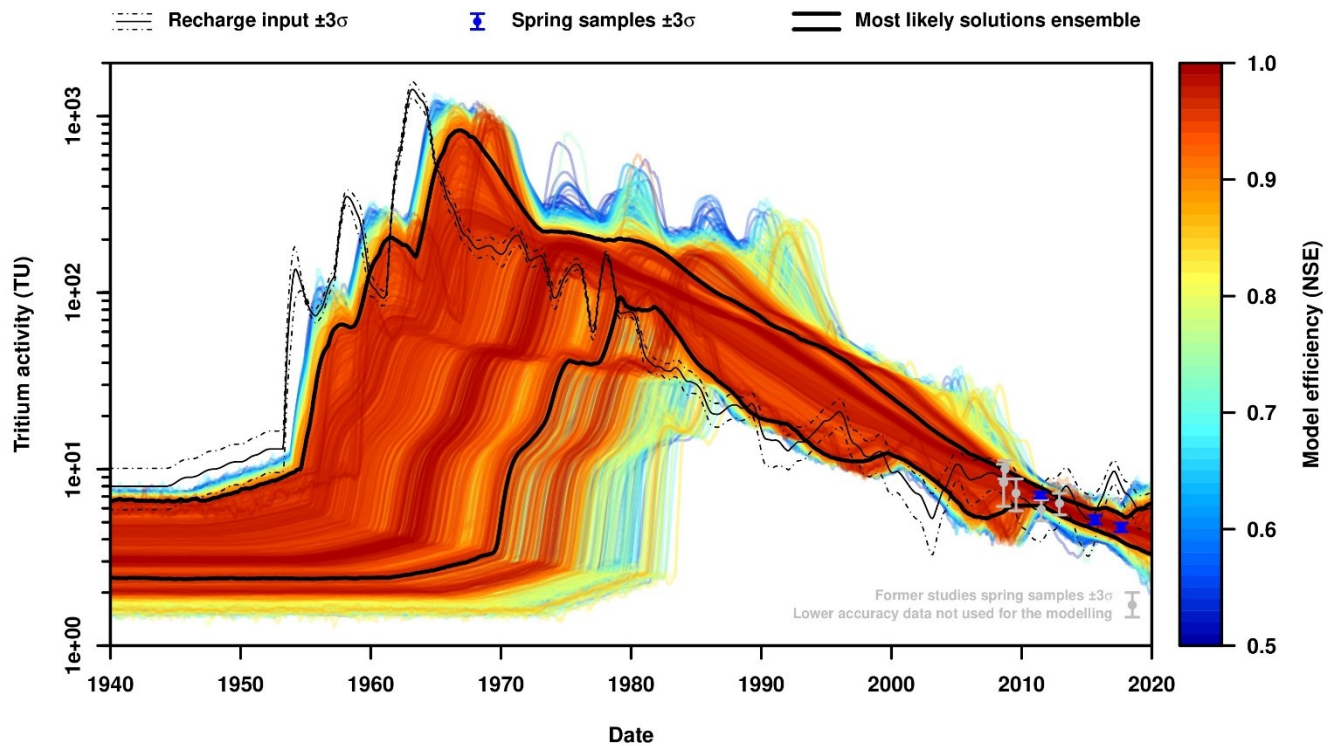

Figure S23: Modelling results of spring K21 in the EPM parameter space (a) and associated modelled tritium time-series (b).

(a)

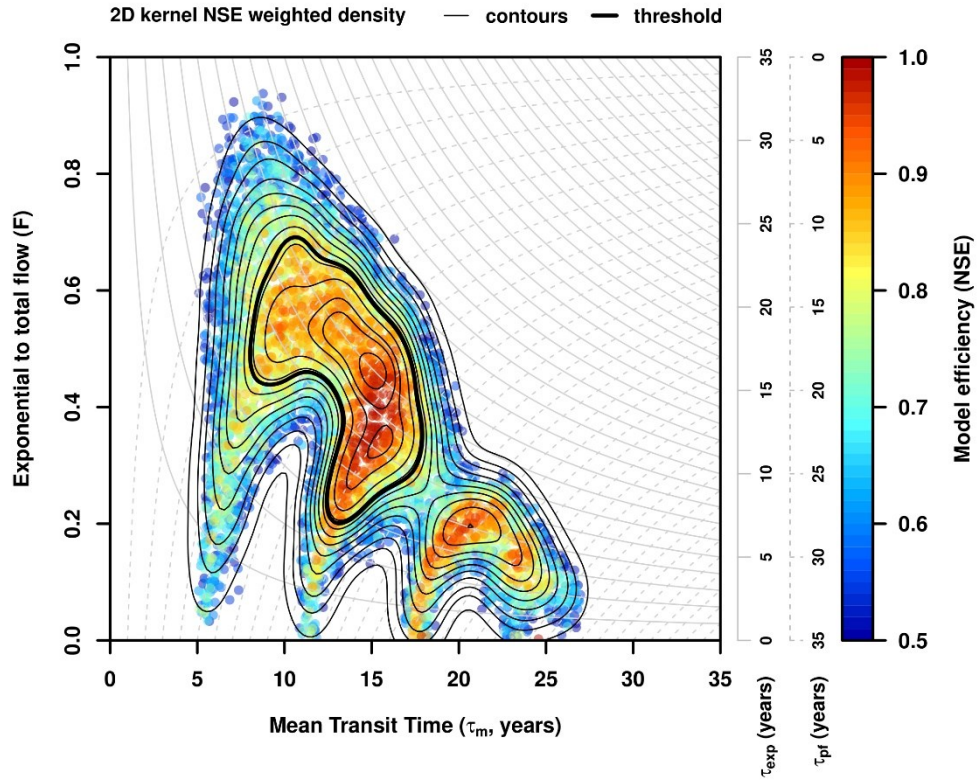

(b)

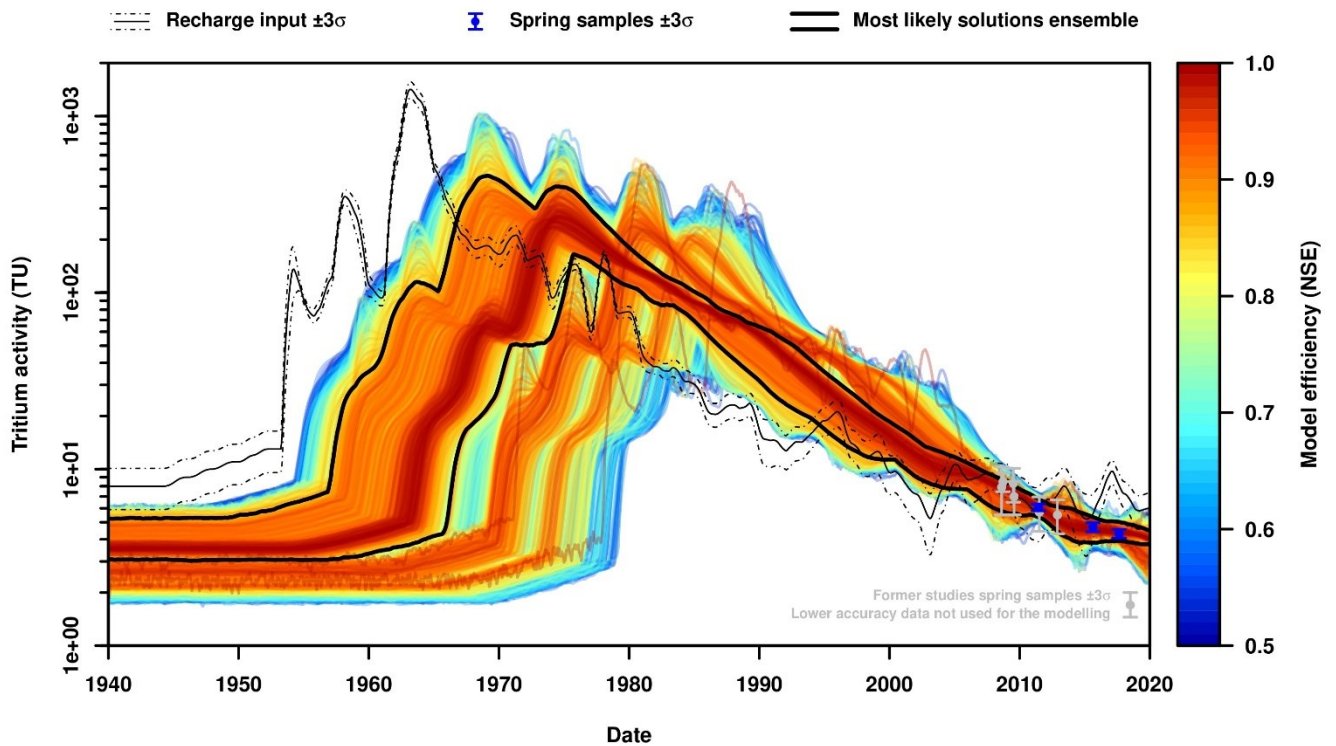

Figure S24: Modelling results of spring K21A in the EPM parameter space (a) and associated modelled tritium time-series (b).



(a)

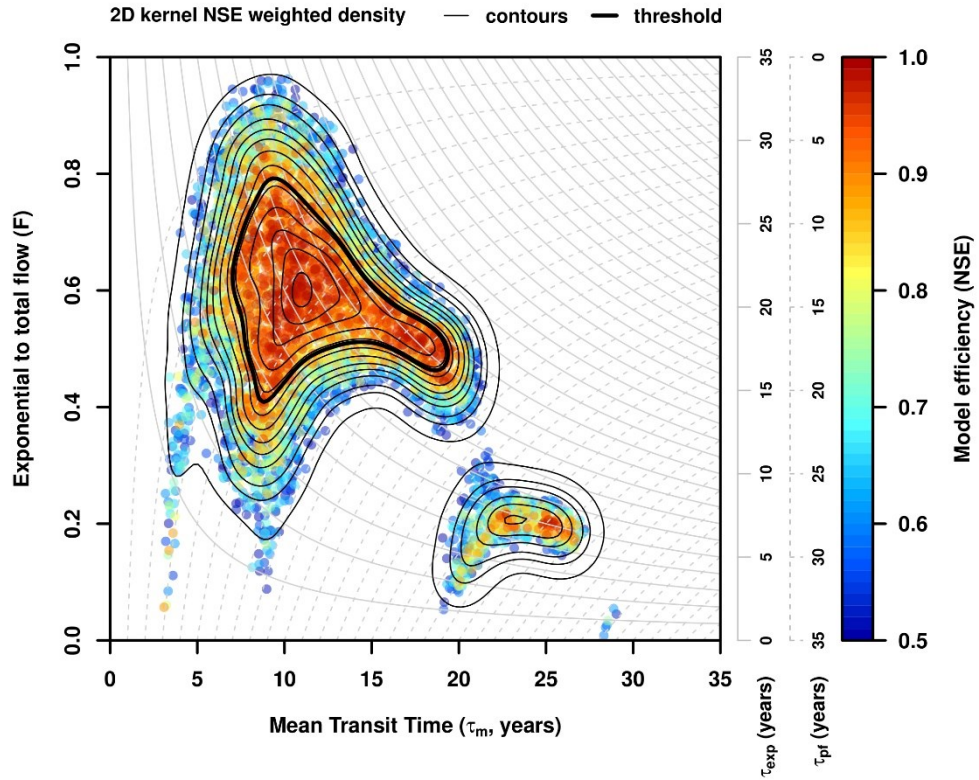

(b)

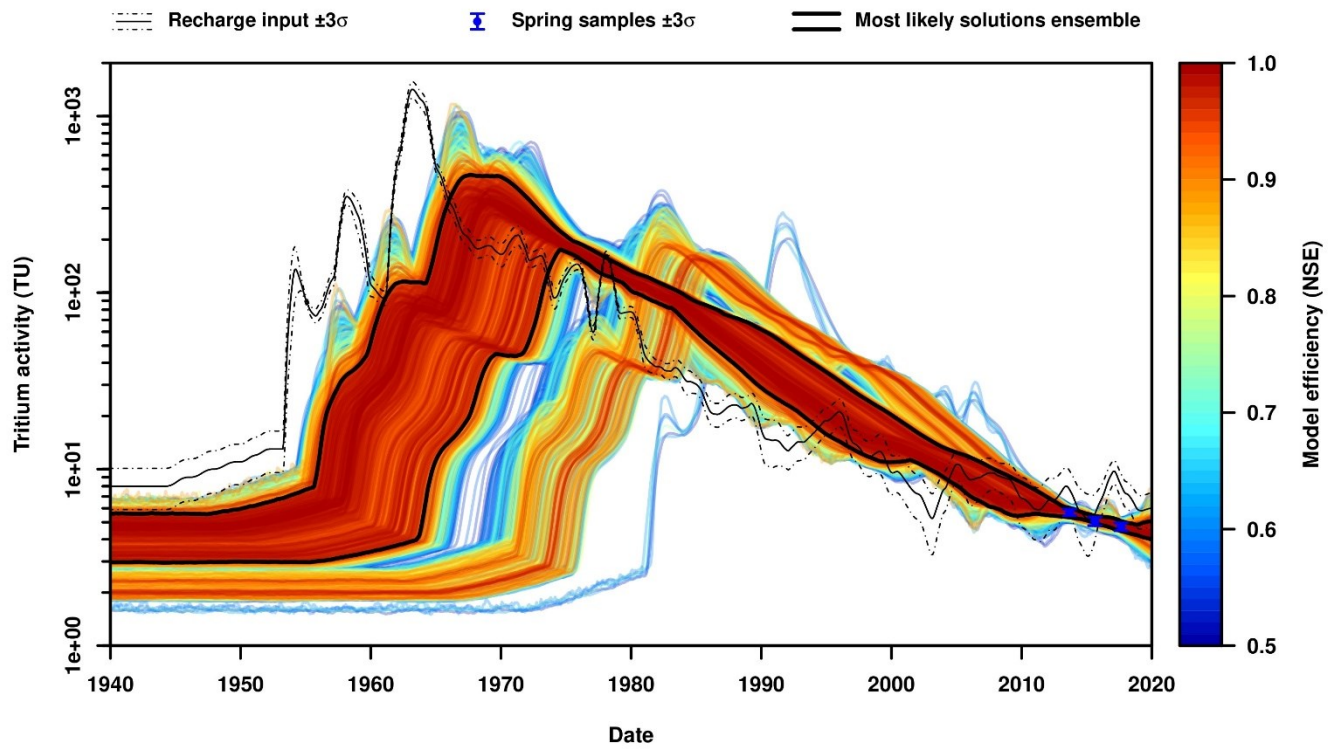

Figure S25: Modelling results of spring K22 in the EPM parameter space (a) and associated modelled tritium time-series (b).

(a)

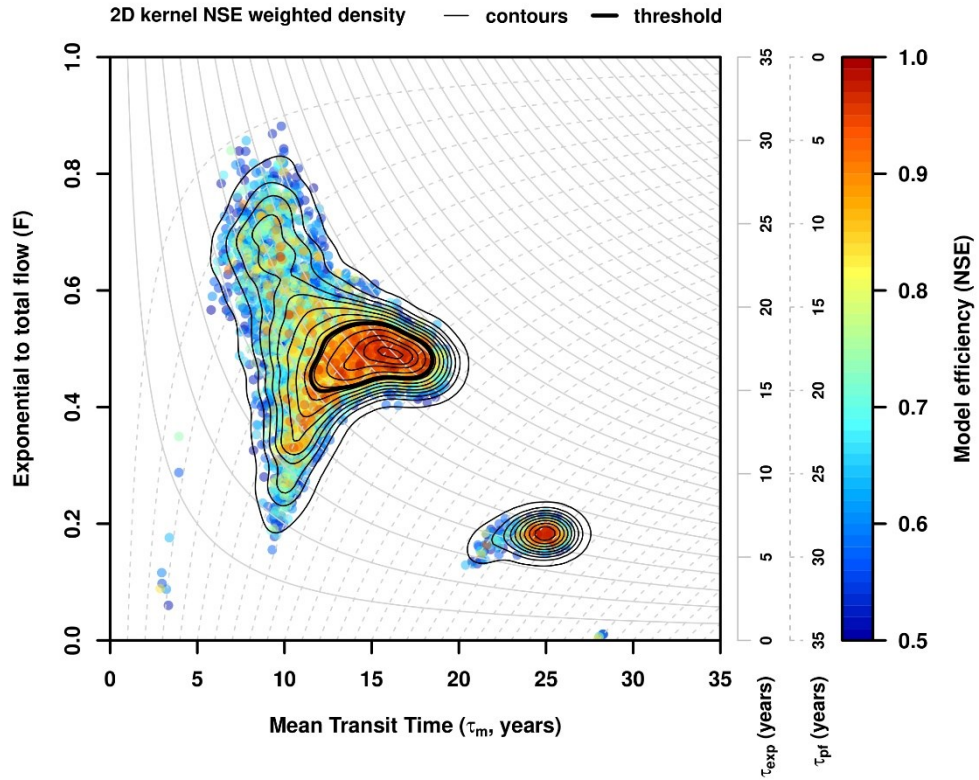

(b)

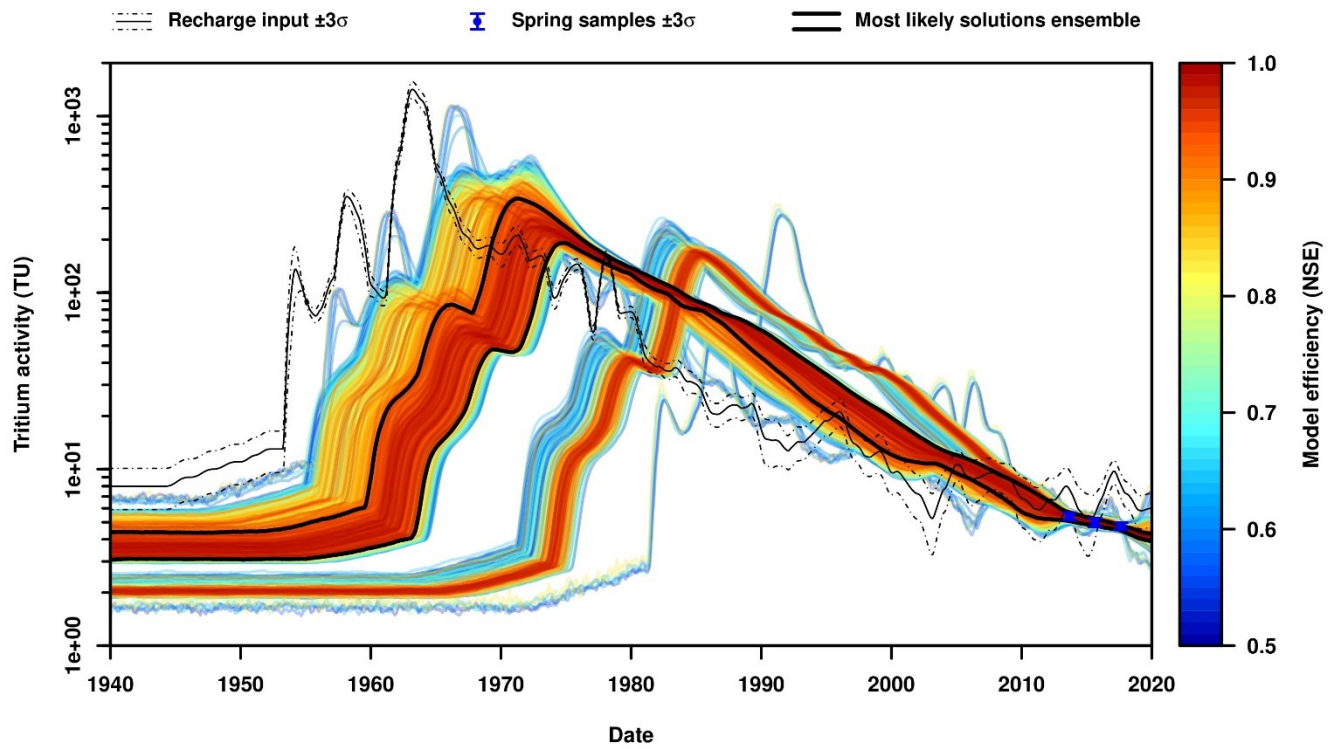

Figure S26: Modelling results of spring K24 in the EPM parameter space (a) and associated modelled tritium time-series (b).

(a)

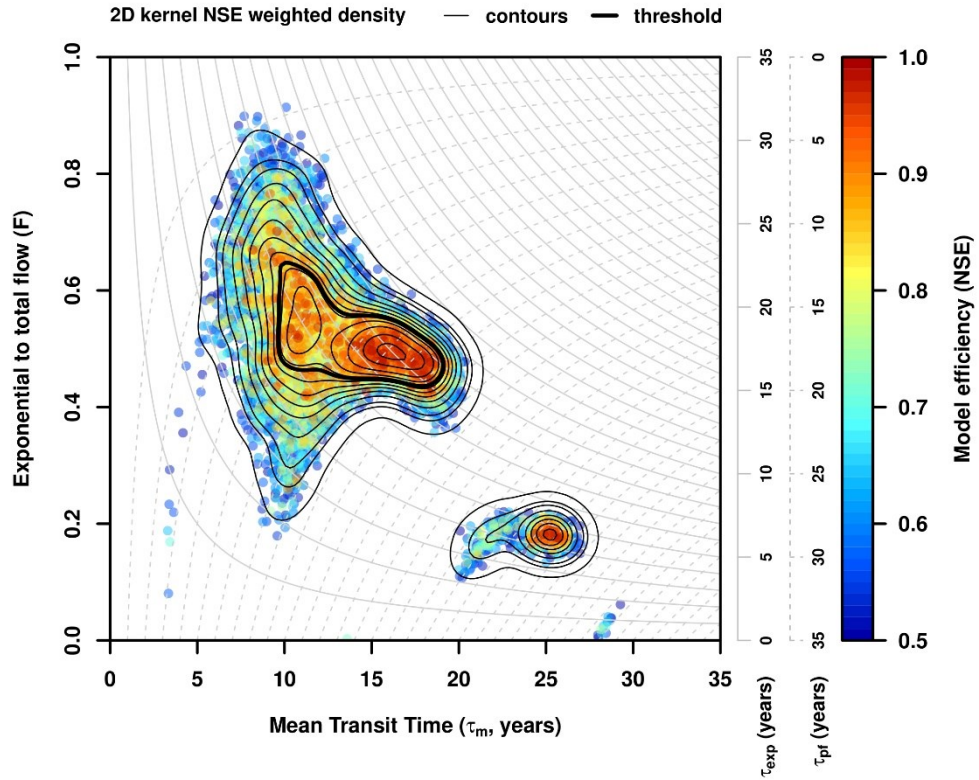

(b)

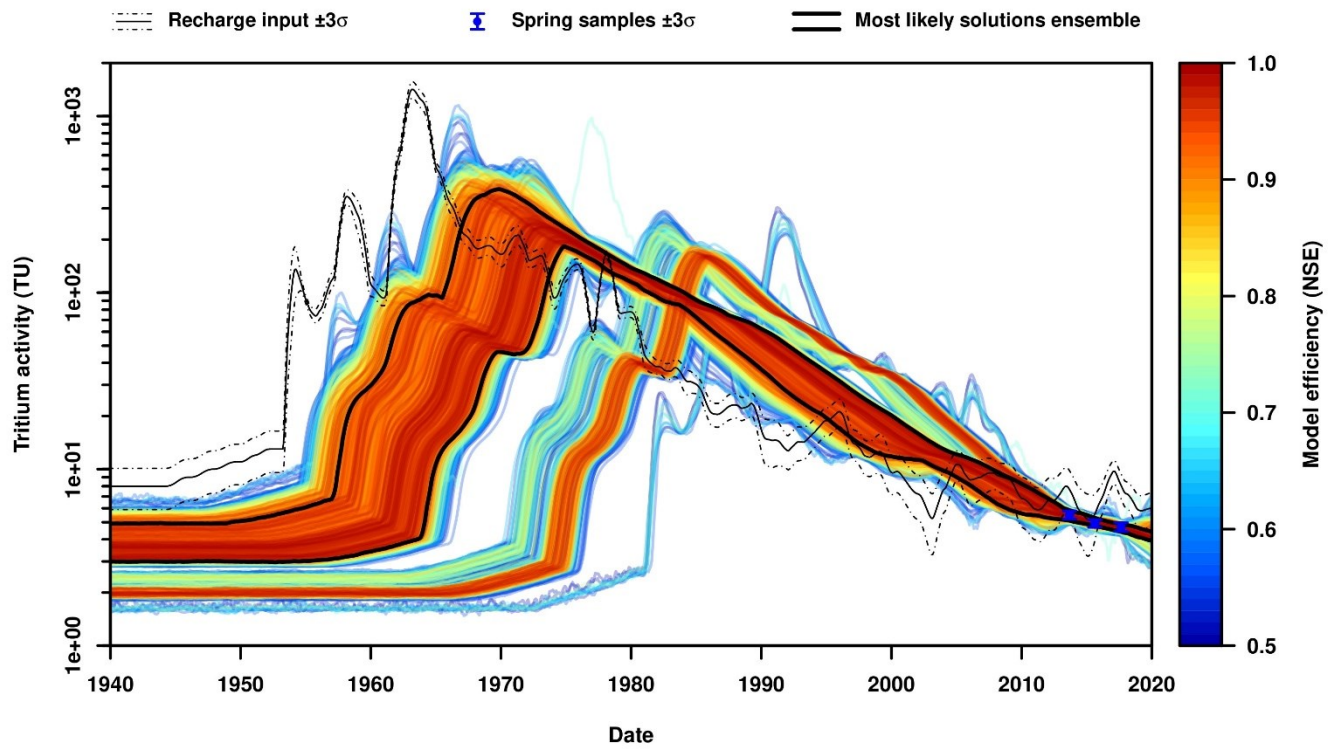

Figure S27: Modelling results of spring K26 in the EPM parameter space (a) and associated modelled tritium time-series (b).



(a)

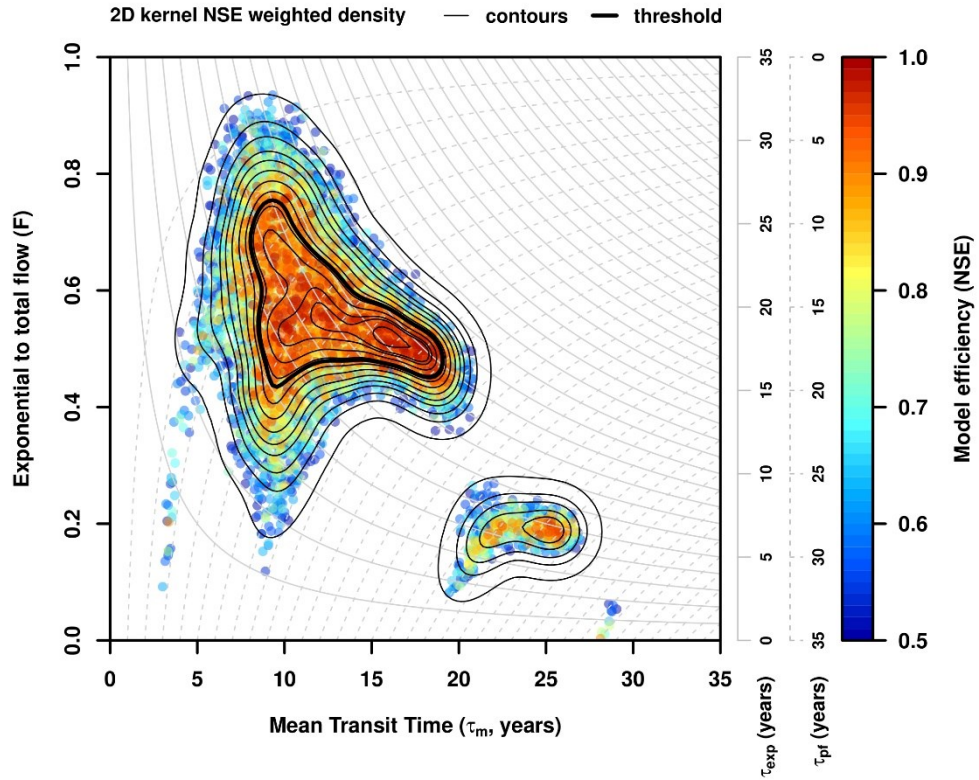

(b)

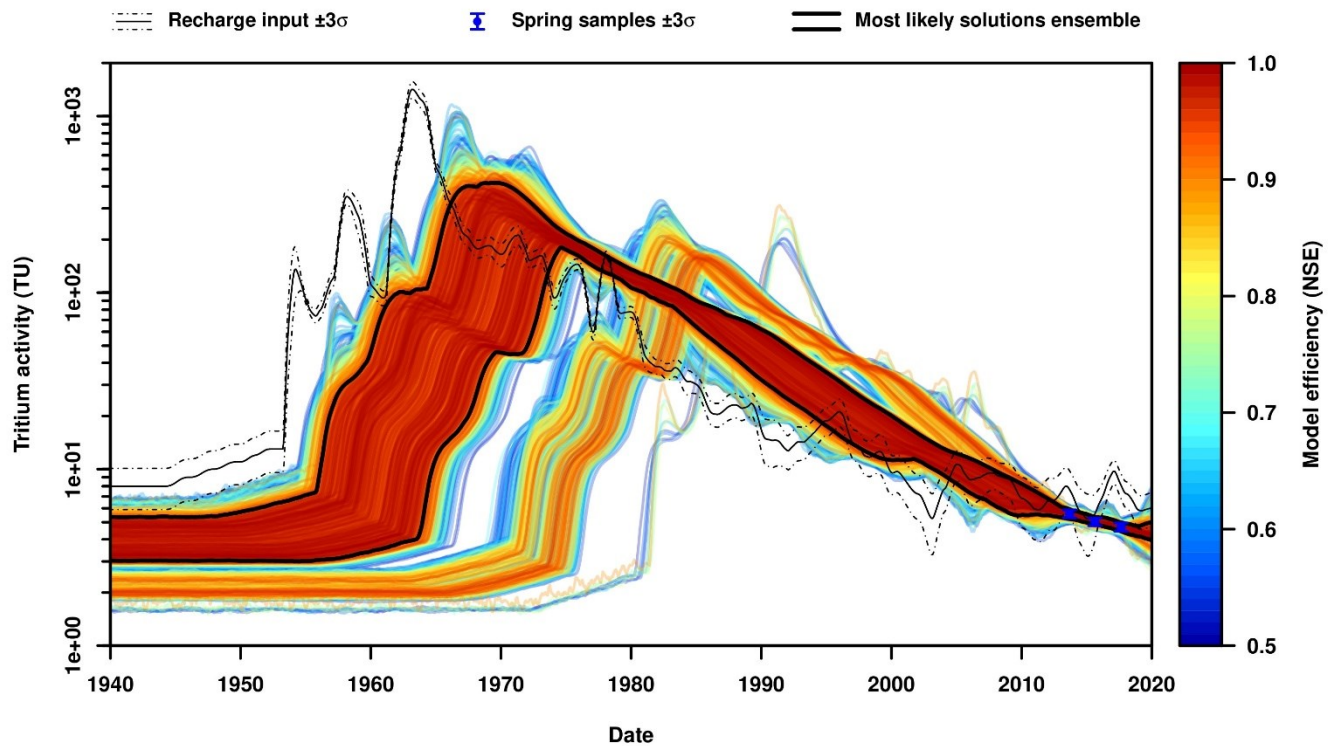

Figure S28: Modelling results of spring K28 in the EPM parameter space (a) and associated modelled tritium time-series (b).

(a)

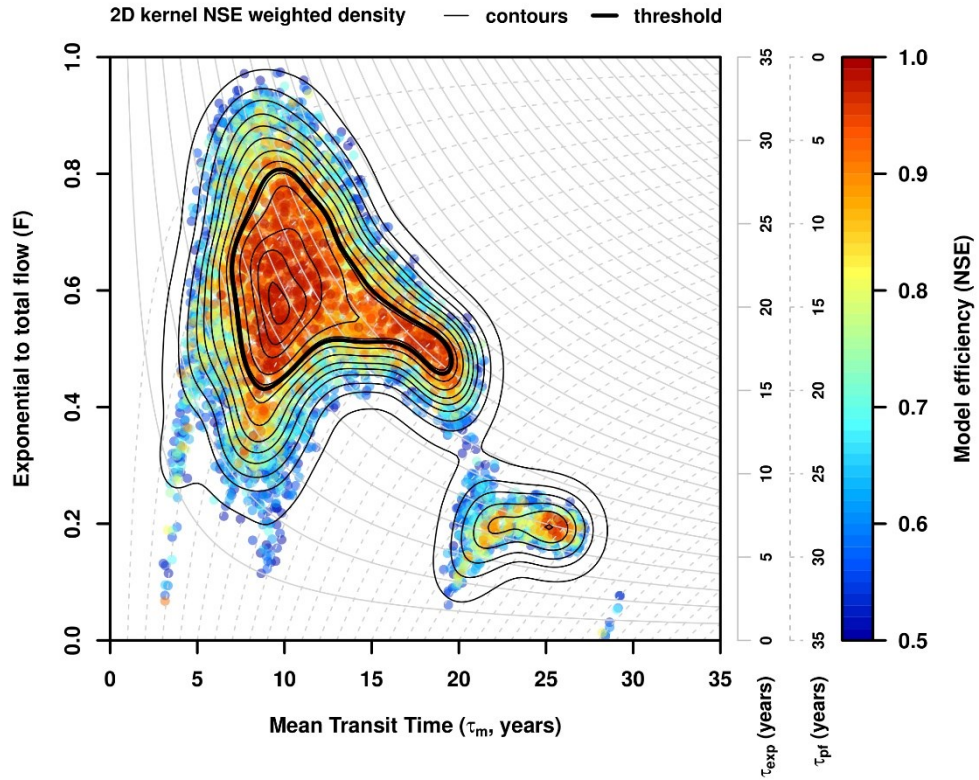

(b)

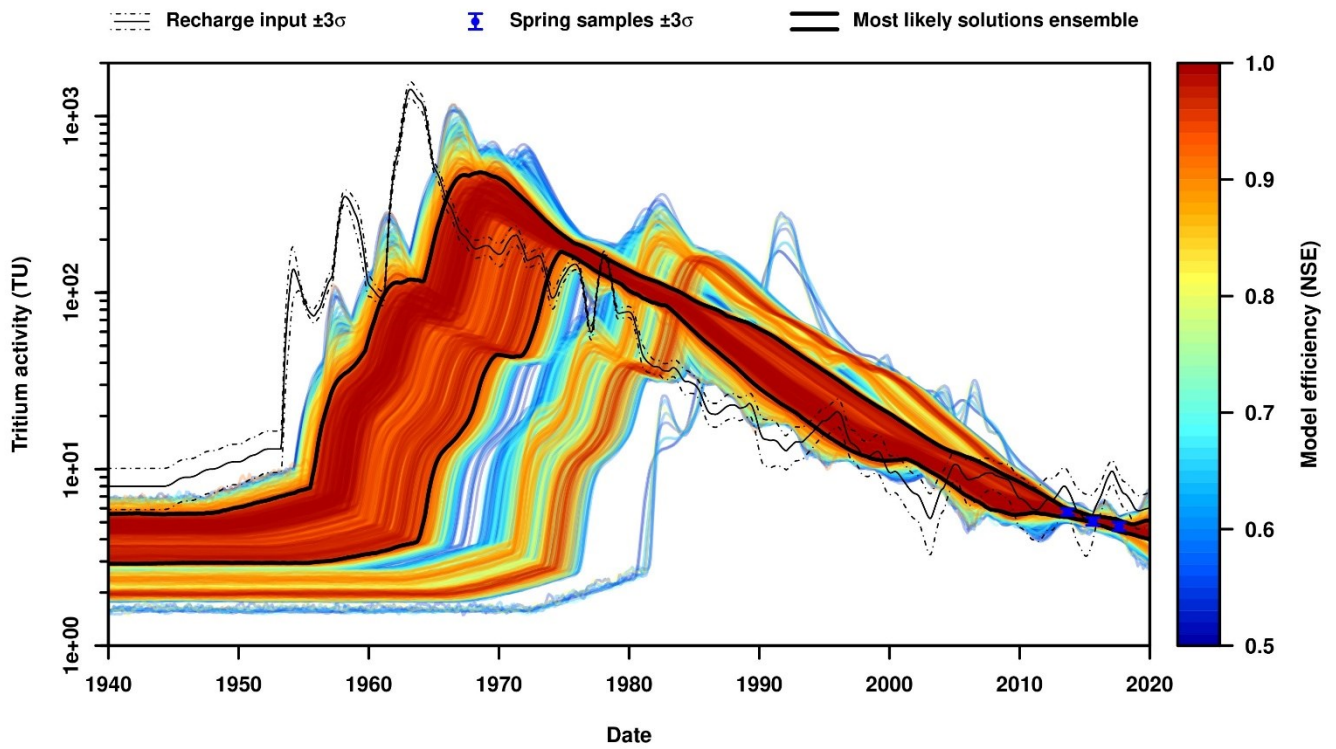

Figure S29: Modelling results of spring K31 in the EPM parameter space (a) and associated modelled tritium time-series (b).

(a)

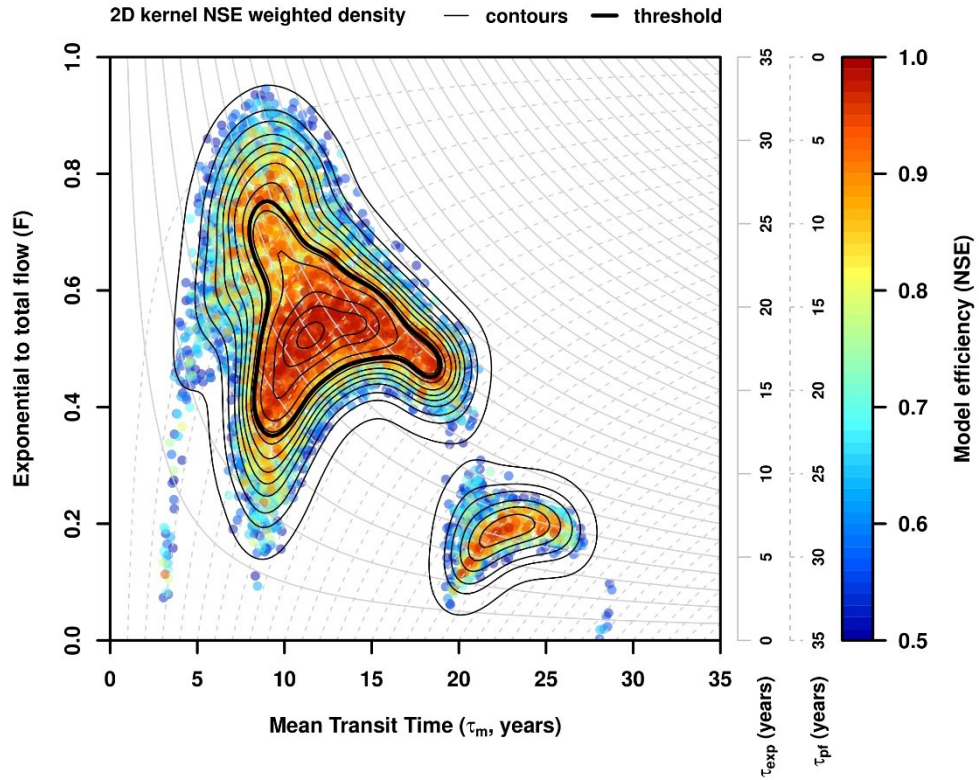

(b)

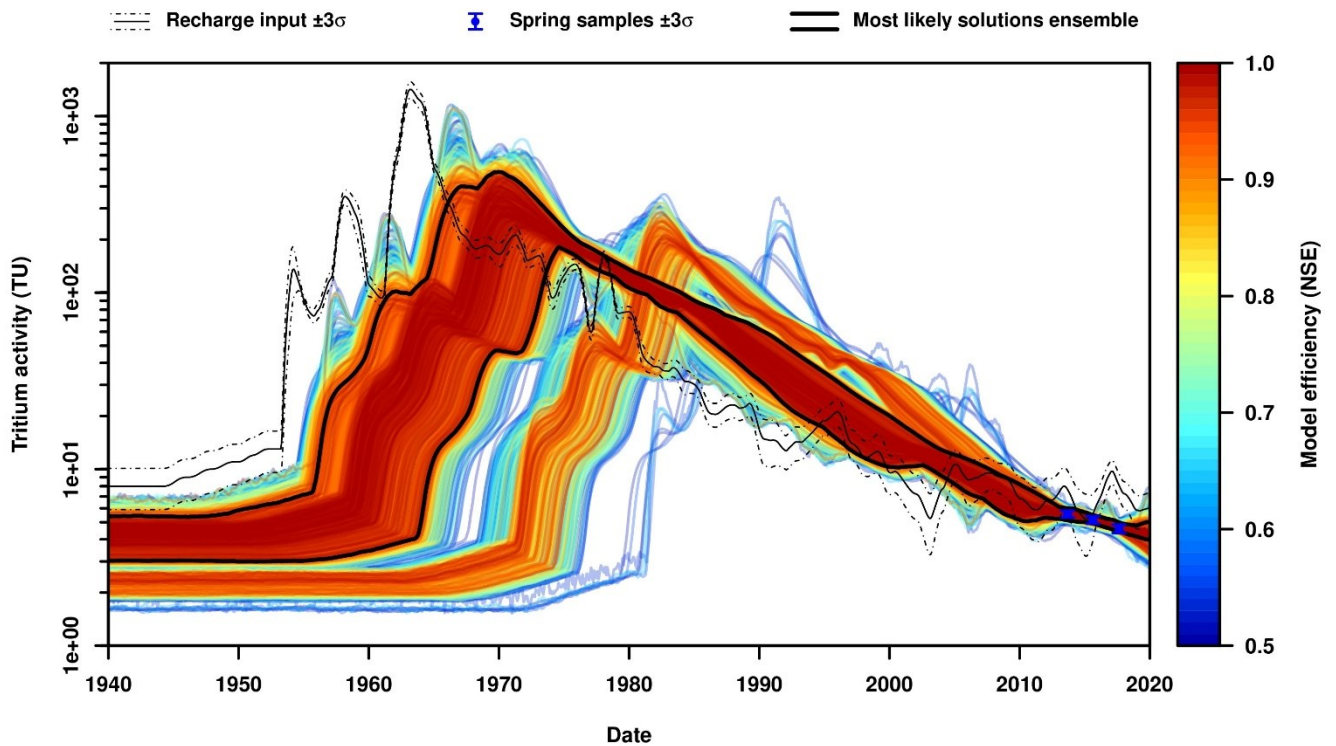

Figure S30: Modelling results of spring K32 in the EPM parameter space (a) and associated modelled tritium time-series (b).



(a)

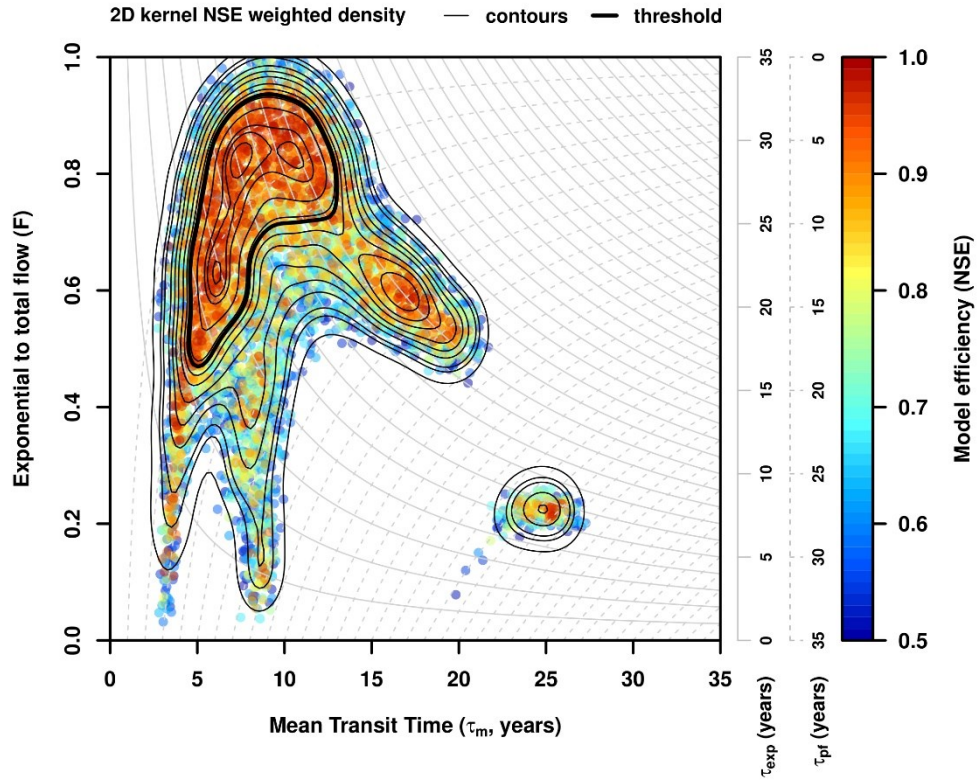

(b)

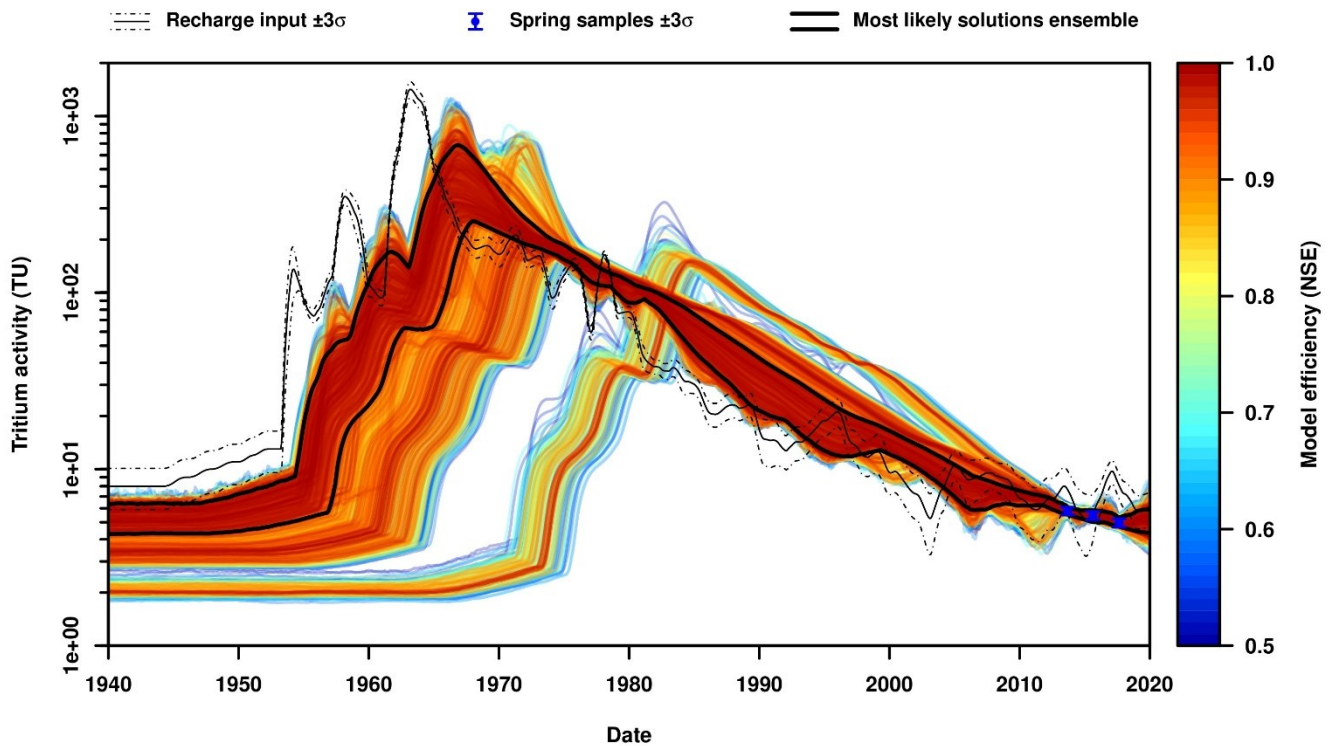

Figure S31: Modelling results of spring M01 in the EPM parameter space (a) and associated modelled tritium time-series (b).

(a)

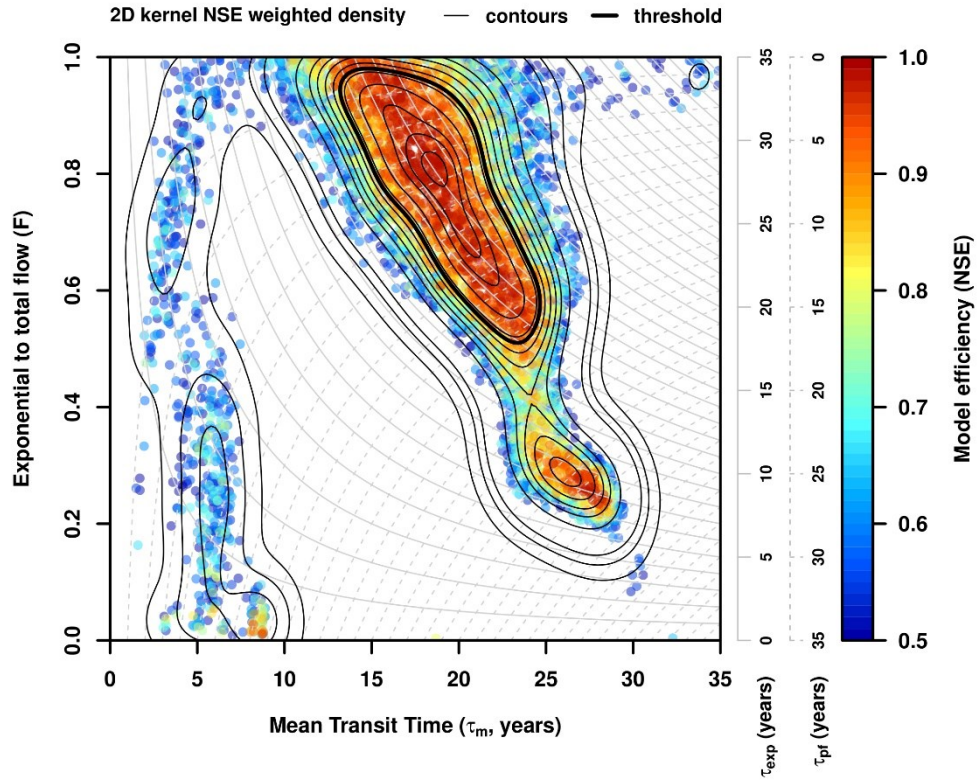

(b)

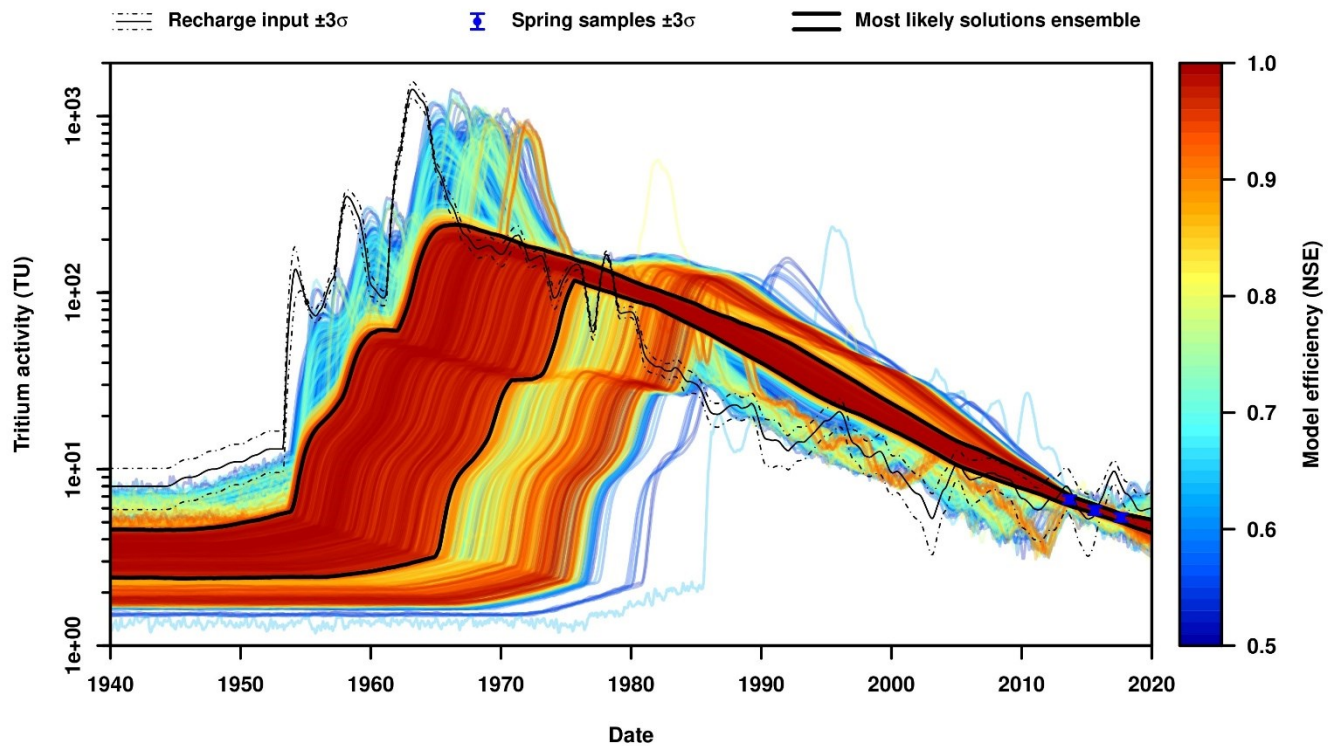

Figure S32: Modelling results of spring P01 in the EPM parameter space (a) and associated modelled tritium time-series (b).



(a)

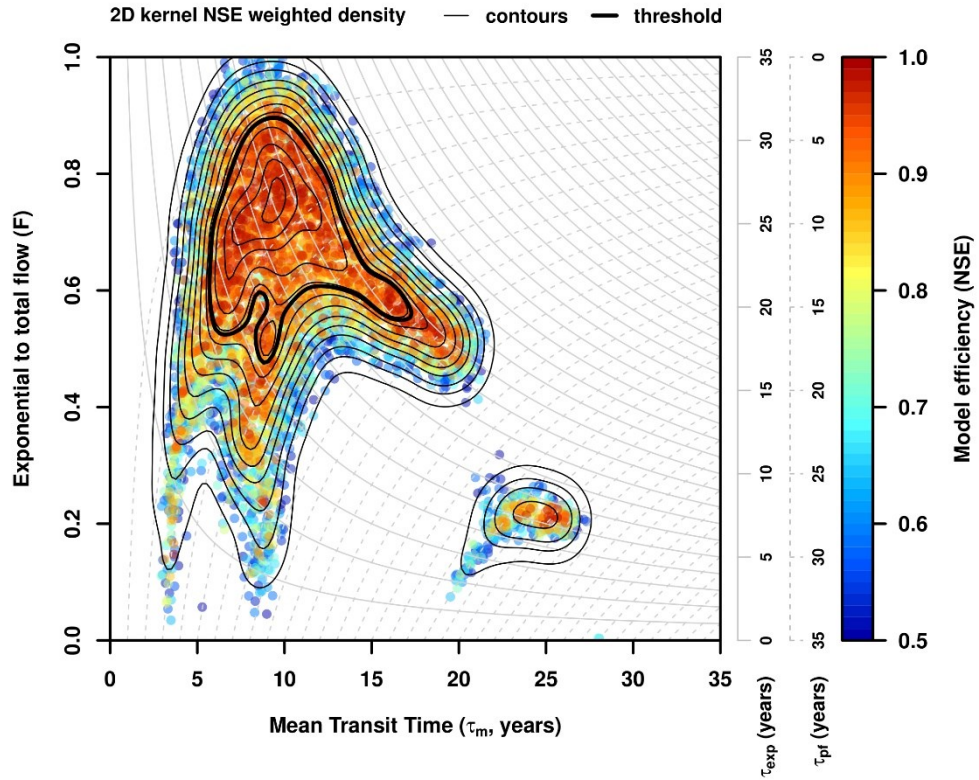

(b)

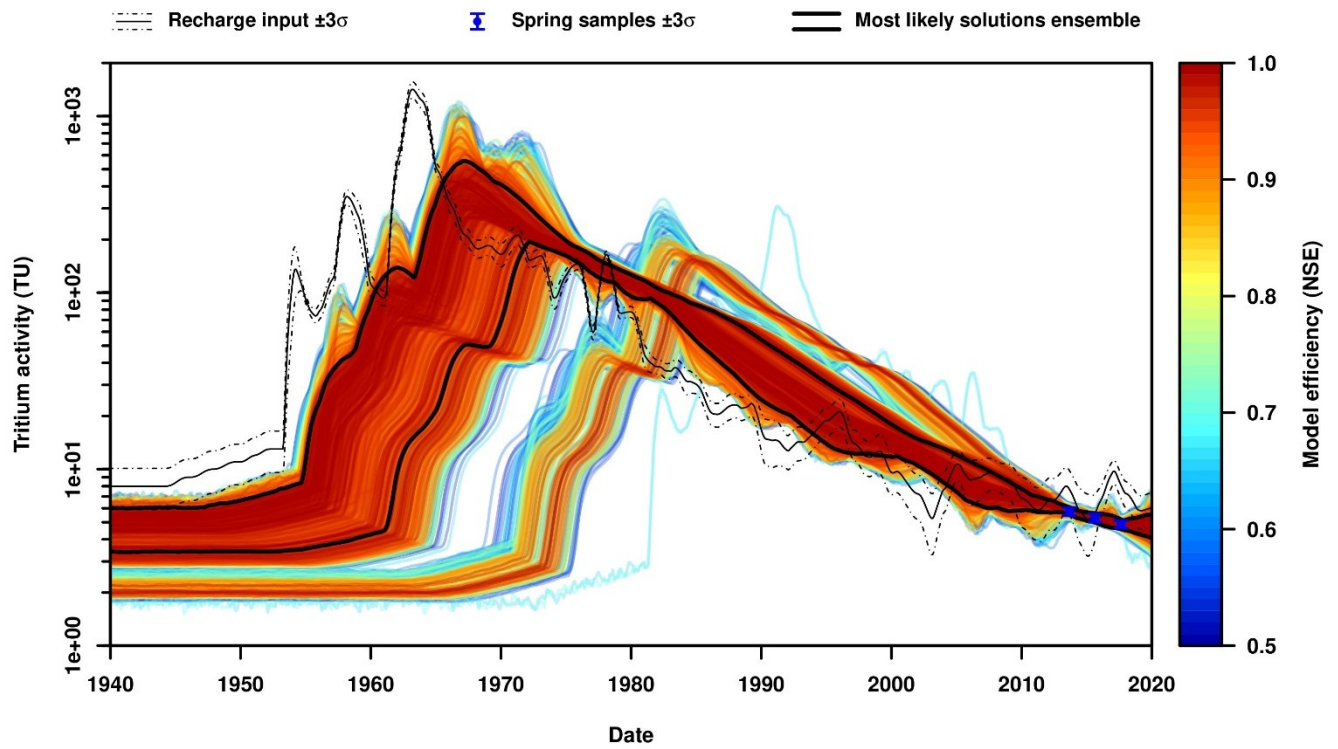

Figure S33: Modelling results of spring S01 in the EPM parameter space (a) and associated modelled tritium time-series (b).

(a)

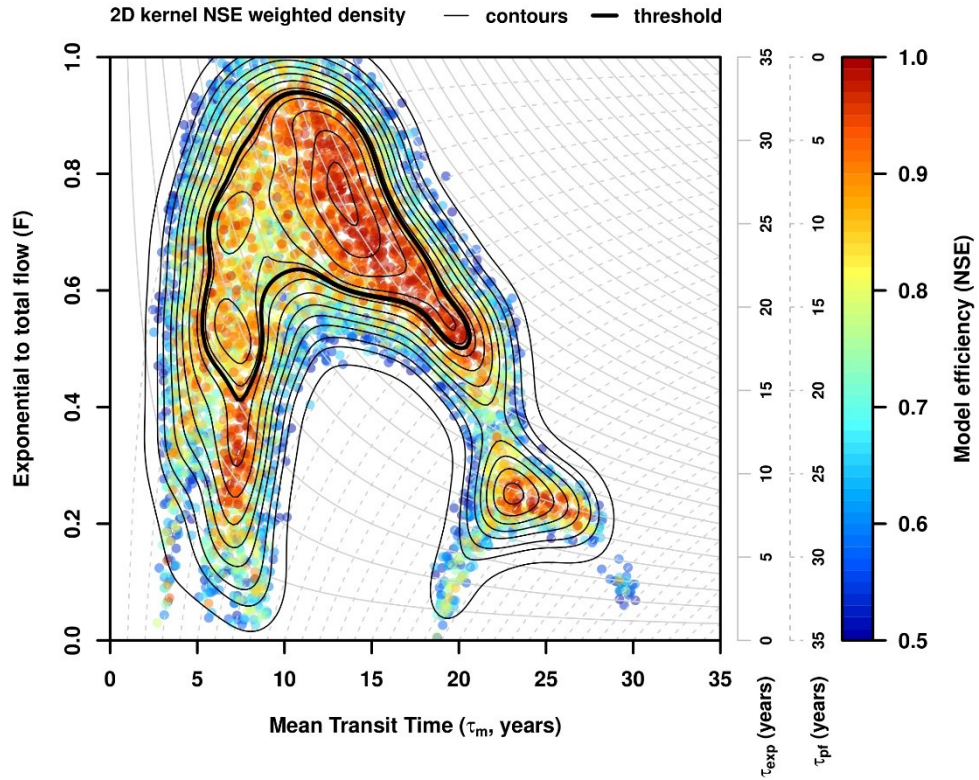

(b)

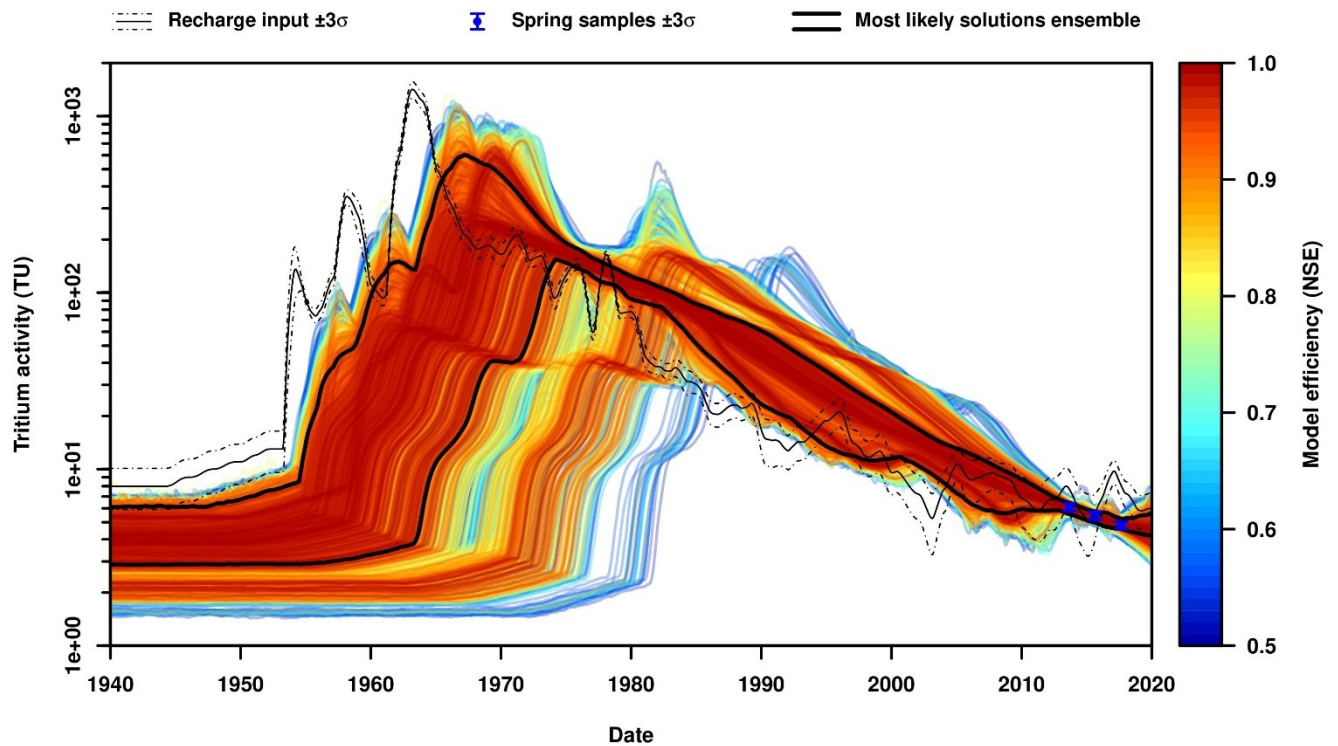

Figure S34: Modelling results of spring S02 in the EPM parameter space (a) and associated modelled tritium time-series (b).

(a)

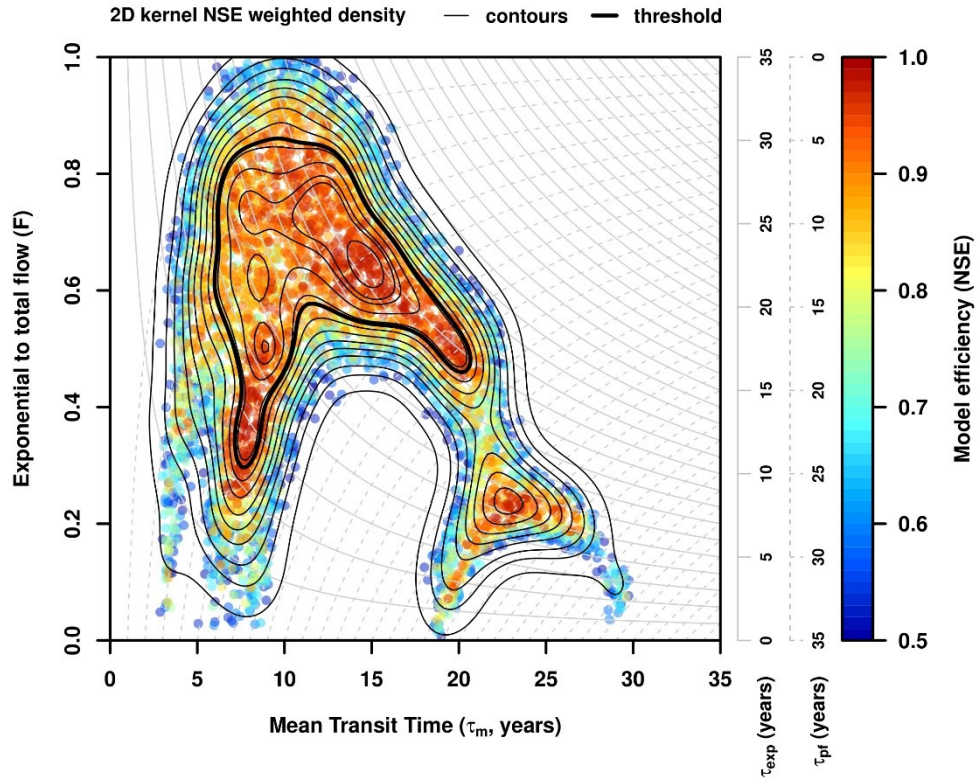

(b)

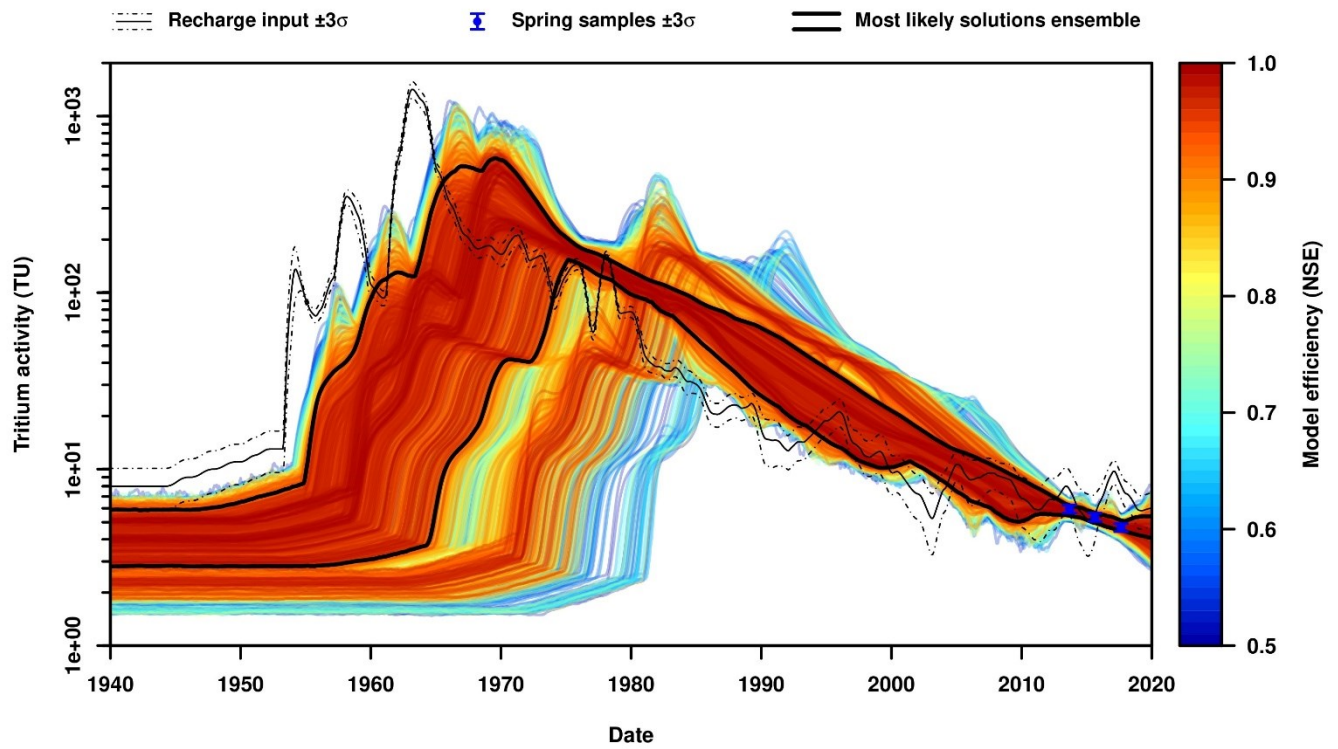

Figure S35: Modelling results of spring S03 in the EPM parameter space (a) and associated modelled tritium time-series (b).
